# Supplementary material
Source: publisher figshare collection journal article supplement (https://gsapubs.figshare.com/articles/dataset/_/12536186)
Supplement: Supplementary file 1 [file 1]

GSA Data Repository 2018078

Govin et al., 2018, Timing and mechanism of the rise of the Shillong Plateau in the Himalayan foreland: *Geology*, <https://doi.org/10.1130/G39864.1>.

Analytical and stress calculation methods and supplementary figures

Table DR1: sample locations

Table DR2: zircon U-Pb ages from source-areas compilation

Tables DR3 and DR4: zircon U-Pb ion probe data and standard

Tables DR5 and DR6: zircon U-Pb laser ablation data and standard

Table DR7: rutile U-Pb laser ablation data and standard

TABLE DR1a: LOCATIONS OF SAMPLES FROM DUNGSANG CHU SECTION (Coutand et al 2016)

| Sample no | Depositional age (Ma) | Strat height (m) up section | Latitude (°N) | Longitude (°E) |
|-----------|-----------------------|-----------------------------|---------------|----------------|
| SJ12      | 1.75±0.05             | 2136                        | 26.83164      | 91.48105       |
| SJ9       | 4.70±0.05             | 1610                        | 26.82300      | 91.48179       |
| SJ8       | 4.85±0.05             | 1394                        | 26.82036      | 91.48350       |
| SJ7       | 5.20±0.05             | 1205                        | 26.81966      | 91.48624       |
| SJ6b      | 5.45±0.10             | 1047                        | 26.81930      | 91.48952       |
| SJ4       | 6.35±0.05             | 620                         | 26.81198      | 91.49379       |
| SJ2       | 7.05±0.05             | 74                          | 26.80851      | 91.50233       |
| SJ1b      | >7.10±n/a             | -150                        | 26.80052      | 91.50239       |

TABLE DR1b: SOURCE AREA COMPILATION U-Pb ZIRCON

| Source area    | Age (Ma) | Error ± 1σ | Reference        |
|----------------|----------|------------|------------------|
| Southern Lhasa | 183      | 2          | Chu et al., 2006 |
| Southern Lhasa | 185      | 3          | Chu et al., 2006 |
| Southern Lhasa | 193      | 3          | Chu et al., 2006 |
| Southern Lhasa | 181      | 3          | Chu et al., 2006 |
| Southern Lhasa | 187      | 3          | Chu et al., 2006 |
| Southern Lhasa | 190      | 3          | Chu et al., 2006 |
| Southern Lhasa | 195      | 3          | Chu et al., 2006 |
| Southern Lhasa | 191      | 3          | Chu et al., 2006 |
| Southern Lhasa | 188      | 3          | Chu et al., 2006 |
| Southern Lhasa | 187      | 3          | Chu et al., 2006 |
| Southern Lhasa | 190      | 3          | Chu et al., 2006 |
| Southern Lhasa | 194      | 4          | Chu et al., 2006 |
| Southern Lhasa | 181      | 4          | Chu et al., 2006 |
| Southern Lhasa | 188      | 4          | Chu et al., 2006 |
| Southern Lhasa | 197      | 4          | Chu et al., 2006 |
| Southern Lhasa | 199      | 4          | Chu et al., 2006 |
| Southern Lhasa | 191      | 4          | Chu et al., 2006 |
| Southern Lhasa | 191      | 4          | Chu et al., 2006 |
| Southern Lhasa | 189      | 5          | Chu et al., 2006 |
| Southern Lhasa | 195      | 6          | Chu et al., 2006 |
| Southern Lhasa | 52       | 1          | Ji et al., 2009  |
| Southern Lhasa | 49       | 1          | Ji et al., 2009  |
| Southern Lhasa | 45       | 1          | Ji et al., 2009  |
| Southern Lhasa | 46       | 1          | Ji et al., 2009  |
| Southern Lhasa | 51       | 1          | Ji et al., 2009  |
| Southern Lhasa | 49       | 1          | Ji et al., 2009  |
| Southern Lhasa | 50       | 1          | Ji et al., 2009  |
| Southern Lhasa | 50       | 1          | Ji et al., 2009  |
| Southern Lhasa | 62       | 1          | Ji et al., 2009  |
| Southern Lhasa | 63       | 1          | Ji et al., 2009  |
| Southern Lhasa | 64       | 1          | Ji et al., 2009  |
| Southern Lhasa | 62       | 1          | Ji et al., 2009  |
| Southern Lhasa | 62       | 1          | Ji et al., 2009  |
| Southern Lhasa | 64       | 1          | Ji et al., 2009  |
| Southern Lhasa | 64       | 1          | Ji et al., 2009  |
| Southern Lhasa | 65       | 1          | Ji et al., 2009  |
| Southern Lhasa | 54       | 1          | Ji et al., 2009  |
| Southern Lhasa | 53       | 1          | Ji et al., 2009  |
| Southern Lhasa | 58       | 1          | Ji et al., 2009  |
| Southern Lhasa | 55       | 1          | Ji et al., 2009  |
| Southern Lhasa | 53       | 1          | Ji et al., 2009  |
| Southern Lhasa | 52       | 1          | Ji et al., 2009  |
| Southern Lhasa | 58       | 1          | Ji et al., 2009  |
| Southern Lhasa | 58       | 1          | Ji et al., 2009  |
| Southern Lhasa | 56       | 1          | Ji et al., 2009  |
| Southern Lhasa | 57       | 1          | Ji et al., 2009  |
| Southern Lhasa | 55       | 1          | Ji et al., 2009  |
| Southern Lhasa | 56       | 1          | Ji et al., 2009  |
| Southern Lhasa | 56       | 1          | Ji et al., 2009  |
| Southern Lhasa | 57       | 1          | Ji et al., 2009  |
| Southern Lhasa | 58       | 1          | Ji et al., 2009  |

[illegible]

[illegible]

[illegible]

[illegible]

[illegible]

[illegible]



[illegible]

[illegible]

[illegible]

|                |     |   |                  |
|----------------|-----|---|------------------|
| Southern Lhasa | 201 | 4 | Ji et al., 2009  |
| Southern Lhasa | 212 | 4 | Ji et al., 2009  |
| Southern Lhasa | 211 | 4 | Ji et al., 2009  |
| Southern Lhasa | 208 | 4 | Ji et al., 2009  |
| Southern Lhasa | 196 | 4 | Ji et al., 2009  |
| Southern Lhasa | 204 | 4 | Ji et al., 2009  |
| Southern Lhasa | 209 | 4 | Ji et al., 2009  |
| Southern Lhasa | 209 | 4 | Ji et al., 2009  |
| Southern Lhasa | 198 | 4 | Ji et al., 2009  |
| Southern Lhasa | 159 | 4 | Ji et al., 2009  |
| Southern Lhasa | 156 | 4 | Ji et al., 2009  |
| Southern Lhasa | 163 | 4 | Ji et al., 2009  |
| Southern Lhasa | 154 | 4 | Ji et al., 2009  |
| Southern Lhasa | 180 | 4 | Ji et al., 2009  |
| Southern Lhasa | 184 | 4 | Ji et al., 2009  |
| Southern Lhasa | 182 | 4 | Ji et al., 2009  |
| Southern Lhasa | 111 | 4 | Ji et al., 2009  |
| Southern Lhasa | 110 | 4 | Ji et al., 2009  |
| Southern Lhasa | 109 | 4 | Ji et al., 2009  |
| Southern Lhasa | 57  | 5 | Ji et al., 2009  |
| Southern Lhasa | 53  | 5 | Ji et al., 2009  |
| Southern Lhasa | 54  | 5 | Ji et al., 2009  |
| Southern Lhasa | 188 | 5 | Ji et al., 2009  |
| Southern Lhasa | 183 | 5 | Ji et al., 2009  |
| Southern Lhasa | 190 | 5 | Ji et al., 2009  |
| Southern Lhasa | 190 | 5 | Ji et al., 2009  |
| Southern Lhasa | 199 | 5 | Ji et al., 2009  |
| Southern Lhasa | 190 | 5 | Ji et al., 2009  |
| Southern Lhasa | 204 | 5 | Ji et al., 2009  |
| Southern Lhasa | 203 | 5 | Ji et al., 2009  |
| Southern Lhasa | 211 | 5 | Ji et al., 2009  |
| Southern Lhasa | 215 | 5 | Ji et al., 2009  |
| Southern Lhasa | 176 | 5 | Ji et al., 2009  |
| Southern Lhasa | 174 | 5 | Ji et al., 2009  |
| Southern Lhasa | 174 | 5 | Ji et al., 2009  |
| Southern Lhasa | 176 | 5 | Ji et al., 2009  |
| Southern Lhasa | 174 | 5 | Ji et al., 2009  |
| Southern Lhasa | 174 | 5 | Ji et al., 2009  |
| Southern Lhasa | 178 | 5 | Ji et al., 2009  |
| Southern Lhasa | 174 | 5 | Ji et al., 2009  |
| Southern Lhasa | 174 | 5 | Ji et al., 2009  |
| Southern Lhasa | 173 | 5 | Ji et al., 2009  |
| Southern Lhasa | 173 | 5 | Ji et al., 2009  |
| Southern Lhasa | 194 | 5 | Ji et al., 2009  |
| Southern Lhasa | 176 | 5 | Ji et al., 2009  |
| Southern Lhasa | 176 | 5 | Ji et al., 2009  |
| Southern Lhasa | 172 | 5 | Ji et al., 2009  |
| Southern Lhasa | 114 | 5 | Ji et al., 2009  |
| Southern Lhasa | 103 | 5 | Ji et al., 2009  |
| Southern Lhasa | 110 | 5 | Ji et al., 2009  |
| Southern Lhasa | 63  | 1 | Lee et al., 2007 |
| Southern Lhasa | 64  | 1 | Lee et al., 2007 |
| Southern Lhasa | 64  | 1 | Lee et al., 2007 |
| Southern Lhasa | 57  | 1 | Lee et al., 2007 |
| Southern Lhasa | 60  | 1 | Lee et al., 2007 |
| Southern Lhasa | 56  | 1 | Lee et al., 2007 |
| Southern Lhasa | 55  | 1 | Lee et al., 2007 |
| Southern Lhasa | 59  | 1 | Lee et al., 2007 |
| Southern Lhasa | 55  | 1 | Lee et al., 2007 |
| Southern Lhasa | 60  | 2 | Lee et al., 2007 |
| Southern Lhasa | 59  | 2 | Lee et al., 2007 |
| Southern Lhasa | 58  | 2 | Lee et al., 2007 |
| Southern Lhasa | 65  | 2 | Lee et al., 2007 |
| Southern Lhasa | 64  | 2 | Lee et al., 2007 |
| Southern Lhasa | 59  | 2 | Lee et al., 2007 |
| Southern Lhasa | 55  | 2 | Lee et al., 2007 |
| Southern Lhasa | 61  | 2 | Lee et al., 2007 |
| Southern Lhasa | 59  | 2 | Lee et al., 2007 |
| Southern Lhasa | 54  | 2 | Lee et al., 2007 |
| Southern Lhasa | 55  | 1 | Lee et al., 2008 |
| Southern Lhasa | 56  | 1 | Lee et al., 2009 |

[illegible]

[illegible]

[illegible]

|                 |     |    |                      |
|-----------------|-----|----|----------------------|
| Southern Lhasa  | 85  | 3  | Zhu et al., 2011     |
| Southern Lhasa  | 83  | 3  | Zhu et al., 2011     |
| Southern Lhasa  | 201 | 3  | Zhu et al., 2011     |
| Southern Lhasa  | 192 | 3  | Zhu et al., 2011     |
| Southern Lhasa  | 191 | 3  | Zhu et al., 2011     |
| Southern Lhasa  | 191 | 3  | Zhu et al., 2011     |
| Southern Lhasa  | 192 | 3  | Zhu et al., 2011     |
| Southern Lhasa  | 202 | 3  | Zhu et al., 2011     |
| Southern Lhasa  | 204 | 3  | Zhu et al., 2011     |
| Southern Lhasa  | 208 | 3  | Zhu et al., 2011     |
| Southern Lhasa  | 202 | 3  | Zhu et al., 2011     |
| Southern Lhasa  | 206 | 3  | Zhu et al., 2011     |
| Southern Lhasa  | 200 | 3  | Zhu et al., 2011     |
| Southern Lhasa  | 201 | 3  | Zhu et al., 2011     |
| Southern Lhasa  | 199 | 3  | Zhu et al., 2011     |
| Southern Lhasa  | 84  | 3  | Zhu et al., 2011     |
| Southern Lhasa  | 82  | 4  | Zhu et al., 2011     |
| Southern Lhasa  | 190 | 4  | Zhu et al., 2011     |
| Southern Lhasa  | 192 | 4  | Zhu et al., 2011     |
| Southern Lhasa  | 190 | 4  | Zhu et al., 2011     |
| Southern Lhasa  | 190 | 4  | Zhu et al., 2011     |
| Southern Lhasa  | 206 | 4  | Zhu et al., 2011     |
| Southern Lhasa  | 200 | 4  | Zhu et al., 2011     |
| Southern Lhasa  | 200 | 4  | Zhu et al., 2011     |
| Southern Lhasa  | 206 | 5  | Zhu et al., 2011     |
| Southern Lhasa  | 203 | 5  | Zhu et al., 2011     |
| Lesser Himalaya | 474 | 33 | Gehrels et al., 2008 |
| Lesser Himalaya | 525 | 8  | Gehrels et al., 2008 |
| Lesser Himalaya | 537 | 14 | Gehrels et al., 2008 |
| Lesser Himalaya | 542 | 9  | Gehrels et al., 2008 |
| Lesser Himalaya | 542 | 15 | Gehrels et al., 2008 |
| Lesser Himalaya | 550 | 8  | Gehrels et al., 2008 |
| Lesser Himalaya | 552 | 6  | Gehrels et al., 2008 |
| Lesser Himalaya | 553 | 3  | Gehrels et al., 2008 |
| Lesser Himalaya | 555 | 3  | Gehrels et al., 2008 |
| Lesser Himalaya | 560 | 19 | Gehrels et al., 2008 |
| Lesser Himalaya | 561 | 13 | Gehrels et al., 2008 |
| Lesser Himalaya | 563 | 13 | Gehrels et al., 2008 |
| Lesser Himalaya | 578 | 15 | Gehrels et al., 2008 |
| Lesser Himalaya | 585 | 6  | Gehrels et al., 2008 |
| Lesser Himalaya | 590 | 14 | Gehrels et al., 2008 |
| Lesser Himalaya | 594 | 9  | Gehrels et al., 2008 |
| Lesser Himalaya | 599 | 21 | Gehrels et al., 2008 |
| Lesser Himalaya | 620 | 6  | Gehrels et al., 2008 |
| Lesser Himalaya | 644 | 14 | Gehrels et al., 2008 |
| Lesser Himalaya | 650 | 30 | Gehrels et al., 2008 |
| Lesser Himalaya | 655 | 21 | Gehrels et al., 2008 |
| Lesser Himalaya | 662 | 12 | Gehrels et al., 2008 |
| Lesser Himalaya | 663 | 4  | Gehrels et al., 2008 |
| Lesser Himalaya | 674 | 6  | Gehrels et al., 2008 |
| Lesser Himalaya | 684 | 15 | Gehrels et al., 2008 |
| Lesser Himalaya | 686 | 8  | Gehrels et al., 2008 |
| Lesser Himalaya | 691 | 4  | Gehrels et al., 2008 |
| Lesser Himalaya | 749 | 9  | Gehrels et al., 2008 |
| Lesser Himalaya | 752 | 10 | Gehrels et al., 2008 |
| Lesser Himalaya | 754 | 5  | Gehrels et al., 2008 |
| Lesser Himalaya | 766 | 9  | Gehrels et al., 2008 |
| Lesser Himalaya | 773 | 77 | Gehrels et al., 2008 |
| Lesser Himalaya | 785 | 16 | Gehrels et al., 2008 |
| Lesser Himalaya | 789 | 14 | Gehrels et al., 2008 |
| Lesser Himalaya | 792 | 13 | Gehrels et al., 2008 |
| Lesser Himalaya | 797 | 14 | Gehrels et al., 2008 |
| Lesser Himalaya | 800 | 7  | Gehrels et al., 2008 |
| Lesser Himalaya | 810 | 12 | Gehrels et al., 2008 |
| Lesser Himalaya | 812 | 14 | Gehrels et al., 2008 |
| Lesser Himalaya | 822 | 17 | Gehrels et al., 2008 |
| Lesser Himalaya | 825 | 19 | Gehrels et al., 2008 |
| Lesser Himalaya | 830 | 6  | Gehrels et al., 2008 |
| Lesser Himalaya | 838 | 15 | Gehrels et al., 2008 |
| Lesser Himalaya | 841 | 17 | Gehrels et al., 2008 |
| Lesser Himalaya | 841 | 13 | Gehrels et al., 2008 |



|                 |      |    |                      |
|-----------------|------|----|----------------------|
| Lesser Himalaya | 843  | 16 | Gehrels et al., 2008 |
| Lesser Himalaya | 843  | 7  | Gehrels et al., 2008 |
| Lesser Himalaya | 864  | 16 | Gehrels et al., 2008 |
| Lesser Himalaya | 869  | 14 | Gehrels et al., 2008 |
| Lesser Himalaya | 873  | 42 | Gehrels et al., 2008 |
| Lesser Himalaya | 906  | 9  | Gehrels et al., 2008 |
| Lesser Himalaya | 910  | 11 | Gehrels et al., 2008 |
| Lesser Himalaya | 929  | 6  | Gehrels et al., 2008 |
| Lesser Himalaya | 929  | 9  | Gehrels et al., 2008 |
| Lesser Himalaya | 932  | 12 | Gehrels et al., 2008 |
| Lesser Himalaya | 936  | 7  | Gehrels et al., 2008 |
| Lesser Himalaya | 941  | 20 | Gehrels et al., 2008 |
| Lesser Himalaya | 953  | 15 | Gehrels et al., 2008 |
| Lesser Himalaya | 953  | 23 | Gehrels et al., 2008 |
| Lesser Himalaya | 959  | 19 | Gehrels et al., 2008 |
| Lesser Himalaya | 962  | 8  | Gehrels et al., 2008 |
| Lesser Himalaya | 967  | 33 | Gehrels et al., 2008 |
| Lesser Himalaya | 969  | 16 | Gehrels et al., 2008 |
| Lesser Himalaya | 969  | 19 | Gehrels et al., 2008 |
| Lesser Himalaya | 974  | 12 | Gehrels et al., 2008 |
| Lesser Himalaya | 977  | 18 | Gehrels et al., 2008 |
| Lesser Himalaya | 979  | 10 | Gehrels et al., 2008 |
| Lesser Himalaya | 979  | 10 | Gehrels et al., 2008 |
| Lesser Himalaya | 979  | 12 | Gehrels et al., 2008 |
| Lesser Himalaya | 984  | 10 | Gehrels et al., 2008 |
| Lesser Himalaya | 986  | 14 | Gehrels et al., 2008 |
| Lesser Himalaya | 993  | 17 | Gehrels et al., 2008 |
| Lesser Himalaya | 993  | 16 | Gehrels et al., 2008 |
| Lesser Himalaya | 994  | 16 | Gehrels et al., 2008 |
| Lesser Himalaya | 999  | 22 | Gehrels et al., 2008 |
| Lesser Himalaya | 1008 | 7  | Gehrels et al., 2008 |
| Lesser Himalaya | 1010 | 21 | Gehrels et al., 2008 |
| Lesser Himalaya | 1014 | 11 | Gehrels et al., 2008 |
| Lesser Himalaya | 1016 | 10 | Gehrels et al., 2008 |
| Lesser Himalaya | 1016 | 12 | Gehrels et al., 2008 |
| Lesser Himalaya | 1025 | 9  | Gehrels et al., 2008 |
| Lesser Himalaya | 1044 | 25 | Gehrels et al., 2008 |
| Lesser Himalaya | 1052 | 9  | Gehrels et al., 2008 |
| Lesser Himalaya | 1065 | 11 | Gehrels et al., 2008 |
| Lesser Himalaya | 1079 | 25 | Gehrels et al., 2008 |
| Lesser Himalaya | 1081 | 14 | Gehrels et al., 2008 |
| Lesser Himalaya | 1082 | 18 | Gehrels et al., 2008 |
| Lesser Himalaya | 1101 | 32 | Gehrels et al., 2008 |
| Lesser Himalaya | 1111 | 12 | Gehrels et al., 2008 |
| Lesser Himalaya | 1136 | 16 | Gehrels et al., 2008 |
| Lesser Himalaya | 1139 | 9  | Gehrels et al., 2008 |
| Lesser Himalaya | 1147 | 13 | Gehrels et al., 2008 |
| Lesser Himalaya | 1153 | 6  | Gehrels et al., 2008 |
| Lesser Himalaya | 1164 | 53 | Gehrels et al., 2008 |
| Lesser Himalaya | 1303 | 24 | Gehrels et al., 2008 |
| Lesser Himalaya | 1372 | 42 | Gehrels et al., 2008 |
| Lesser Himalaya | 1458 | 19 | Gehrels et al., 2008 |
| Lesser Himalaya | 1470 | 12 | Gehrels et al., 2008 |
| Lesser Himalaya | 1528 | 82 | Gehrels et al., 2008 |
| Lesser Himalaya | 1560 | 7  | Gehrels et al., 2008 |
| Lesser Himalaya | 1599 | 15 | Gehrels et al., 2008 |
| Lesser Himalaya | 1604 | 22 | Gehrels et al., 2008 |
| Lesser Himalaya | 1611 | 36 | Gehrels et al., 2008 |
| Lesser Himalaya | 1614 | 50 | Gehrels et al., 2008 |
| Lesser Himalaya | 1615 | 25 | Gehrels et al., 2008 |
| Lesser Himalaya | 1622 | 6  | Gehrels et al., 2008 |
| Lesser Himalaya | 1625 | 14 | Gehrels et al., 2008 |
| Lesser Himalaya | 1629 | 58 | Gehrels et al., 2008 |
| Lesser Himalaya | 1638 | 12 | Gehrels et al., 2008 |
| Lesser Himalaya | 1640 | 20 | Gehrels et al., 2008 |
| Lesser Himalaya | 1644 | 26 | Gehrels et al., 2008 |
| Lesser Himalaya | 1661 | 46 | Gehrels et al., 2008 |
| Lesser Himalaya | 1661 | 23 | Gehrels et al., 2008 |
| Lesser Himalaya | 1673 | 16 | Gehrels et al., 2008 |
| Lesser Himalaya | 1673 | 25 | Gehrels et al., 2008 |
| Lesser Himalaya | 1682 | 60 | Gehrels et al., 2008 |

|                 |      |    |                      |
|-----------------|------|----|----------------------|
| Lesser Himalaya | 1684 | 38 | Gehrels et al., 2008 |
| Lesser Himalaya | 1686 | 7  | Gehrels et al., 2008 |
| Lesser Himalaya | 1687 | 3  | Gehrels et al., 2008 |
| Lesser Himalaya | 1698 | 17 | Gehrels et al., 2008 |
| Lesser Himalaya | 1699 | 36 | Gehrels et al., 2008 |
| Lesser Himalaya | 1715 | 18 | Gehrels et al., 2008 |
| Lesser Himalaya | 1716 | 5  | Gehrels et al., 2008 |
| Lesser Himalaya | 1717 | 4  | Gehrels et al., 2008 |
| Lesser Himalaya | 1717 | 14 | Gehrels et al., 2008 |
| Lesser Himalaya | 1718 | 48 | Gehrels et al., 2008 |
| Lesser Himalaya | 1721 | 10 | Gehrels et al., 2008 |
| Lesser Himalaya | 1725 | 27 | Gehrels et al., 2008 |
| Lesser Himalaya | 1726 | 28 | Gehrels et al., 2008 |
| Lesser Himalaya | 1728 | 4  | Gehrels et al., 2008 |
| Lesser Himalaya | 1732 | 16 | Gehrels et al., 2008 |
| Lesser Himalaya | 1733 | 2  | Gehrels et al., 2008 |
| Lesser Himalaya | 1733 | 7  | Gehrels et al., 2008 |
| Lesser Himalaya | 1737 | 6  | Gehrels et al., 2008 |
| Lesser Himalaya | 1744 | 11 | Gehrels et al., 2008 |
| Lesser Himalaya | 1745 | 5  | Gehrels et al., 2008 |
| Lesser Himalaya | 1750 | 95 | Gehrels et al., 2008 |
| Lesser Himalaya | 1750 | 6  | Gehrels et al., 2008 |
| Lesser Himalaya | 1752 | 9  | Gehrels et al., 2008 |
| Lesser Himalaya | 1757 | 14 | Gehrels et al., 2008 |
| Lesser Himalaya | 1759 | 10 | Gehrels et al., 2008 |
| Lesser Himalaya | 1763 | 7  | Gehrels et al., 2008 |
| Lesser Himalaya | 1769 | 3  | Gehrels et al., 2008 |
| Lesser Himalaya | 1770 | 6  | Gehrels et al., 2008 |
| Lesser Himalaya | 1771 | 5  | Gehrels et al., 2008 |
| Lesser Himalaya | 1777 | 26 | Gehrels et al., 2008 |
| Lesser Himalaya | 1777 | 4  | Gehrels et al., 2008 |
| Lesser Himalaya | 1779 | 6  | Gehrels et al., 2008 |
| Lesser Himalaya | 1780 | 4  | Gehrels et al., 2008 |
| Lesser Himalaya | 1780 | 4  | Gehrels et al., 2008 |
| Lesser Himalaya | 1782 | 8  | Gehrels et al., 2008 |
| Lesser Himalaya | 1784 | 6  | Gehrels et al., 2008 |
| Lesser Himalaya | 1785 | 8  | Gehrels et al., 2008 |
| Lesser Himalaya | 1788 | 6  | Gehrels et al., 2008 |
| Lesser Himalaya | 1789 | 7  | Gehrels et al., 2008 |
| Lesser Himalaya | 1790 | 5  | Gehrels et al., 2008 |
| Lesser Himalaya | 1791 | 6  | Gehrels et al., 2008 |
| Lesser Himalaya | 1792 | 14 | Gehrels et al., 2008 |
| Lesser Himalaya | 1794 | 16 | Gehrels et al., 2008 |
| Lesser Himalaya | 1797 | 15 | Gehrels et al., 2008 |
| Lesser Himalaya | 1797 | 9  | Gehrels et al., 2008 |
| Lesser Himalaya | 1798 | 3  | Gehrels et al., 2008 |
| Lesser Himalaya | 1798 | 56 | Gehrels et al., 2008 |
| Lesser Himalaya | 1799 | 5  | Gehrels et al., 2008 |
| Lesser Himalaya | 1804 | 7  | Gehrels et al., 2008 |
| Lesser Himalaya | 1804 | 10 | Gehrels et al., 2008 |
| Lesser Himalaya | 1807 | 6  | Gehrels et al., 2008 |
| Lesser Himalaya | 1810 | 5  | Gehrels et al., 2008 |
| Lesser Himalaya | 1811 | 10 | Gehrels et al., 2008 |
| Lesser Himalaya | 1817 | 9  | Gehrels et al., 2008 |
| Lesser Himalaya | 1817 | 6  | Gehrels et al., 2008 |
| Lesser Himalaya | 1818 | 4  | Gehrels et al., 2008 |
| Lesser Himalaya | 1818 | 6  | Gehrels et al., 2008 |
| Lesser Himalaya | 1820 | 4  | Gehrels et al., 2008 |
| Lesser Himalaya | 1822 | 3  | Gehrels et al., 2008 |
| Lesser Himalaya | 1824 | 24 | Gehrels et al., 2008 |
| Lesser Himalaya | 1824 | 5  | Gehrels et al., 2008 |
| Lesser Himalaya | 1826 | 5  | Gehrels et al., 2008 |
| Lesser Himalaya | 1827 | 5  | Gehrels et al., 2008 |
| Lesser Himalaya | 1827 | 13 | Gehrels et al., 2008 |
| Lesser Himalaya | 1828 | 5  | Gehrels et al., 2008 |
| Lesser Himalaya | 1830 | 9  | Gehrels et al., 2008 |
| Lesser Himalaya | 1830 | 4  | Gehrels et al., 2008 |
| Lesser Himalaya | 1832 | 7  | Gehrels et al., 2008 |
| Lesser Himalaya | 1834 | 30 | Gehrels et al., 2008 |
| Lesser Himalaya | 1834 | 12 | Gehrels et al., 2008 |
| Lesser Himalaya | 1835 | 6  | Gehrels et al., 2008 |

[illegible]

[illegible]

[illegible]

[illegible]

|                 |      |    |                      |
|-----------------|------|----|----------------------|
| Lesser Himalaya | 1977 | 6  | Gehrels et al., 2008 |
| Lesser Himalaya | 1977 | 6  | Gehrels et al., 2008 |
| Lesser Himalaya | 1980 | 11 | Gehrels et al., 2008 |
| Lesser Himalaya | 1980 | 5  | Gehrels et al., 2008 |
| Lesser Himalaya | 1980 | 5  | Gehrels et al., 2008 |
| Lesser Himalaya | 1981 | 3  | Gehrels et al., 2008 |
| Lesser Himalaya | 1982 | 4  | Gehrels et al., 2008 |
| Lesser Himalaya | 1986 | 3  | Gehrels et al., 2008 |
| Lesser Himalaya | 1986 | 10 | Gehrels et al., 2008 |
| Lesser Himalaya | 1986 | 4  | Gehrels et al., 2008 |
| Lesser Himalaya | 1987 | 11 | Gehrels et al., 2008 |
| Lesser Himalaya | 1988 | 30 | Gehrels et al., 2008 |
| Lesser Himalaya | 1989 | 4  | Gehrels et al., 2008 |
| Lesser Himalaya | 1992 | 6  | Gehrels et al., 2008 |
| Lesser Himalaya | 1994 | 2  | Gehrels et al., 2008 |
| Lesser Himalaya | 1995 | 6  | Gehrels et al., 2008 |
| Lesser Himalaya | 1997 | 9  | Gehrels et al., 2008 |
| Lesser Himalaya | 2001 | 9  | Gehrels et al., 2008 |
| Lesser Himalaya | 2001 | 1  | Gehrels et al., 2008 |
| Lesser Himalaya | 2004 | 8  | Gehrels et al., 2008 |
| Lesser Himalaya | 2004 | 9  | Gehrels et al., 2008 |
| Lesser Himalaya | 2005 | 5  | Gehrels et al., 2008 |
| Lesser Himalaya | 2006 | 4  | Gehrels et al., 2008 |
| Lesser Himalaya | 2006 | 5  | Gehrels et al., 2008 |
| Lesser Himalaya | 2006 | 8  | Gehrels et al., 2008 |
| Lesser Himalaya | 2006 | 6  | Gehrels et al., 2008 |
| Lesser Himalaya | 2009 | 3  | Gehrels et al., 2008 |
| Lesser Himalaya | 2010 | 3  | Gehrels et al., 2008 |
| Lesser Himalaya | 2011 | 7  | Gehrels et al., 2008 |
| Lesser Himalaya | 2012 | 6  | Gehrels et al., 2008 |
| Lesser Himalaya | 2016 | 3  | Gehrels et al., 2008 |
| Lesser Himalaya | 2017 | 9  | Gehrels et al., 2008 |
| Lesser Himalaya | 2018 | 7  | Gehrels et al., 2008 |
| Lesser Himalaya | 2018 | 6  | Gehrels et al., 2008 |
| Lesser Himalaya | 2019 | 9  | Gehrels et al., 2008 |
| Lesser Himalaya | 2019 | 4  | Gehrels et al., 2008 |
| Lesser Himalaya | 2021 | 7  | Gehrels et al., 2008 |
| Lesser Himalaya | 2022 | 25 | Gehrels et al., 2008 |
| Lesser Himalaya | 2022 | 4  | Gehrels et al., 2008 |
| Lesser Himalaya | 2025 | 7  | Gehrels et al., 2008 |
| Lesser Himalaya | 2026 | 4  | Gehrels et al., 2008 |
| Lesser Himalaya | 2026 | 8  | Gehrels et al., 2008 |
| Lesser Himalaya | 2028 | 6  | Gehrels et al., 2008 |
| Lesser Himalaya | 2034 | 2  | Gehrels et al., 2008 |
| Lesser Himalaya | 2035 | 3  | Gehrels et al., 2008 |
| Lesser Himalaya | 2035 | 8  | Gehrels et al., 2008 |
| Lesser Himalaya | 2036 | 3  | Gehrels et al., 2008 |
| Lesser Himalaya | 2037 | 10 | Gehrels et al., 2008 |
| Lesser Himalaya | 2039 | 2  | Gehrels et al., 2008 |
| Lesser Himalaya | 2040 | 11 | Gehrels et al., 2008 |
| Lesser Himalaya | 2042 | 2  | Gehrels et al., 2008 |
| Lesser Himalaya | 2046 | 18 | Gehrels et al., 2008 |
| Lesser Himalaya | 2046 | 4  | Gehrels et al., 2008 |
| Lesser Himalaya | 2046 | 4  | Gehrels et al., 2008 |
| Lesser Himalaya | 2050 | 3  | Gehrels et al., 2008 |
| Lesser Himalaya | 2051 | 14 | Gehrels et al., 2008 |
| Lesser Himalaya | 2056 | 18 | Gehrels et al., 2008 |
| Lesser Himalaya | 2062 | 2  | Gehrels et al., 2008 |
| Lesser Himalaya | 2065 | 4  | Gehrels et al., 2008 |
| Lesser Himalaya | 2074 | 9  | Gehrels et al., 2008 |
| Lesser Himalaya | 2075 | 5  | Gehrels et al., 2008 |
| Lesser Himalaya | 2080 | 7  | Gehrels et al., 2008 |
| Lesser Himalaya | 2084 | 7  | Gehrels et al., 2008 |
| Lesser Himalaya | 2085 | 9  | Gehrels et al., 2008 |
| Lesser Himalaya | 2085 | 11 | Gehrels et al., 2008 |
| Lesser Himalaya | 2087 | 3  | Gehrels et al., 2008 |
| Lesser Himalaya | 2088 | 5  | Gehrels et al., 2008 |
| Lesser Himalaya | 2100 | 10 | Gehrels et al., 2008 |
| Lesser Himalaya | 2100 | 5  | Gehrels et al., 2008 |
| Lesser Himalaya | 2101 | 2  | Gehrels et al., 2008 |
| Lesser Himalaya | 2102 | 6  | Gehrels et al., 2008 |

|                 |      |    |                      |
|-----------------|------|----|----------------------|
| Lesser Himalaya | 2103 | 3  | Gehrels et al., 2008 |
| Lesser Himalaya | 2106 | 24 | Gehrels et al., 2008 |
| Lesser Himalaya | 2108 | 2  | Gehrels et al., 2008 |
| Lesser Himalaya | 2116 | 3  | Gehrels et al., 2008 |
| Lesser Himalaya | 2127 | 5  | Gehrels et al., 2008 |
| Lesser Himalaya | 2137 | 2  | Gehrels et al., 2008 |
| Lesser Himalaya | 2137 | 2  | Gehrels et al., 2008 |
| Lesser Himalaya | 2138 | 2  | Gehrels et al., 2008 |
| Lesser Himalaya | 2142 | 3  | Gehrels et al., 2008 |
| Lesser Himalaya | 2149 | 7  | Gehrels et al., 2008 |
| Lesser Himalaya | 2149 | 8  | Gehrels et al., 2008 |
| Lesser Himalaya | 2151 | 4  | Gehrels et al., 2008 |
| Lesser Himalaya | 2151 | 6  | Gehrels et al., 2008 |
| Lesser Himalaya | 2154 | 14 | Gehrels et al., 2008 |
| Lesser Himalaya | 2154 | 3  | Gehrels et al., 2008 |
| Lesser Himalaya | 2156 | 36 | Gehrels et al., 2008 |
| Lesser Himalaya | 2157 | 1  | Gehrels et al., 2008 |
| Lesser Himalaya | 2159 | 4  | Gehrels et al., 2008 |
| Lesser Himalaya | 2160 | 14 | Gehrels et al., 2008 |
| Lesser Himalaya | 2167 | 4  | Gehrels et al., 2008 |
| Lesser Himalaya | 2176 | 14 | Gehrels et al., 2008 |
| Lesser Himalaya | 2180 | 3  | Gehrels et al., 2008 |
| Lesser Himalaya | 2186 | 32 | Gehrels et al., 2008 |
| Lesser Himalaya | 2189 | 9  | Gehrels et al., 2008 |
| Lesser Himalaya | 2193 | 6  | Gehrels et al., 2008 |
| Lesser Himalaya | 2199 | 12 | Gehrels et al., 2008 |
| Lesser Himalaya | 2201 | 17 | Gehrels et al., 2008 |
| Lesser Himalaya | 2208 | 19 | Gehrels et al., 2008 |
| Lesser Himalaya | 2215 | 4  | Gehrels et al., 2008 |
| Lesser Himalaya | 2217 | 4  | Gehrels et al., 2008 |
| Lesser Himalaya | 2217 | 5  | Gehrels et al., 2008 |
| Lesser Himalaya | 2218 | 1  | Gehrels et al., 2008 |
| Lesser Himalaya | 2222 | 5  | Gehrels et al., 2008 |
| Lesser Himalaya | 2224 | 3  | Gehrels et al., 2008 |
| Lesser Himalaya | 2226 | 1  | Gehrels et al., 2008 |
| Lesser Himalaya | 2228 | 6  | Gehrels et al., 2008 |
| Lesser Himalaya | 2231 | 19 | Gehrels et al., 2008 |
| Lesser Himalaya | 2231 | 3  | Gehrels et al., 2008 |
| Lesser Himalaya | 2233 | 6  | Gehrels et al., 2008 |
| Lesser Himalaya | 2234 | 4  | Gehrels et al., 2008 |
| Lesser Himalaya | 2235 | 3  | Gehrels et al., 2008 |
| Lesser Himalaya | 2236 | 3  | Gehrels et al., 2008 |
| Lesser Himalaya | 2238 | 14 | Gehrels et al., 2008 |
| Lesser Himalaya | 2238 | 2  | Gehrels et al., 2008 |
| Lesser Himalaya | 2242 | 7  | Gehrels et al., 2008 |
| Lesser Himalaya | 2243 | 5  | Gehrels et al., 2008 |
| Lesser Himalaya | 2251 | 3  | Gehrels et al., 2008 |
| Lesser Himalaya | 2251 | 3  | Gehrels et al., 2008 |
| Lesser Himalaya | 2263 | 19 | Gehrels et al., 2008 |
| Lesser Himalaya | 2264 | 2  | Gehrels et al., 2008 |
| Lesser Himalaya | 2270 | 3  | Gehrels et al., 2008 |
| Lesser Himalaya | 2275 | 4  | Gehrels et al., 2008 |
| Lesser Himalaya | 2277 | 6  | Gehrels et al., 2008 |
| Lesser Himalaya | 2280 | 4  | Gehrels et al., 2008 |
| Lesser Himalaya | 2282 | 39 | Gehrels et al., 2008 |
| Lesser Himalaya | 2287 | 8  | Gehrels et al., 2008 |
| Lesser Himalaya | 2288 | 3  | Gehrels et al., 2008 |
| Lesser Himalaya | 2297 | 2  | Gehrels et al., 2008 |
| Lesser Himalaya | 2298 | 2  | Gehrels et al., 2008 |
| Lesser Himalaya | 2305 | 2  | Gehrels et al., 2008 |
| Lesser Himalaya | 2312 | 1  | Gehrels et al., 2008 |
| Lesser Himalaya | 2314 | 10 | Gehrels et al., 2008 |
| Lesser Himalaya | 2314 | 2  | Gehrels et al., 2008 |
| Lesser Himalaya | 2316 | 9  | Gehrels et al., 2008 |
| Lesser Himalaya | 2328 | 4  | Gehrels et al., 2008 |
| Lesser Himalaya | 2333 | 6  | Gehrels et al., 2008 |
| Lesser Himalaya | 2345 | 12 | Gehrels et al., 2008 |
| Lesser Himalaya | 2349 | 7  | Gehrels et al., 2008 |
| Lesser Himalaya | 2355 | 10 | Gehrels et al., 2008 |
| Lesser Himalaya | 2357 | 2  | Gehrels et al., 2008 |
| Lesser Himalaya | 2358 | 32 | Gehrels et al., 2008 |



|                 |      |    |                      |
|-----------------|------|----|----------------------|
| Lesser Himalaya | 2362 | 6  | Gehrels et al., 2008 |
| Lesser Himalaya | 2363 | 4  | Gehrels et al., 2008 |
| Lesser Himalaya | 2366 | 3  | Gehrels et al., 2008 |
| Lesser Himalaya | 2368 | 3  | Gehrels et al., 2008 |
| Lesser Himalaya | 2368 | 3  | Gehrels et al., 2008 |
| Lesser Himalaya | 2373 | 14 | Gehrels et al., 2008 |
| Lesser Himalaya | 2375 | 3  | Gehrels et al., 2008 |
| Lesser Himalaya | 2381 | 4  | Gehrels et al., 2008 |
| Lesser Himalaya | 2392 | 4  | Gehrels et al., 2008 |
| Lesser Himalaya | 2395 | 2  | Gehrels et al., 2008 |
| Lesser Himalaya | 2397 | 3  | Gehrels et al., 2008 |
| Lesser Himalaya | 2398 | 14 | Gehrels et al., 2008 |
| Lesser Himalaya | 2400 | 2  | Gehrels et al., 2008 |
| Lesser Himalaya | 2400 | 5  | Gehrels et al., 2008 |
| Lesser Himalaya | 2403 | 3  | Gehrels et al., 2008 |
| Lesser Himalaya | 2406 | 20 | Gehrels et al., 2008 |
| Lesser Himalaya | 2406 | 2  | Gehrels et al., 2008 |
| Lesser Himalaya | 2418 | 5  | Gehrels et al., 2008 |
| Lesser Himalaya | 2420 | 12 | Gehrels et al., 2008 |
| Lesser Himalaya | 2423 | 2  | Gehrels et al., 2008 |
| Lesser Himalaya | 2427 | 2  | Gehrels et al., 2008 |
| Lesser Himalaya | 2429 | 12 | Gehrels et al., 2008 |
| Lesser Himalaya | 2432 | 5  | Gehrels et al., 2008 |
| Lesser Himalaya | 2432 | 10 | Gehrels et al., 2008 |
| Lesser Himalaya | 2434 | 14 | Gehrels et al., 2008 |
| Lesser Himalaya | 2435 | 9  | Gehrels et al., 2008 |
| Lesser Himalaya | 2435 | 5  | Gehrels et al., 2008 |
| Lesser Himalaya | 2436 | 4  | Gehrels et al., 2008 |
| Lesser Himalaya | 2451 | 17 | Gehrels et al., 2008 |
| Lesser Himalaya | 2451 | 33 | Gehrels et al., 2008 |
| Lesser Himalaya | 2453 | 15 | Gehrels et al., 2008 |
| Lesser Himalaya | 2454 | 12 | Gehrels et al., 2008 |
| Lesser Himalaya | 2454 | 4  | Gehrels et al., 2008 |
| Lesser Himalaya | 2455 | 5  | Gehrels et al., 2008 |
| Lesser Himalaya | 2456 | 38 | Gehrels et al., 2008 |
| Lesser Himalaya | 2461 | 3  | Gehrels et al., 2008 |
| Lesser Himalaya | 2465 | 22 | Gehrels et al., 2008 |
| Lesser Himalaya | 2467 | 5  | Gehrels et al., 2008 |
| Lesser Himalaya | 2468 | 6  | Gehrels et al., 2008 |
| Lesser Himalaya | 2469 | 10 | Gehrels et al., 2008 |
| Lesser Himalaya | 2472 | 5  | Gehrels et al., 2008 |
| Lesser Himalaya | 2476 | 10 | Gehrels et al., 2008 |
| Lesser Himalaya | 2480 | 17 | Gehrels et al., 2008 |
| Lesser Himalaya | 2480 | 14 | Gehrels et al., 2008 |
| Lesser Himalaya | 2480 | 1  | Gehrels et al., 2008 |
| Lesser Himalaya | 2486 | 3  | Gehrels et al., 2008 |
| Lesser Himalaya | 2493 | 3  | Gehrels et al., 2008 |
| Lesser Himalaya | 2494 | 5  | Gehrels et al., 2008 |
| Lesser Himalaya | 2494 | 6  | Gehrels et al., 2008 |
| Lesser Himalaya | 2495 | 7  | Gehrels et al., 2008 |
| Lesser Himalaya | 2495 | 2  | Gehrels et al., 2008 |
| Lesser Himalaya | 2498 | 7  | Gehrels et al., 2008 |
| Lesser Himalaya | 2499 | 2  | Gehrels et al., 2008 |
| Lesser Himalaya | 2500 | 3  | Gehrels et al., 2008 |
| Lesser Himalaya | 2501 | 22 | Gehrels et al., 2008 |
| Lesser Himalaya | 2502 | 12 | Gehrels et al., 2008 |
| Lesser Himalaya | 2504 | 6  | Gehrels et al., 2008 |
| Lesser Himalaya | 2510 | 12 | Gehrels et al., 2008 |
| Lesser Himalaya | 2516 | 2  | Gehrels et al., 2008 |
| Lesser Himalaya | 2516 | 3  | Gehrels et al., 2008 |
| Lesser Himalaya | 2516 | 4  | Gehrels et al., 2008 |
| Lesser Himalaya | 2518 | 13 | Gehrels et al., 2008 |
| Lesser Himalaya | 2520 | 5  | Gehrels et al., 2008 |
| Lesser Himalaya | 2523 | 9  | Gehrels et al., 2008 |
| Lesser Himalaya | 2523 | 12 | Gehrels et al., 2008 |
| Lesser Himalaya | 2524 | 4  | Gehrels et al., 2008 |
| Lesser Himalaya | 2524 | 7  | Gehrels et al., 2008 |
| Lesser Himalaya | 2524 | 2  | Gehrels et al., 2008 |
| Lesser Himalaya | 2529 | 24 | Gehrels et al., 2008 |
| Lesser Himalaya | 2534 | 6  | Gehrels et al., 2008 |
| Lesser Himalaya | 2534 | 3  | Gehrels et al., 2008 |

[illegible]

|                  |      |    |                      |
|------------------|------|----|----------------------|
| Lesser Himalaya  | 2690 | 9  | Gehrels et al., 2008 |
| Lesser Himalaya  | 2690 | 3  | Gehrels et al., 2008 |
| Lesser Himalaya  | 2693 | 3  | Gehrels et al., 2008 |
| Lesser Himalaya  | 2693 | 2  | Gehrels et al., 2008 |
| Lesser Himalaya  | 2718 | 6  | Gehrels et al., 2008 |
| Lesser Himalaya  | 2720 | 2  | Gehrels et al., 2008 |
| Lesser Himalaya  | 2720 | 3  | Gehrels et al., 2008 |
| Lesser Himalaya  | 2723 | 4  | Gehrels et al., 2008 |
| Lesser Himalaya  | 2728 | 1  | Gehrels et al., 2008 |
| Lesser Himalaya  | 2730 | 4  | Gehrels et al., 2008 |
| Lesser Himalaya  | 2739 | 14 | Gehrels et al., 2008 |
| Lesser Himalaya  | 2753 | 10 | Gehrels et al., 2008 |
| Lesser Himalaya  | 2759 | 14 | Gehrels et al., 2008 |
| Lesser Himalaya  | 2764 | 3  | Gehrels et al., 2008 |
| Lesser Himalaya  | 2769 | 8  | Gehrels et al., 2008 |
| Lesser Himalaya  | 2774 | 5  | Gehrels et al., 2008 |
| Lesser Himalaya  | 2779 | 3  | Gehrels et al., 2008 |
| Lesser Himalaya  | 2779 | 2  | Gehrels et al., 2008 |
| Lesser Himalaya  | 2782 | 5  | Gehrels et al., 2008 |
| Lesser Himalaya  | 2788 | 2  | Gehrels et al., 2008 |
| Lesser Himalaya  | 2793 | 3  | Gehrels et al., 2008 |
| Lesser Himalaya  | 2813 | 8  | Gehrels et al., 2008 |
| Lesser Himalaya  | 2845 | 1  | Gehrels et al., 2008 |
| Lesser Himalaya  | 2846 | 1  | Gehrels et al., 2008 |
| Lesser Himalaya  | 2850 | 3  | Gehrels et al., 2008 |
| Lesser Himalaya  | 2860 | 3  | Gehrels et al., 2008 |
| Lesser Himalaya  | 2900 | 33 | Gehrels et al., 2008 |
| Lesser Himalaya  | 2901 | 2  | Gehrels et al., 2008 |
| Lesser Himalaya  | 2925 | 2  | Gehrels et al., 2008 |
| Lesser Himalaya  | 2943 | 2  | Gehrels et al., 2008 |
| Lesser Himalaya  | 2955 | 2  | Gehrels et al., 2008 |
| Lesser Himalaya  | 2966 | 13 | Gehrels et al., 2008 |
| Lesser Himalaya  | 2991 | 7  | Gehrels et al., 2008 |
| Lesser Himalaya  | 3002 | 3  | Gehrels et al., 2008 |
| Lesser Himalaya  | 3171 | 3  | Gehrels et al., 2008 |
| Lesser Himalaya  | 3232 | 1  | Gehrels et al., 2008 |
| Lesser Himalaya  | 3267 | 7  | Gehrels et al., 2008 |
| Lesser Himalaya  | 3268 | 2  | Gehrels et al., 2008 |
| Lesser Himalaya  | 3301 | 1  | Gehrels et al., 2008 |
| Lesser Himalaya  | 3348 | 1  | Gehrels et al., 2008 |
| Lesser Himalaya  | 3352 | 3  | Gehrels et al., 2008 |
| Lesser Himalaya  | 3455 | 12 | Gehrels et al., 2008 |
| Lesser Himalaya  | 3526 | 7  | Gehrels et al., 2008 |
| Greater Himalaya | 555  | 56 | Gehrels et al., 2008 |
| Greater Himalaya | 575  | 58 | Gehrels et al., 2008 |
| Greater Himalaya | 621  | 10 | Gehrels et al., 2008 |
| Greater Himalaya | 623  | 29 | Gehrels et al., 2008 |
| Greater Himalaya | 630  | 9  | Gehrels et al., 2008 |
| Greater Himalaya | 639  | 24 | Gehrels et al., 2008 |
| Greater Himalaya | 640  | 14 | Gehrels et al., 2008 |
| Greater Himalaya | 653  | 8  | Gehrels et al., 2008 |
| Greater Himalaya | 663  | 8  | Gehrels et al., 2008 |
| Greater Himalaya | 683  | 8  | Gehrels et al., 2008 |
| Greater Himalaya | 693  | 41 | Gehrels et al., 2008 |
| Greater Himalaya | 709  | 3  | Gehrels et al., 2008 |
| Greater Himalaya | 710  | 9  | Gehrels et al., 2008 |
| Greater Himalaya | 715  | 9  | Gehrels et al., 2008 |
| Greater Himalaya | 718  | 9  | Gehrels et al., 2008 |
| Greater Himalaya | 720  | 13 | Gehrels et al., 2008 |
| Greater Himalaya | 727  | 38 | Gehrels et al., 2008 |
| Greater Himalaya | 727  | 73 | Gehrels et al., 2008 |
| Greater Himalaya | 728  | 21 | Gehrels et al., 2008 |
| Greater Himalaya | 734  | 22 | Gehrels et al., 2008 |
| Greater Himalaya | 747  | 75 | Gehrels et al., 2008 |
| Greater Himalaya | 752  | 22 | Gehrels et al., 2008 |
| Greater Himalaya | 752  | 56 | Gehrels et al., 2008 |
| Greater Himalaya | 756  | 8  | Gehrels et al., 2008 |
| Greater Himalaya | 757  | 76 | Gehrels et al., 2008 |
| Greater Himalaya | 759  | 8  | Gehrels et al., 2008 |
| Greater Himalaya | 767  | 9  | Gehrels et al., 2008 |
| Greater Himalaya | 767  | 77 | Gehrels et al., 2008 |

|                  |     |    |                      |
|------------------|-----|----|----------------------|
| Greater Himalaya | 770 | 29 | Gehrels et al., 2008 |
| Greater Himalaya | 776 | 24 | Gehrels et al., 2008 |
| Greater Himalaya | 789 | 19 | Gehrels et al., 2008 |
| Greater Himalaya | 807 | 46 | Gehrels et al., 2008 |
| Greater Himalaya | 808 | 10 | Gehrels et al., 2008 |
| Greater Himalaya | 808 | 10 | Gehrels et al., 2008 |
| Greater Himalaya | 813 | 12 | Gehrels et al., 2008 |
| Greater Himalaya | 815 | 21 | Gehrels et al., 2008 |
| Greater Himalaya | 816 | 4  | Gehrels et al., 2008 |
| Greater Himalaya | 821 | 14 | Gehrels et al., 2008 |
| Greater Himalaya | 831 | 9  | Gehrels et al., 2008 |
| Greater Himalaya | 833 | 10 | Gehrels et al., 2008 |
| Greater Himalaya | 833 | 26 | Gehrels et al., 2008 |
| Greater Himalaya | 834 | 22 | Gehrels et al., 2008 |
| Greater Himalaya | 843 | 55 | Gehrels et al., 2008 |
| Greater Himalaya | 846 | 23 | Gehrels et al., 2008 |
| Greater Himalaya | 848 | 6  | Gehrels et al., 2008 |
| Greater Himalaya | 848 | 25 | Gehrels et al., 2008 |
| Greater Himalaya | 850 | 33 | Gehrels et al., 2008 |
| Greater Himalaya | 858 | 9  | Gehrels et al., 2008 |
| Greater Himalaya | 862 | 41 | Gehrels et al., 2008 |
| Greater Himalaya | 863 | 11 | Gehrels et al., 2008 |
| Greater Himalaya | 864 | 13 | Gehrels et al., 2008 |
| Greater Himalaya | 865 | 5  | Gehrels et al., 2008 |
| Greater Himalaya | 866 | 8  | Gehrels et al., 2008 |
| Greater Himalaya | 869 | 11 | Gehrels et al., 2008 |
| Greater Himalaya | 870 | 35 | Gehrels et al., 2008 |
| Greater Himalaya | 870 | 39 | Gehrels et al., 2008 |
| Greater Himalaya | 871 | 42 | Gehrels et al., 2008 |
| Greater Himalaya | 872 | 11 | Gehrels et al., 2008 |
| Greater Himalaya | 873 | 23 | Gehrels et al., 2008 |
| Greater Himalaya | 875 | 13 | Gehrels et al., 2008 |
| Greater Himalaya | 876 | 7  | Gehrels et al., 2008 |
| Greater Himalaya | 877 | 7  | Gehrels et al., 2008 |
| Greater Himalaya | 879 | 14 | Gehrels et al., 2008 |
| Greater Himalaya | 879 | 18 | Gehrels et al., 2008 |
| Greater Himalaya | 884 | 21 | Gehrels et al., 2008 |
| Greater Himalaya | 887 | 11 | Gehrels et al., 2008 |
| Greater Himalaya | 888 | 20 | Gehrels et al., 2008 |
| Greater Himalaya | 888 | 11 | Gehrels et al., 2008 |
| Greater Himalaya | 888 | 17 | Gehrels et al., 2008 |
| Greater Himalaya | 894 | 21 | Gehrels et al., 2008 |
| Greater Himalaya | 894 | 11 | Gehrels et al., 2008 |
| Greater Himalaya | 895 | 22 | Gehrels et al., 2008 |
| Greater Himalaya | 895 | 10 | Gehrels et al., 2008 |
| Greater Himalaya | 895 | 7  | Gehrels et al., 2008 |
| Greater Himalaya | 898 | 12 | Gehrels et al., 2008 |
| Greater Himalaya | 899 | 11 | Gehrels et al., 2008 |
| Greater Himalaya | 899 | 4  | Gehrels et al., 2008 |
| Greater Himalaya | 899 | 54 | Gehrels et al., 2008 |
| Greater Himalaya | 900 | 22 | Gehrels et al., 2008 |
| Greater Himalaya | 900 | 26 | Gehrels et al., 2008 |
| Greater Himalaya | 902 | 5  | Gehrels et al., 2008 |
| Greater Himalaya | 902 | 17 | Gehrels et al., 2008 |
| Greater Himalaya | 905 | 11 | Gehrels et al., 2008 |
| Greater Himalaya | 907 | 11 | Gehrels et al., 2008 |
| Greater Himalaya | 908 | 11 | Gehrels et al., 2008 |
| Greater Himalaya | 910 | 13 | Gehrels et al., 2008 |
| Greater Himalaya | 910 | 7  | Gehrels et al., 2008 |
| Greater Himalaya | 910 | 8  | Gehrels et al., 2008 |
| Greater Himalaya | 912 | 21 | Gehrels et al., 2008 |
| Greater Himalaya | 916 | 15 | Gehrels et al., 2008 |
| Greater Himalaya | 916 | 19 | Gehrels et al., 2008 |
| Greater Himalaya | 917 | 14 | Gehrels et al., 2008 |
| Greater Himalaya | 918 | 13 | Gehrels et al., 2008 |
| Greater Himalaya | 920 | 11 | Gehrels et al., 2008 |
| Greater Himalaya | 922 | 4  | Gehrels et al., 2008 |
| Greater Himalaya | 924 | 30 | Gehrels et al., 2008 |
| Greater Himalaya | 924 | 21 | Gehrels et al., 2008 |
| Greater Himalaya | 925 | 7  | Gehrels et al., 2008 |
| Greater Himalaya | 925 | 30 | Gehrels et al., 2008 |

|                  |      |    |                      |
|------------------|------|----|----------------------|
| Greater Himalaya | 927  | 20 | Gehrels et al., 2008 |
| Greater Himalaya | 930  | 13 | Gehrels et al., 2008 |
| Greater Himalaya | 935  | 5  | Gehrels et al., 2008 |
| Greater Himalaya | 936  | 21 | Gehrels et al., 2008 |
| Greater Himalaya | 936  | 13 | Gehrels et al., 2008 |
| Greater Himalaya | 939  | 25 | Gehrels et al., 2008 |
| Greater Himalaya | 941  | 20 | Gehrels et al., 2008 |
| Greater Himalaya | 942  | 11 | Gehrels et al., 2008 |
| Greater Himalaya | 942  | 5  | Gehrels et al., 2008 |
| Greater Himalaya | 946  | 21 | Gehrels et al., 2008 |
| Greater Himalaya | 946  | 21 | Gehrels et al., 2008 |
| Greater Himalaya | 947  | 10 | Gehrels et al., 2008 |
| Greater Himalaya | 947  | 8  | Gehrels et al., 2008 |
| Greater Himalaya | 950  | 11 | Gehrels et al., 2008 |
| Greater Himalaya | 950  | 33 | Gehrels et al., 2008 |
| Greater Himalaya | 950  | 19 | Gehrels et al., 2008 |
| Greater Himalaya | 952  | 23 | Gehrels et al., 2008 |
| Greater Himalaya | 953  | 35 | Gehrels et al., 2008 |
| Greater Himalaya | 955  | 13 | Gehrels et al., 2008 |
| Greater Himalaya | 956  | 6  | Gehrels et al., 2008 |
| Greater Himalaya | 956  | 96 | Gehrels et al., 2008 |
| Greater Himalaya | 958  | 5  | Gehrels et al., 2008 |
| Greater Himalaya | 959  | 13 | Gehrels et al., 2008 |
| Greater Himalaya | 962  | 25 | Gehrels et al., 2008 |
| Greater Himalaya | 963  | 14 | Gehrels et al., 2008 |
| Greater Himalaya | 964  | 21 | Gehrels et al., 2008 |
| Greater Himalaya | 964  | 8  | Gehrels et al., 2008 |
| Greater Himalaya | 968  | 12 | Gehrels et al., 2008 |
| Greater Himalaya | 968  | 3  | Gehrels et al., 2008 |
| Greater Himalaya | 970  | 15 | Gehrels et al., 2008 |
| Greater Himalaya | 970  | 5  | Gehrels et al., 2008 |
| Greater Himalaya | 971  | 11 | Gehrels et al., 2008 |
| Greater Himalaya | 971  | 51 | Gehrels et al., 2008 |
| Greater Himalaya | 972  | 23 | Gehrels et al., 2008 |
| Greater Himalaya | 972  | 12 | Gehrels et al., 2008 |
| Greater Himalaya | 973  | 11 | Gehrels et al., 2008 |
| Greater Himalaya | 974  | 21 | Gehrels et al., 2008 |
| Greater Himalaya | 976  | 13 | Gehrels et al., 2008 |
| Greater Himalaya | 978  | 9  | Gehrels et al., 2008 |
| Greater Himalaya | 982  | 21 | Gehrels et al., 2008 |
| Greater Himalaya | 982  | 7  | Gehrels et al., 2008 |
| Greater Himalaya | 982  | 43 | Gehrels et al., 2008 |
| Greater Himalaya | 982  | 44 | Gehrels et al., 2008 |
| Greater Himalaya | 986  | 30 | Gehrels et al., 2008 |
| Greater Himalaya | 988  | 69 | Gehrels et al., 2008 |
| Greater Himalaya | 988  | 10 | Gehrels et al., 2008 |
| Greater Himalaya | 989  | 28 | Gehrels et al., 2008 |
| Greater Himalaya | 990  | 12 | Gehrels et al., 2008 |
| Greater Himalaya | 993  | 6  | Gehrels et al., 2008 |
| Greater Himalaya | 994  | 37 | Gehrels et al., 2008 |
| Greater Himalaya | 994  | 45 | Gehrels et al., 2008 |
| Greater Himalaya | 999  | 15 | Gehrels et al., 2008 |
| Greater Himalaya | 1002 | 14 | Gehrels et al., 2008 |
| Greater Himalaya | 1002 | 32 | Gehrels et al., 2008 |
| Greater Himalaya | 1004 | 12 | Gehrels et al., 2008 |
| Greater Himalaya | 1005 | 79 | Gehrels et al., 2008 |
| Greater Himalaya | 1006 | 23 | Gehrels et al., 2008 |
| Greater Himalaya | 1010 | 21 | Gehrels et al., 2008 |
| Greater Himalaya | 1011 | 21 | Gehrels et al., 2008 |
| Greater Himalaya | 1012 | 21 | Gehrels et al., 2008 |
| Greater Himalaya | 1013 | 19 | Gehrels et al., 2008 |
| Greater Himalaya | 1015 | 20 | Gehrels et al., 2008 |
| Greater Himalaya | 1017 | 17 | Gehrels et al., 2008 |
| Greater Himalaya | 1018 | 20 | Gehrels et al., 2008 |
| Greater Himalaya | 1019 | 21 | Gehrels et al., 2008 |
| Greater Himalaya | 1019 | 34 | Gehrels et al., 2008 |
| Greater Himalaya | 1019 | 50 | Gehrels et al., 2008 |
| Greater Himalaya | 1023 | 8  | Gehrels et al., 2008 |
| Greater Himalaya | 1024 | 22 | Gehrels et al., 2008 |
| Greater Himalaya | 1027 | 20 | Gehrels et al., 2008 |
| Greater Himalaya | 1027 | 23 | Gehrels et al., 2008 |

[illegible]

|                  |      |     |                      |
|------------------|------|-----|----------------------|
| Greater Himalaya | 1093 | 72  | Gehrels et al., 2008 |
| Greater Himalaya | 1093 | 28  | Gehrels et al., 2008 |
| Greater Himalaya | 1097 | 105 | Gehrels et al., 2008 |
| Greater Himalaya | 1098 | 22  | Gehrels et al., 2008 |
| Greater Himalaya | 1100 | 28  | Gehrels et al., 2008 |
| Greater Himalaya | 1106 | 20  | Gehrels et al., 2008 |
| Greater Himalaya | 1107 | 41  | Gehrels et al., 2008 |
| Greater Himalaya | 1109 | 26  | Gehrels et al., 2008 |
| Greater Himalaya | 1110 | 15  | Gehrels et al., 2008 |
| Greater Himalaya | 1111 | 20  | Gehrels et al., 2008 |
| Greater Himalaya | 1112 | 22  | Gehrels et al., 2008 |
| Greater Himalaya | 1113 | 45  | Gehrels et al., 2008 |
| Greater Himalaya | 1113 | 19  | Gehrels et al., 2008 |
| Greater Himalaya | 1113 | 5   | Gehrels et al., 2008 |
| Greater Himalaya | 1114 | 42  | Gehrels et al., 2008 |
| Greater Himalaya | 1114 | 13  | Gehrels et al., 2008 |
| Greater Himalaya | 1114 | 37  | Gehrels et al., 2008 |
| Greater Himalaya | 1117 | 32  | Gehrels et al., 2008 |
| Greater Himalaya | 1118 | 79  | Gehrels et al., 2008 |
| Greater Himalaya | 1120 | 20  | Gehrels et al., 2008 |
| Greater Himalaya | 1120 | 5   | Gehrels et al., 2008 |
| Greater Himalaya | 1125 | 20  | Gehrels et al., 2008 |
| Greater Himalaya | 1126 | 5   | Gehrels et al., 2008 |
| Greater Himalaya | 1127 | 20  | Gehrels et al., 2008 |
| Greater Himalaya | 1129 | 18  | Gehrels et al., 2008 |
| Greater Himalaya | 1132 | 20  | Gehrels et al., 2008 |
| Greater Himalaya | 1132 | 23  | Gehrels et al., 2008 |
| Greater Himalaya | 1135 | 21  | Gehrels et al., 2008 |
| Greater Himalaya | 1137 | 20  | Gehrels et al., 2008 |
| Greater Himalaya | 1137 | 15  | Gehrels et al., 2008 |
| Greater Himalaya | 1137 | 20  | Gehrels et al., 2008 |
| Greater Himalaya | 1137 | 5   | Gehrels et al., 2008 |
| Greater Himalaya | 1138 | 20  | Gehrels et al., 2008 |
| Greater Himalaya | 1138 | 20  | Gehrels et al., 2008 |
| Greater Himalaya | 1140 | 15  | Gehrels et al., 2008 |
| Greater Himalaya | 1141 | 15  | Gehrels et al., 2008 |
| Greater Himalaya | 1142 | 10  | Gehrels et al., 2008 |
| Greater Himalaya | 1143 | 20  | Gehrels et al., 2008 |
| Greater Himalaya | 1144 | 24  | Gehrels et al., 2008 |
| Greater Himalaya | 1145 | 16  | Gehrels et al., 2008 |
| Greater Himalaya | 1146 | 7   | Gehrels et al., 2008 |
| Greater Himalaya | 1147 | 26  | Gehrels et al., 2008 |
| Greater Himalaya | 1148 | 20  | Gehrels et al., 2008 |
| Greater Himalaya | 1152 | 11  | Gehrels et al., 2008 |
| Greater Himalaya | 1153 | 20  | Gehrels et al., 2008 |
| Greater Himalaya | 1154 | 38  | Gehrels et al., 2008 |
| Greater Himalaya | 1154 | 32  | Gehrels et al., 2008 |
| Greater Himalaya | 1155 | 57  | Gehrels et al., 2008 |
| Greater Himalaya | 1156 | 44  | Gehrels et al., 2008 |
| Greater Himalaya | 1157 | 20  | Gehrels et al., 2008 |
| Greater Himalaya | 1162 | 20  | Gehrels et al., 2008 |
| Greater Himalaya | 1162 | 20  | Gehrels et al., 2008 |
| Greater Himalaya | 1162 | 37  | Gehrels et al., 2008 |
| Greater Himalaya | 1164 | 28  | Gehrels et al., 2008 |
| Greater Himalaya | 1164 | 22  | Gehrels et al., 2008 |
| Greater Himalaya | 1164 | 28  | Gehrels et al., 2008 |
| Greater Himalaya | 1166 | 35  | Gehrels et al., 2008 |
| Greater Himalaya | 1166 | 28  | Gehrels et al., 2008 |
| Greater Himalaya | 1167 | 20  | Gehrels et al., 2008 |
| Greater Himalaya | 1167 | 20  | Gehrels et al., 2008 |
| Greater Himalaya | 1169 | 24  | Gehrels et al., 2008 |
| Greater Himalaya | 1169 | 24  | Gehrels et al., 2008 |
| Greater Himalaya | 1171 | 20  | Gehrels et al., 2008 |
| Greater Himalaya | 1171 | 22  | Gehrels et al., 2008 |
| Greater Himalaya | 1171 | 5   | Gehrels et al., 2008 |
| Greater Himalaya | 1174 | 7   | Gehrels et al., 2008 |
| Greater Himalaya | 1174 | 16  | Gehrels et al., 2008 |
| Greater Himalaya | 1176 | 20  | Gehrels et al., 2008 |
| Greater Himalaya | 1176 | 3   | Gehrels et al., 2008 |
| Greater Himalaya | 1177 | 25  | Gehrels et al., 2008 |
| Greater Himalaya | 1178 | 17  | Gehrels et al., 2008 |

|                  |      |    |                      |
|------------------|------|----|----------------------|
| Greater Himalaya | 1179 | 20 | Gehrels et al., 2008 |
| Greater Himalaya | 1179 | 15 | Gehrels et al., 2008 |
| Greater Himalaya | 1181 | 24 | Gehrels et al., 2008 |
| Greater Himalaya | 1181 | 24 | Gehrels et al., 2008 |
| Greater Himalaya | 1182 | 21 | Gehrels et al., 2008 |
| Greater Himalaya | 1188 | 22 | Gehrels et al., 2008 |
| Greater Himalaya | 1188 | 10 | Gehrels et al., 2008 |
| Greater Himalaya | 1188 | 32 | Gehrels et al., 2008 |
| Greater Himalaya | 1193 | 20 | Gehrels et al., 2008 |
| Greater Himalaya | 1198 | 21 | Gehrels et al., 2008 |
| Greater Himalaya | 1198 | 9  | Gehrels et al., 2008 |
| Greater Himalaya | 1199 | 23 | Gehrels et al., 2008 |
| Greater Himalaya | 1199 | 23 | Gehrels et al., 2008 |
| Greater Himalaya | 1201 | 64 | Gehrels et al., 2008 |
| Greater Himalaya | 1203 | 21 | Gehrels et al., 2008 |
| Greater Himalaya | 1203 | 20 | Gehrels et al., 2008 |
| Greater Himalaya | 1203 | 21 | Gehrels et al., 2008 |
| Greater Himalaya | 1205 | 35 | Gehrels et al., 2008 |
| Greater Himalaya | 1208 | 25 | Gehrels et al., 2008 |
| Greater Himalaya | 1208 | 25 | Gehrels et al., 2008 |
| Greater Himalaya | 1208 | 38 | Gehrels et al., 2008 |
| Greater Himalaya | 1209 | 8  | Gehrels et al., 2008 |
| Greater Himalaya | 1211 | 57 | Gehrels et al., 2008 |
| Greater Himalaya | 1215 | 25 | Gehrels et al., 2008 |
| Greater Himalaya | 1215 | 25 | Gehrels et al., 2008 |
| Greater Himalaya | 1215 | 29 | Gehrels et al., 2008 |
| Greater Himalaya | 1218 | 11 | Gehrels et al., 2008 |
| Greater Himalaya | 1220 | 20 | Gehrels et al., 2008 |
| Greater Himalaya | 1220 | 20 | Gehrels et al., 2008 |
| Greater Himalaya | 1220 | 4  | Gehrels et al., 2008 |
| Greater Himalaya | 1220 | 3  | Gehrels et al., 2008 |
| Greater Himalaya | 1222 | 24 | Gehrels et al., 2008 |
| Greater Himalaya | 1226 | 21 | Gehrels et al., 2008 |
| Greater Himalaya | 1226 | 11 | Gehrels et al., 2008 |
| Greater Himalaya | 1234 | 20 | Gehrels et al., 2008 |
| Greater Himalaya | 1241 | 20 | Gehrels et al., 2008 |
| Greater Himalaya | 1250 | 18 | Gehrels et al., 2008 |
| Greater Himalaya | 1252 | 25 | Gehrels et al., 2008 |
| Greater Himalaya | 1256 | 20 | Gehrels et al., 2008 |
| Greater Himalaya | 1256 | 6  | Gehrels et al., 2008 |
| Greater Himalaya | 1258 | 36 | Gehrels et al., 2008 |
| Greater Himalaya | 1261 | 21 | Gehrels et al., 2008 |
| Greater Himalaya | 1261 | 24 | Gehrels et al., 2008 |
| Greater Himalaya | 1261 | 21 | Gehrels et al., 2008 |
| Greater Himalaya | 1261 | 13 | Gehrels et al., 2008 |
| Greater Himalaya | 1269 | 41 | Gehrels et al., 2008 |
| Greater Himalaya | 1269 | 36 | Gehrels et al., 2008 |
| Greater Himalaya | 1271 | 42 | Gehrels et al., 2008 |
| Greater Himalaya | 1271 | 9  | Gehrels et al., 2008 |
| Greater Himalaya | 1271 | 37 | Gehrels et al., 2008 |
| Greater Himalaya | 1273 | 55 | Gehrels et al., 2008 |
| Greater Himalaya | 1274 | 23 | Gehrels et al., 2008 |
| Greater Himalaya | 1274 | 11 | Gehrels et al., 2008 |
| Greater Himalaya | 1282 | 20 | Gehrels et al., 2008 |
| Greater Himalaya | 1288 | 22 | Gehrels et al., 2008 |
| Greater Himalaya | 1292 | 22 | Gehrels et al., 2008 |
| Greater Himalaya | 1292 | 10 | Gehrels et al., 2008 |
| Greater Himalaya | 1293 | 4  | Gehrels et al., 2008 |
| Greater Himalaya | 1296 | 37 | Gehrels et al., 2008 |
| Greater Himalaya | 1300 | 6  | Gehrels et al., 2008 |
| Greater Himalaya | 1301 | 7  | Gehrels et al., 2008 |
| Greater Himalaya | 1311 | 7  | Gehrels et al., 2008 |
| Greater Himalaya | 1314 | 50 | Gehrels et al., 2008 |
| Greater Himalaya | 1316 | 4  | Gehrels et al., 2008 |
| Greater Himalaya | 1321 | 23 | Gehrels et al., 2008 |
| Greater Himalaya | 1323 | 18 | Gehrels et al., 2008 |
| Greater Himalaya | 1325 | 14 | Gehrels et al., 2008 |
| Greater Himalaya | 1328 | 14 | Gehrels et al., 2008 |
| Greater Himalaya | 1345 | 56 | Gehrels et al., 2008 |
| Greater Himalaya | 1370 | 20 | Gehrels et al., 2008 |
| Greater Himalaya | 1379 | 19 | Gehrels et al., 2008 |



|                  |      |     |                      |
|------------------|------|-----|----------------------|
| Greater Himalaya | 1383 | 20  | Gehrels et al., 2008 |
| Greater Himalaya | 1383 | 20  | Gehrels et al., 2008 |
| Greater Himalaya | 1383 | 15  | Gehrels et al., 2008 |
| Greater Himalaya | 1394 | 21  | Gehrels et al., 2008 |
| Greater Himalaya | 1395 | 3   | Gehrels et al., 2008 |
| Greater Himalaya | 1401 | 21  | Gehrels et al., 2008 |
| Greater Himalaya | 1401 | 21  | Gehrels et al., 2008 |
| Greater Himalaya | 1402 | 42  | Gehrels et al., 2008 |
| Greater Himalaya | 1408 | 10  | Gehrels et al., 2008 |
| Greater Himalaya | 1415 | 55  | Gehrels et al., 2008 |
| Greater Himalaya | 1415 | 52  | Gehrels et al., 2008 |
| Greater Himalaya | 1415 | 16  | Gehrels et al., 2008 |
| Greater Himalaya | 1415 | 4   | Gehrels et al., 2008 |
| Greater Himalaya | 1417 | 26  | Gehrels et al., 2008 |
| Greater Himalaya | 1440 | 36  | Gehrels et al., 2008 |
| Greater Himalaya | 1440 | 30  | Gehrels et al., 2008 |
| Greater Himalaya | 1450 | 126 | Gehrels et al., 2008 |
| Greater Himalaya | 1452 | 20  | Gehrels et al., 2008 |
| Greater Himalaya | 1460 | 7   | Gehrels et al., 2008 |
| Greater Himalaya | 1468 | 20  | Gehrels et al., 2008 |
| Greater Himalaya | 1468 | 20  | Gehrels et al., 2008 |
| Greater Himalaya | 1485 | 26  | Gehrels et al., 2008 |
| Greater Himalaya | 1489 | 11  | Gehrels et al., 2008 |
| Greater Himalaya | 1497 | 19  | Gehrels et al., 2008 |
| Greater Himalaya | 1497 | 5   | Gehrels et al., 2008 |
| Greater Himalaya | 1509 | 28  | Gehrels et al., 2008 |
| Greater Himalaya | 1511 | 19  | Gehrels et al., 2008 |
| Greater Himalaya | 1511 | 19  | Gehrels et al., 2008 |
| Greater Himalaya | 1511 | 6   | Gehrels et al., 2008 |
| Greater Himalaya | 1517 | 19  | Gehrels et al., 2008 |
| Greater Himalaya | 1517 | 19  | Gehrels et al., 2008 |
| Greater Himalaya | 1518 | 49  | Gehrels et al., 2008 |
| Greater Himalaya | 1539 | 24  | Gehrels et al., 2008 |
| Greater Himalaya | 1539 | 15  | Gehrels et al., 2008 |
| Greater Himalaya | 1542 | 19  | Gehrels et al., 2008 |
| Greater Himalaya | 1544 | 15  | Gehrels et al., 2008 |
| Greater Himalaya | 1548 | 10  | Gehrels et al., 2008 |
| Greater Himalaya | 1549 | 19  | Gehrels et al., 2008 |
| Greater Himalaya | 1549 | 4   | Gehrels et al., 2008 |
| Greater Himalaya | 1551 | 21  | Gehrels et al., 2008 |
| Greater Himalaya | 1551 | 9   | Gehrels et al., 2008 |
| Greater Himalaya | 1554 | 8   | Gehrels et al., 2008 |
| Greater Himalaya | 1556 | 6   | Gehrels et al., 2008 |
| Greater Himalaya | 1573 | 19  | Gehrels et al., 2008 |
| Greater Himalaya | 1573 | 19  | Gehrels et al., 2008 |
| Greater Himalaya | 1574 | 3   | Gehrels et al., 2008 |
| Greater Himalaya | 1586 | 16  | Gehrels et al., 2008 |
| Greater Himalaya | 1589 | 6   | Gehrels et al., 2008 |
| Greater Himalaya | 1594 | 19  | Gehrels et al., 2008 |
| Greater Himalaya | 1594 | 4   | Gehrels et al., 2008 |
| Greater Himalaya | 1595 | 16  | Gehrels et al., 2008 |
| Greater Himalaya | 1607 | 20  | Gehrels et al., 2008 |
| Greater Himalaya | 1607 | 20  | Gehrels et al., 2008 |
| Greater Himalaya | 1609 | 38  | Gehrels et al., 2008 |
| Greater Himalaya | 1610 | 23  | Gehrels et al., 2008 |
| Greater Himalaya | 1610 | 13  | Gehrels et al., 2008 |
| Greater Himalaya | 1615 | 7   | Gehrels et al., 2008 |
| Greater Himalaya | 1621 | 12  | Gehrels et al., 2008 |
| Greater Himalaya | 1625 | 10  | Gehrels et al., 2008 |
| Greater Himalaya | 1626 | 9   | Gehrels et al., 2008 |
| Greater Himalaya | 1629 | 6   | Gehrels et al., 2008 |
| Greater Himalaya | 1630 | 44  | Gehrels et al., 2008 |
| Greater Himalaya | 1639 | 6   | Gehrels et al., 2008 |
| Greater Himalaya | 1641 | 5   | Gehrels et al., 2008 |
| Greater Himalaya | 1641 | 15  | Gehrels et al., 2008 |
| Greater Himalaya | 1641 | 13  | Gehrels et al., 2008 |
| Greater Himalaya | 1652 | 20  | Gehrels et al., 2008 |
| Greater Himalaya | 1652 | 10  | Gehrels et al., 2008 |
| Greater Himalaya | 1653 | 12  | Gehrels et al., 2008 |
| Greater Himalaya | 1657 | 19  | Gehrels et al., 2008 |
| Greater Himalaya | 1657 | 4   | Gehrels et al., 2008 |

|                  |      |    |                      |
|------------------|------|----|----------------------|
| Greater Himalaya | 1662 | 64 | Gehrels et al., 2008 |
| Greater Himalaya | 1663 | 80 | Gehrels et al., 2008 |
| Greater Himalaya | 1664 | 13 | Gehrels et al., 2008 |
| Greater Himalaya | 1664 | 8  | Gehrels et al., 2008 |
| Greater Himalaya | 1666 | 21 | Gehrels et al., 2008 |
| Greater Himalaya | 1666 | 19 | Gehrels et al., 2008 |
| Greater Himalaya | 1666 | 49 | Gehrels et al., 2008 |
| Greater Himalaya | 1666 | 21 | Gehrels et al., 2008 |
| Greater Himalaya | 1666 | 19 | Gehrels et al., 2008 |
| Greater Himalaya | 1667 | 19 | Gehrels et al., 2008 |
| Greater Himalaya | 1669 | 12 | Gehrels et al., 2008 |
| Greater Himalaya | 1673 | 14 | Gehrels et al., 2008 |
| Greater Himalaya | 1682 | 81 | Gehrels et al., 2008 |
| Greater Himalaya | 1690 | 5  | Gehrels et al., 2008 |
| Greater Himalaya | 1691 | 12 | Gehrels et al., 2008 |
| Greater Himalaya | 1694 | 19 | Gehrels et al., 2008 |
| Greater Himalaya | 1696 | 8  | Gehrels et al., 2008 |
| Greater Himalaya | 1698 | 28 | Gehrels et al., 2008 |
| Greater Himalaya | 1704 | 18 | Gehrels et al., 2008 |
| Greater Himalaya | 1706 | 29 | Gehrels et al., 2008 |
| Greater Himalaya | 1707 | 21 | Gehrels et al., 2008 |
| Greater Himalaya | 1707 | 19 | Gehrels et al., 2008 |
| Greater Himalaya | 1707 | 11 | Gehrels et al., 2008 |
| Greater Himalaya | 1707 | 4  | Gehrels et al., 2008 |
| Greater Himalaya | 1715 | 8  | Gehrels et al., 2008 |
| Greater Himalaya | 1745 | 19 | Gehrels et al., 2008 |
| Greater Himalaya | 1745 | 19 | Gehrels et al., 2008 |
| Greater Himalaya | 1747 | 9  | Gehrels et al., 2008 |
| Greater Himalaya | 1751 | 20 | Gehrels et al., 2008 |
| Greater Himalaya | 1752 | 19 | Gehrels et al., 2008 |
| Greater Himalaya | 1754 | 12 | Gehrels et al., 2008 |
| Greater Himalaya | 1759 | 4  | Gehrels et al., 2008 |
| Greater Himalaya | 1760 | 24 | Gehrels et al., 2008 |
| Greater Himalaya | 1762 | 5  | Gehrels et al., 2008 |
| Greater Himalaya | 1777 | 8  | Gehrels et al., 2008 |
| Greater Himalaya | 1782 | 22 | Gehrels et al., 2008 |
| Greater Himalaya | 1782 | 12 | Gehrels et al., 2008 |
| Greater Himalaya | 1787 | 18 | Gehrels et al., 2008 |
| Greater Himalaya | 1791 | 19 | Gehrels et al., 2008 |
| Greater Himalaya | 1791 | 19 | Gehrels et al., 2008 |
| Greater Himalaya | 1807 | 8  | Gehrels et al., 2008 |
| Greater Himalaya | 1813 | 23 | Gehrels et al., 2008 |
| Greater Himalaya | 1814 | 33 | Gehrels et al., 2008 |
| Greater Himalaya | 1814 | 33 | Gehrels et al., 2008 |
| Greater Himalaya | 1815 | 24 | Gehrels et al., 2008 |
| Greater Himalaya | 1831 | 18 | Gehrels et al., 2008 |
| Greater Himalaya | 1832 | 18 | Gehrels et al., 2008 |
| Greater Himalaya | 1843 | 6  | Gehrels et al., 2008 |
| Greater Himalaya | 1851 | 35 | Gehrels et al., 2008 |
| Greater Himalaya | 1853 | 8  | Gehrels et al., 2008 |
| Greater Himalaya | 1870 | 11 | Gehrels et al., 2008 |
| Greater Himalaya | 1889 | 16 | Gehrels et al., 2008 |
| Greater Himalaya | 1900 | 18 | Gehrels et al., 2008 |
| Greater Himalaya | 1900 | 5  | Gehrels et al., 2008 |
| Greater Himalaya | 1904 | 3  | Gehrels et al., 2008 |
| Greater Himalaya | 1905 | 18 | Gehrels et al., 2008 |
| Greater Himalaya | 1905 | 5  | Gehrels et al., 2008 |
| Greater Himalaya | 1914 | 7  | Gehrels et al., 2008 |
| Greater Himalaya | 1962 | 18 | Gehrels et al., 2008 |
| Greater Himalaya | 1969 | 19 | Gehrels et al., 2008 |
| Greater Himalaya | 1982 | 18 | Gehrels et al., 2008 |
| Greater Himalaya | 2017 | 20 | Gehrels et al., 2008 |
| Greater Himalaya | 2017 | 9  | Gehrels et al., 2008 |
| Greater Himalaya | 2028 | 18 | Gehrels et al., 2008 |
| Greater Himalaya | 2062 | 3  | Gehrels et al., 2008 |
| Greater Himalaya | 2072 | 18 | Gehrels et al., 2008 |
| Greater Himalaya | 2072 | 6  | Gehrels et al., 2008 |
| Greater Himalaya | 2075 | 16 | Gehrels et al., 2008 |
| Greater Himalaya | 2109 | 19 | Gehrels et al., 2008 |
| Greater Himalaya | 2109 | 7  | Gehrels et al., 2008 |
| Greater Himalaya | 2122 | 23 | Gehrels et al., 2008 |

|                  |      |    |                      |
|------------------|------|----|----------------------|
| Greater Himalaya | 2123 | 18 | Gehrels et al., 2008 |
| Greater Himalaya | 2199 | 11 | Gehrels et al., 2008 |
| Greater Himalaya | 2234 | 17 | Gehrels et al., 2008 |
| Greater Himalaya | 2309 | 19 | Gehrels et al., 2008 |
| Greater Himalaya | 2319 | 21 | Gehrels et al., 2008 |
| Greater Himalaya | 2319 | 13 | Gehrels et al., 2008 |
| Greater Himalaya | 2338 | 17 | Gehrels et al., 2008 |
| Greater Himalaya | 2359 | 4  | Gehrels et al., 2008 |
| Greater Himalaya | 2361 | 17 | Gehrels et al., 2008 |
| Greater Himalaya | 2384 | 17 | Gehrels et al., 2008 |
| Greater Himalaya | 2388 | 6  | Gehrels et al., 2008 |
| Greater Himalaya | 2403 | 11 | Gehrels et al., 2008 |
| Greater Himalaya | 2407 | 26 | Gehrels et al., 2008 |
| Greater Himalaya | 2412 | 8  | Gehrels et al., 2008 |
| Greater Himalaya | 2413 | 5  | Gehrels et al., 2008 |
| Greater Himalaya | 2422 | 4  | Gehrels et al., 2008 |
| Greater Himalaya | 2426 | 11 | Gehrels et al., 2008 |
| Greater Himalaya | 2435 | 18 | Gehrels et al., 2008 |
| Greater Himalaya | 2439 | 21 | Gehrels et al., 2008 |
| Greater Himalaya | 2439 | 12 | Gehrels et al., 2008 |
| Greater Himalaya | 2441 | 21 | Gehrels et al., 2008 |
| Greater Himalaya | 2441 | 5  | Gehrels et al., 2008 |
| Greater Himalaya | 2441 | 13 | Gehrels et al., 2008 |
| Greater Himalaya | 2442 | 32 | Gehrels et al., 2008 |
| Greater Himalaya | 2449 | 18 | Gehrels et al., 2008 |
| Greater Himalaya | 2451 | 17 | Gehrels et al., 2008 |
| Greater Himalaya | 2451 | 5  | Gehrels et al., 2008 |
| Greater Himalaya | 2455 | 6  | Gehrels et al., 2008 |
| Greater Himalaya | 2456 | 17 | Gehrels et al., 2008 |
| Greater Himalaya | 2456 | 17 | Gehrels et al., 2008 |
| Greater Himalaya | 2456 | 18 | Gehrels et al., 2008 |
| Greater Himalaya | 2458 | 18 | Gehrels et al., 2008 |
| Greater Himalaya | 2464 | 17 | Gehrels et al., 2008 |
| Greater Himalaya | 2469 | 3  | Gehrels et al., 2008 |
| Greater Himalaya | 2471 | 17 | Gehrels et al., 2008 |
| Greater Himalaya | 2471 | 4  | Gehrels et al., 2008 |
| Greater Himalaya | 2478 | 3  | Gehrels et al., 2008 |
| Greater Himalaya | 2481 | 10 | Gehrels et al., 2008 |
| Greater Himalaya | 2483 | 8  | Gehrels et al., 2008 |
| Greater Himalaya | 2486 | 7  | Gehrels et al., 2008 |
| Greater Himalaya | 2488 | 17 | Gehrels et al., 2008 |
| Greater Himalaya | 2488 | 5  | Gehrels et al., 2008 |
| Greater Himalaya | 2489 | 17 | Gehrels et al., 2008 |
| Greater Himalaya | 2496 | 17 | Gehrels et al., 2008 |
| Greater Himalaya | 2496 | 22 | Gehrels et al., 2008 |
| Greater Himalaya | 2501 | 9  | Gehrels et al., 2008 |
| Greater Himalaya | 2504 | 17 | Gehrels et al., 2008 |
| Greater Himalaya | 2510 | 17 | Gehrels et al., 2008 |
| Greater Himalaya | 2510 | 5  | Gehrels et al., 2008 |
| Greater Himalaya | 2511 | 11 | Gehrels et al., 2008 |
| Greater Himalaya | 2517 | 11 | Gehrels et al., 2008 |
| Greater Himalaya | 2520 | 17 | Gehrels et al., 2008 |
| Greater Himalaya | 2520 | 6  | Gehrels et al., 2008 |
| Greater Himalaya | 2521 | 17 | Gehrels et al., 2008 |
| Greater Himalaya | 2521 | 17 | Gehrels et al., 2008 |
| Greater Himalaya | 2527 | 32 | Gehrels et al., 2008 |
| Greater Himalaya | 2528 | 6  | Gehrels et al., 2008 |
| Greater Himalaya | 2529 | 17 | Gehrels et al., 2008 |
| Greater Himalaya | 2532 | 17 | Gehrels et al., 2008 |
| Greater Himalaya | 2532 | 5  | Gehrels et al., 2008 |
| Greater Himalaya | 2533 | 30 | Gehrels et al., 2008 |
| Greater Himalaya | 2534 | 17 | Gehrels et al., 2008 |
| Greater Himalaya | 2534 | 5  | Gehrels et al., 2008 |
| Greater Himalaya | 2536 | 23 | Gehrels et al., 2008 |
| Greater Himalaya | 2537 | 17 | Gehrels et al., 2008 |
| Greater Himalaya | 2537 | 17 | Gehrels et al., 2008 |
| Greater Himalaya | 2537 | 17 | Gehrels et al., 2008 |
| Greater Himalaya | 2539 | 17 | Gehrels et al., 2008 |
| Greater Himalaya | 2539 | 17 | Gehrels et al., 2008 |
| Greater Himalaya | 2541 | 21 | Gehrels et al., 2008 |
| Greater Himalaya | 2542 | 17 | Gehrels et al., 2008 |

|                  |      |    |                      |
|------------------|------|----|----------------------|
| Greater Himalaya | 2542 | 17 | Gehrels et al., 2008 |
| Greater Himalaya | 2542 | 17 | Gehrels et al., 2008 |
| Greater Himalaya | 2543 | 17 | Gehrels et al., 2008 |
| Greater Himalaya | 2543 | 17 | Gehrels et al., 2008 |
| Greater Himalaya | 2544 | 12 | Gehrels et al., 2008 |
| Greater Himalaya | 2549 | 6  | Gehrels et al., 2008 |
| Greater Himalaya | 2551 | 17 | Gehrels et al., 2008 |
| Greater Himalaya | 2551 | 4  | Gehrels et al., 2008 |
| Greater Himalaya | 2559 | 10 | Gehrels et al., 2008 |
| Greater Himalaya | 2560 | 17 | Gehrels et al., 2008 |
| Greater Himalaya | 2560 | 4  | Gehrels et al., 2008 |
| Greater Himalaya | 2564 | 17 | Gehrels et al., 2008 |
| Greater Himalaya | 2574 | 17 | Gehrels et al., 2008 |
| Greater Himalaya | 2579 | 14 | Gehrels et al., 2008 |
| Greater Himalaya | 2584 | 17 | Gehrels et al., 2008 |
| Greater Himalaya | 2591 | 17 | Gehrels et al., 2008 |
| Greater Himalaya | 2591 | 17 | Gehrels et al., 2008 |
| Greater Himalaya | 2610 | 17 | Gehrels et al., 2008 |
| Greater Himalaya | 2615 | 17 | Gehrels et al., 2008 |
| Greater Himalaya | 2615 | 6  | Gehrels et al., 2008 |
| Greater Himalaya | 2616 | 3  | Gehrels et al., 2008 |
| Greater Himalaya | 2620 | 1  | Gehrels et al., 2008 |
| Greater Himalaya | 2625 | 20 | Gehrels et al., 2008 |
| Greater Himalaya | 2632 | 3  | Gehrels et al., 2008 |
| Greater Himalaya | 2632 | 15 | Gehrels et al., 2008 |
| Greater Himalaya | 2637 | 17 | Gehrels et al., 2008 |
| Greater Himalaya | 2639 | 2  | Gehrels et al., 2008 |
| Greater Himalaya | 2640 | 17 | Gehrels et al., 2008 |
| Greater Himalaya | 2640 | 4  | Gehrels et al., 2008 |
| Greater Himalaya | 2641 | 17 | Gehrels et al., 2008 |
| Greater Himalaya | 2641 | 6  | Gehrels et al., 2008 |
| Greater Himalaya | 2646 | 2  | Gehrels et al., 2008 |
| Greater Himalaya | 2648 | 24 | Gehrels et al., 2008 |
| Greater Himalaya | 2648 | 24 | Gehrels et al., 2008 |
| Greater Himalaya | 2662 | 7  | Gehrels et al., 2008 |
| Greater Himalaya | 2667 | 18 | Gehrels et al., 2008 |
| Greater Himalaya | 2669 | 6  | Gehrels et al., 2008 |
| Greater Himalaya | 2685 | 19 | Gehrels et al., 2008 |
| Greater Himalaya | 2695 | 23 | Gehrels et al., 2008 |
| Greater Himalaya | 2695 | 16 | Gehrels et al., 2008 |
| Greater Himalaya | 2707 | 6  | Gehrels et al., 2008 |
| Greater Himalaya | 2725 | 17 | Gehrels et al., 2008 |
| Greater Himalaya | 2735 | 10 | Gehrels et al., 2008 |
| Greater Himalaya | 2738 | 3  | Gehrels et al., 2008 |
| Greater Himalaya | 2744 | 17 | Gehrels et al., 2008 |
| Greater Himalaya | 2744 | 6  | Gehrels et al., 2008 |
| Greater Himalaya | 2749 | 1  | Gehrels et al., 2008 |
| Greater Himalaya | 2753 | 16 | Gehrels et al., 2008 |
| Greater Himalaya | 2768 | 3  | Gehrels et al., 2008 |
| Greater Himalaya | 2771 | 2  | Gehrels et al., 2008 |
| Greater Himalaya | 2773 | 17 | Gehrels et al., 2008 |
| Greater Himalaya | 2834 | 16 | Gehrels et al., 2008 |
| Greater Himalaya | 2834 | 4  | Gehrels et al., 2008 |
| Greater Himalaya | 2862 | 8  | Gehrels et al., 2008 |
| Greater Himalaya | 2902 | 22 | Gehrels et al., 2008 |
| Greater Himalaya | 2911 | 14 | Gehrels et al., 2008 |
| Greater Himalaya | 2920 | 22 | Gehrels et al., 2008 |
| Greater Himalaya | 2920 | 15 | Gehrels et al., 2008 |
| Greater Himalaya | 2953 | 18 | Gehrels et al., 2008 |
| Greater Himalaya | 2953 | 8  | Gehrels et al., 2008 |
| Greater Himalaya | 2960 | 16 | Gehrels et al., 2008 |
| Greater Himalaya | 2977 | 16 | Gehrels et al., 2008 |
| Greater Himalaya | 2977 | 6  | Gehrels et al., 2008 |
| Greater Himalaya | 3023 | 18 | Gehrels et al., 2008 |
| Greater Himalaya | 3051 | 16 | Gehrels et al., 2008 |
| Greater Himalaya | 3051 | 7  | Gehrels et al., 2008 |
| Greater Himalaya | 3121 | 16 | Gehrels et al., 2008 |
| Greater Himalaya | 3175 | 16 | Gehrels et al., 2008 |
| Greater Himalaya | 3175 | 16 | Gehrels et al., 2008 |
| Greater Himalaya | 3212 | 9  | Gehrels et al., 2008 |
| Greater Himalaya | 3221 | 16 | Gehrels et al., 2008 |

|                  |      |    |                      |
|------------------|------|----|----------------------|
| Greater Himalaya | 3221 | 7  | Gehrels et al., 2008 |
| Greater Himalaya | 3262 | 12 | Gehrels et al., 2008 |
| Greater Himalaya | 3264 | 16 | Gehrels et al., 2008 |
| Greater Himalaya | 3308 | 1  | Gehrels et al., 2008 |
| Greater Himalaya | 3446 | 19 | Gehrels et al., 2008 |
| Greater Himalaya | 3446 | 11 | Gehrels et al., 2008 |
| Greater Himalaya | 3457 | 16 | Gehrels et al., 2008 |
| Greater Himalaya | 3457 | 5  | Gehrels et al., 2008 |
| Greater Himalaya | 3463 | 16 | Gehrels et al., 2008 |
| Greater Himalaya | 3463 | 16 | Gehrels et al., 2008 |
| Greater Himalaya | 3499 | 2  | Gehrels et al., 2008 |
| Greater Himalaya | 3943 | 15 | Gehrels et al., 2008 |
| Greater Himalaya | 3976 | 15 | Gehrels et al., 2008 |
| Greater Himalaya | 4760 | 15 | Gehrels et al., 2008 |
| Tethys Himalaya  | 420  | 15 | Gehrels et al., 2008 |
| Tethys Himalaya  | 474  | 15 | Gehrels et al., 2008 |
| Tethys Himalaya  | 481  | 10 | Gehrels et al., 2008 |
| Tethys Himalaya  | 484  | 7  | Gehrels et al., 2008 |
| Tethys Himalaya  | 485  | 8  | Gehrels et al., 2008 |
| Tethys Himalaya  | 485  | 6  | Gehrels et al., 2008 |
| Tethys Himalaya  | 485  | 8  | Gehrels et al., 2008 |
| Tethys Himalaya  | 486  | 6  | Gehrels et al., 2008 |
| Tethys Himalaya  | 486  | 8  | Gehrels et al., 2008 |
| Tethys Himalaya  | 489  | 4  | Gehrels et al., 2008 |
| Tethys Himalaya  | 490  | 9  | Gehrels et al., 2008 |
| Tethys Himalaya  | 490  | 6  | Gehrels et al., 2008 |
| Tethys Himalaya  | 491  | 14 | Gehrels et al., 2008 |
| Tethys Himalaya  | 491  | 5  | Gehrels et al., 2008 |
| Tethys Himalaya  | 495  | 12 | Gehrels et al., 2008 |
| Tethys Himalaya  | 495  | 9  | Gehrels et al., 2008 |
| Tethys Himalaya  | 495  | 13 | Gehrels et al., 2008 |
| Tethys Himalaya  | 496  | 7  | Gehrels et al., 2008 |
| Tethys Himalaya  | 496  | 6  | Gehrels et al., 2008 |
| Tethys Himalaya  | 496  | 5  | Gehrels et al., 2008 |
| Tethys Himalaya  | 496  | 7  | Gehrels et al., 2008 |
| Tethys Himalaya  | 496  | 4  | Gehrels et al., 2008 |
| Tethys Himalaya  | 497  | 11 | Gehrels et al., 2008 |
| Tethys Himalaya  | 497  | 6  | Gehrels et al., 2008 |
| Tethys Himalaya  | 497  | 4  | Gehrels et al., 2008 |
| Tethys Himalaya  | 497  | 6  | Gehrels et al., 2008 |
| Tethys Himalaya  | 498  | 6  | Gehrels et al., 2008 |
| Tethys Himalaya  | 499  | 7  | Gehrels et al., 2008 |
| Tethys Himalaya  | 500  | 13 | Gehrels et al., 2008 |
| Tethys Himalaya  | 501  | 11 | Gehrels et al., 2008 |
| Tethys Himalaya  | 502  | 6  | Gehrels et al., 2008 |
| Tethys Himalaya  | 504  | 6  | Gehrels et al., 2008 |
| Tethys Himalaya  | 504  | 29 | Gehrels et al., 2008 |
| Tethys Himalaya  | 504  | 10 | Gehrels et al., 2008 |
| Tethys Himalaya  | 504  | 12 | Gehrels et al., 2008 |
| Tethys Himalaya  | 504  | 17 | Gehrels et al., 2008 |
| Tethys Himalaya  | 505  | 11 | Gehrels et al., 2008 |
| Tethys Himalaya  | 506  | 8  | Gehrels et al., 2008 |
| Tethys Himalaya  | 506  | 5  | Gehrels et al., 2008 |
| Tethys Himalaya  | 508  | 6  | Gehrels et al., 2008 |
| Tethys Himalaya  | 508  | 8  | Gehrels et al., 2008 |
| Tethys Himalaya  | 509  | 6  | Gehrels et al., 2008 |
| Tethys Himalaya  | 510  | 11 | Gehrels et al., 2008 |
| Tethys Himalaya  | 510  | 13 | Gehrels et al., 2008 |
| Tethys Himalaya  | 511  | 9  | Gehrels et al., 2008 |
| Tethys Himalaya  | 511  | 18 | Gehrels et al., 2008 |
| Tethys Himalaya  | 514  | 6  | Gehrels et al., 2008 |
| Tethys Himalaya  | 514  | 8  | Gehrels et al., 2008 |
| Tethys Himalaya  | 515  | 8  | Gehrels et al., 2008 |
| Tethys Himalaya  | 515  | 7  | Gehrels et al., 2008 |
| Tethys Himalaya  | 516  | 7  | Gehrels et al., 2008 |
| Tethys Himalaya  | 516  | 12 | Gehrels et al., 2008 |
| Tethys Himalaya  | 516  | 12 | Gehrels et al., 2008 |
| Tethys Himalaya  | 516  | 4  | Gehrels et al., 2008 |
| Tethys Himalaya  | 517  | 14 | Gehrels et al., 2008 |
| Tethys Himalaya  | 518  | 6  | Gehrels et al., 2008 |
| Tethys Himalaya  | 519  | 10 | Gehrels et al., 2008 |

|                 |     |    |                      |
|-----------------|-----|----|----------------------|
| Tethys Himalaya | 519 | 9  | Gehrels et al., 2008 |
| Tethys Himalaya | 519 | 6  | Gehrels et al., 2008 |
| Tethys Himalaya | 520 | 8  | Gehrels et al., 2008 |
| Tethys Himalaya | 521 | 5  | Gehrels et al., 2008 |
| Tethys Himalaya | 521 | 13 | Gehrels et al., 2008 |
| Tethys Himalaya | 522 | 10 | Gehrels et al., 2008 |
| Tethys Himalaya | 522 | 31 | Gehrels et al., 2008 |
| Tethys Himalaya | 523 | 10 | Gehrels et al., 2008 |
| Tethys Himalaya | 524 | 12 | Gehrels et al., 2008 |
| Tethys Himalaya | 524 | 11 | Gehrels et al., 2008 |
| Tethys Himalaya | 524 | 9  | Gehrels et al., 2008 |
| Tethys Himalaya | 524 | 6  | Gehrels et al., 2008 |
| Tethys Himalaya | 524 | 6  | Gehrels et al., 2008 |
| Tethys Himalaya | 525 | 13 | Gehrels et al., 2008 |
| Tethys Himalaya | 525 | 7  | Gehrels et al., 2008 |
| Tethys Himalaya | 525 | 8  | Gehrels et al., 2008 |
| Tethys Himalaya | 526 | 12 | Gehrels et al., 2008 |
| Tethys Himalaya | 526 | 12 | Gehrels et al., 2008 |
| Tethys Himalaya | 526 | 12 | Gehrels et al., 2008 |
| Tethys Himalaya | 527 | 6  | Gehrels et al., 2008 |
| Tethys Himalaya | 527 | 9  | Gehrels et al., 2008 |
| Tethys Himalaya | 527 | 10 | Gehrels et al., 2008 |
| Tethys Himalaya | 528 | 6  | Gehrels et al., 2008 |
| Tethys Himalaya | 528 | 12 | Gehrels et al., 2008 |
| Tethys Himalaya | 529 | 7  | Gehrels et al., 2008 |
| Tethys Himalaya | 529 | 11 | Gehrels et al., 2008 |
| Tethys Himalaya | 530 | 12 | Gehrels et al., 2008 |
| Tethys Himalaya | 530 | 12 | Gehrels et al., 2008 |
| Tethys Himalaya | 530 | 8  | Gehrels et al., 2008 |
| Tethys Himalaya | 531 | 14 | Gehrels et al., 2008 |
| Tethys Himalaya | 531 | 7  | Gehrels et al., 2008 |
| Tethys Himalaya | 532 | 12 | Gehrels et al., 2008 |
| Tethys Himalaya | 532 | 5  | Gehrels et al., 2008 |
| Tethys Himalaya | 532 | 13 | Gehrels et al., 2008 |
| Tethys Himalaya | 533 | 7  | Gehrels et al., 2008 |
| Tethys Himalaya | 534 | 13 | Gehrels et al., 2008 |
| Tethys Himalaya | 535 | 5  | Gehrels et al., 2008 |
| Tethys Himalaya | 535 | 9  | Gehrels et al., 2008 |
| Tethys Himalaya | 535 | 8  | Gehrels et al., 2008 |
| Tethys Himalaya | 536 | 4  | Gehrels et al., 2008 |
| Tethys Himalaya | 537 | 7  | Gehrels et al., 2008 |
| Tethys Himalaya | 539 | 12 | Gehrels et al., 2008 |
| Tethys Himalaya | 539 | 6  | Gehrels et al., 2008 |
| Tethys Himalaya | 540 | 11 | Gehrels et al., 2008 |
| Tethys Himalaya | 542 | 6  | Gehrels et al., 2008 |
| Tethys Himalaya | 542 | 11 | Gehrels et al., 2008 |
| Tethys Himalaya | 542 | 7  | Gehrels et al., 2008 |
| Tethys Himalaya | 545 | 12 | Gehrels et al., 2008 |
| Tethys Himalaya | 546 | 8  | Gehrels et al., 2008 |
| Tethys Himalaya | 546 | 7  | Gehrels et al., 2008 |
| Tethys Himalaya | 549 | 10 | Gehrels et al., 2008 |
| Tethys Himalaya | 550 | 7  | Gehrels et al., 2008 |
| Tethys Himalaya | 551 | 6  | Gehrels et al., 2008 |
| Tethys Himalaya | 552 | 12 | Gehrels et al., 2008 |
| Tethys Himalaya | 557 | 10 | Gehrels et al., 2008 |
| Tethys Himalaya | 560 | 7  | Gehrels et al., 2008 |
| Tethys Himalaya | 560 | 3  | Gehrels et al., 2008 |
| Tethys Himalaya | 562 | 12 | Gehrels et al., 2008 |
| Tethys Himalaya | 562 | 6  | Gehrels et al., 2008 |
| Tethys Himalaya | 563 | 24 | Gehrels et al., 2008 |
| Tethys Himalaya | 564 | 14 | Gehrels et al., 2008 |
| Tethys Himalaya | 567 | 6  | Gehrels et al., 2008 |
| Tethys Himalaya | 568 | 22 | Gehrels et al., 2008 |
| Tethys Himalaya | 568 | 6  | Gehrels et al., 2008 |
| Tethys Himalaya | 569 | 6  | Gehrels et al., 2008 |
| Tethys Himalaya | 571 | 8  | Gehrels et al., 2008 |
| Tethys Himalaya | 572 | 13 | Gehrels et al., 2008 |
| Tethys Himalaya | 572 | 9  | Gehrels et al., 2008 |
| Tethys Himalaya | 581 | 8  | Gehrels et al., 2008 |
| Tethys Himalaya | 582 | 6  | Gehrels et al., 2008 |
| Tethys Himalaya | 582 | 21 | Gehrels et al., 2008 |

|                 |     |    |                      |
|-----------------|-----|----|----------------------|
| Tethys Himalaya | 583 | 14 | Gehrels et al., 2008 |
| Tethys Himalaya | 586 | 28 | Gehrels et al., 2008 |
| Tethys Himalaya | 588 | 25 | Gehrels et al., 2008 |
| Tethys Himalaya | 595 | 25 | Gehrels et al., 2008 |
| Tethys Himalaya | 596 | 14 | Gehrels et al., 2008 |
| Tethys Himalaya | 596 | 18 | Gehrels et al., 2008 |
| Tethys Himalaya | 598 | 10 | Gehrels et al., 2008 |
| Tethys Himalaya | 601 | 48 | Gehrels et al., 2008 |
| Tethys Himalaya | 602 | 6  | Gehrels et al., 2008 |
| Tethys Himalaya | 607 | 7  | Gehrels et al., 2008 |
| Tethys Himalaya | 608 | 15 | Gehrels et al., 2008 |
| Tethys Himalaya | 609 | 8  | Gehrels et al., 2008 |
| Tethys Himalaya | 614 | 12 | Gehrels et al., 2008 |
| Tethys Himalaya | 617 | 8  | Gehrels et al., 2008 |
| Tethys Himalaya | 620 | 14 | Gehrels et al., 2008 |
| Tethys Himalaya | 622 | 9  | Gehrels et al., 2008 |
| Tethys Himalaya | 626 | 5  | Gehrels et al., 2008 |
| Tethys Himalaya | 627 | 17 | Gehrels et al., 2008 |
| Tethys Himalaya | 632 | 13 | Gehrels et al., 2008 |
| Tethys Himalaya | 634 | 13 | Gehrels et al., 2008 |
| Tethys Himalaya | 637 | 18 | Gehrels et al., 2008 |
| Tethys Himalaya | 641 | 4  | Gehrels et al., 2008 |
| Tethys Himalaya | 643 | 15 | Gehrels et al., 2008 |
| Tethys Himalaya | 645 | 16 | Gehrels et al., 2008 |
| Tethys Himalaya | 646 | 32 | Gehrels et al., 2008 |
| Tethys Himalaya | 652 | 6  | Gehrels et al., 2008 |
| Tethys Himalaya | 653 | 15 | Gehrels et al., 2008 |
| Tethys Himalaya | 654 | 26 | Gehrels et al., 2008 |
| Tethys Himalaya | 654 | 5  | Gehrels et al., 2008 |
| Tethys Himalaya | 657 | 8  | Gehrels et al., 2008 |
| Tethys Himalaya | 659 | 7  | Gehrels et al., 2008 |
| Tethys Himalaya | 659 | 5  | Gehrels et al., 2008 |
| Tethys Himalaya | 669 | 6  | Gehrels et al., 2008 |
| Tethys Himalaya | 669 | 4  | Gehrels et al., 2008 |
| Tethys Himalaya | 671 | 7  | Gehrels et al., 2008 |
| Tethys Himalaya | 675 | 10 | Gehrels et al., 2008 |
| Tethys Himalaya | 680 | 7  | Gehrels et al., 2008 |
| Tethys Himalaya | 682 | 19 | Gehrels et al., 2008 |
| Tethys Himalaya | 691 | 25 | Gehrels et al., 2008 |
| Tethys Himalaya | 694 | 12 | Gehrels et al., 2008 |
| Tethys Himalaya | 695 | 10 | Gehrels et al., 2008 |
| Tethys Himalaya | 695 | 3  | Gehrels et al., 2008 |
| Tethys Himalaya | 696 | 3  | Gehrels et al., 2008 |
| Tethys Himalaya | 697 | 13 | Gehrels et al., 2008 |
| Tethys Himalaya | 704 | 18 | Gehrels et al., 2008 |
| Tethys Himalaya | 705 | 15 | Gehrels et al., 2008 |
| Tethys Himalaya | 708 | 12 | Gehrels et al., 2008 |
| Tethys Himalaya | 722 | 6  | Gehrels et al., 2008 |
| Tethys Himalaya | 723 | 12 | Gehrels et al., 2008 |
| Tethys Himalaya | 725 | 27 | Gehrels et al., 2008 |
| Tethys Himalaya | 730 | 23 | Gehrels et al., 2008 |
| Tethys Himalaya | 734 | 9  | Gehrels et al., 2008 |
| Tethys Himalaya | 734 | 15 | Gehrels et al., 2008 |
| Tethys Himalaya | 736 | 12 | Gehrels et al., 2008 |
| Tethys Himalaya | 740 | 14 | Gehrels et al., 2008 |
| Tethys Himalaya | 742 | 18 | Gehrels et al., 2008 |
| Tethys Himalaya | 746 | 4  | Gehrels et al., 2008 |
| Tethys Himalaya | 747 | 26 | Gehrels et al., 2008 |
| Tethys Himalaya | 751 | 9  | Gehrels et al., 2008 |
| Tethys Himalaya | 752 | 4  | Gehrels et al., 2008 |
| Tethys Himalaya | 754 | 11 | Gehrels et al., 2008 |
| Tethys Himalaya | 756 | 20 | Gehrels et al., 2008 |
| Tethys Himalaya | 759 | 11 | Gehrels et al., 2008 |
| Tethys Himalaya | 761 | 59 | Gehrels et al., 2008 |
| Tethys Himalaya | 762 | 10 | Gehrels et al., 2008 |
| Tethys Himalaya | 763 | 9  | Gehrels et al., 2008 |
| Tethys Himalaya | 764 | 10 | Gehrels et al., 2008 |
| Tethys Himalaya | 769 | 15 | Gehrels et al., 2008 |
| Tethys Himalaya | 770 | 29 | Gehrels et al., 2008 |
| Tethys Himalaya | 770 | 31 | Gehrels et al., 2008 |
| Tethys Himalaya | 770 | 5  | Gehrels et al., 2008 |

|                 |     |    |                      |
|-----------------|-----|----|----------------------|
| Tethys Himalaya | 771 | 10 | Gehrels et al., 2008 |
| Tethys Himalaya | 772 | 4  | Gehrels et al., 2008 |
| Tethys Himalaya | 773 | 29 | Gehrels et al., 2008 |
| Tethys Himalaya | 773 | 9  | Gehrels et al., 2008 |
| Tethys Himalaya | 778 | 10 | Gehrels et al., 2008 |
| Tethys Himalaya | 780 | 20 | Gehrels et al., 2008 |
| Tethys Himalaya | 780 | 18 | Gehrels et al., 2008 |
| Tethys Himalaya | 780 | 6  | Gehrels et al., 2008 |
| Tethys Himalaya | 785 | 24 | Gehrels et al., 2008 |
| Tethys Himalaya | 785 | 7  | Gehrels et al., 2008 |
| Tethys Himalaya | 786 | 5  | Gehrels et al., 2008 |
| Tethys Himalaya | 789 | 6  | Gehrels et al., 2008 |
| Tethys Himalaya | 789 | 7  | Gehrels et al., 2008 |
| Tethys Himalaya | 791 | 16 | Gehrels et al., 2008 |
| Tethys Himalaya | 794 | 9  | Gehrels et al., 2008 |
| Tethys Himalaya | 795 | 6  | Gehrels et al., 2008 |
| Tethys Himalaya | 796 | 18 | Gehrels et al., 2008 |
| Tethys Himalaya | 796 | 14 | Gehrels et al., 2008 |
| Tethys Himalaya | 797 | 21 | Gehrels et al., 2008 |
| Tethys Himalaya | 798 | 15 | Gehrels et al., 2008 |
| Tethys Himalaya | 799 | 5  | Gehrels et al., 2008 |
| Tethys Himalaya | 800 | 9  | Gehrels et al., 2008 |
| Tethys Himalaya | 801 | 20 | Gehrels et al., 2008 |
| Tethys Himalaya | 802 | 7  | Gehrels et al., 2008 |
| Tethys Himalaya | 803 | 13 | Gehrels et al., 2008 |
| Tethys Himalaya | 806 | 5  | Gehrels et al., 2008 |
| Tethys Himalaya | 809 | 17 | Gehrels et al., 2008 |
| Tethys Himalaya | 812 | 11 | Gehrels et al., 2008 |
| Tethys Himalaya | 812 | 4  | Gehrels et al., 2008 |
| Tethys Himalaya | 814 | 20 | Gehrels et al., 2008 |
| Tethys Himalaya | 814 | 5  | Gehrels et al., 2008 |
| Tethys Himalaya | 815 | 4  | Gehrels et al., 2008 |
| Tethys Himalaya | 816 | 10 | Gehrels et al., 2008 |
| Tethys Himalaya | 816 | 5  | Gehrels et al., 2008 |
| Tethys Himalaya | 819 | 12 | Gehrels et al., 2008 |
| Tethys Himalaya | 821 | 26 | Gehrels et al., 2008 |
| Tethys Himalaya | 821 | 11 | Gehrels et al., 2008 |
| Tethys Himalaya | 821 | 7  | Gehrels et al., 2008 |
| Tethys Himalaya | 823 | 15 | Gehrels et al., 2008 |
| Tethys Himalaya | 826 | 22 | Gehrels et al., 2008 |
| Tethys Himalaya | 827 | 13 | Gehrels et al., 2008 |
| Tethys Himalaya | 829 | 18 | Gehrels et al., 2008 |
| Tethys Himalaya | 829 | 11 | Gehrels et al., 2008 |
| Tethys Himalaya | 831 | 11 | Gehrels et al., 2008 |
| Tethys Himalaya | 832 | 10 | Gehrels et al., 2008 |
| Tethys Himalaya | 832 | 30 | Gehrels et al., 2008 |
| Tethys Himalaya | 835 | 10 | Gehrels et al., 2008 |
| Tethys Himalaya | 835 | 4  | Gehrels et al., 2008 |
| Tethys Himalaya | 836 | 30 | Gehrels et al., 2008 |
| Tethys Himalaya | 837 | 14 | Gehrels et al., 2008 |
| Tethys Himalaya | 837 | 4  | Gehrels et al., 2008 |
| Tethys Himalaya | 838 | 5  | Gehrels et al., 2008 |
| Tethys Himalaya | 839 | 9  | Gehrels et al., 2008 |
| Tethys Himalaya | 840 | 11 | Gehrels et al., 2008 |
| Tethys Himalaya | 840 | 25 | Gehrels et al., 2008 |
| Tethys Himalaya | 841 | 5  | Gehrels et al., 2008 |
| Tethys Himalaya | 842 | 11 | Gehrels et al., 2008 |
| Tethys Himalaya | 845 | 11 | Gehrels et al., 2008 |
| Tethys Himalaya | 846 | 29 | Gehrels et al., 2008 |
| Tethys Himalaya | 846 | 12 | Gehrels et al., 2008 |
| Tethys Himalaya | 846 | 8  | Gehrels et al., 2008 |
| Tethys Himalaya | 849 | 9  | Gehrels et al., 2008 |
| Tethys Himalaya | 851 | 25 | Gehrels et al., 2008 |
| Tethys Himalaya | 854 | 19 | Gehrels et al., 2008 |
| Tethys Himalaya | 854 | 43 | Gehrels et al., 2008 |
| Tethys Himalaya | 857 | 22 | Gehrels et al., 2008 |
| Tethys Himalaya | 861 | 12 | Gehrels et al., 2008 |
| Tethys Himalaya | 862 | 16 | Gehrels et al., 2008 |
| Tethys Himalaya | 862 | 8  | Gehrels et al., 2008 |
| Tethys Himalaya | 863 | 20 | Gehrels et al., 2008 |
| Tethys Himalaya | 864 | 20 | Gehrels et al., 2008 |



|                 |     |    |                      |
|-----------------|-----|----|----------------------|
| Tethys Himalaya | 866 | 41 | Gehrels et al., 2008 |
| Tethys Himalaya | 869 | 18 | Gehrels et al., 2008 |
| Tethys Himalaya | 869 | 10 | Gehrels et al., 2008 |
| Tethys Himalaya | 870 | 22 | Gehrels et al., 2008 |
| Tethys Himalaya | 872 | 21 | Gehrels et al., 2008 |
| Tethys Himalaya | 874 | 22 | Gehrels et al., 2008 |
| Tethys Himalaya | 874 | 12 | Gehrels et al., 2008 |
| Tethys Himalaya | 876 | 14 | Gehrels et al., 2008 |
| Tethys Himalaya | 877 | 21 | Gehrels et al., 2008 |
| Tethys Himalaya | 877 | 17 | Gehrels et al., 2008 |
| Tethys Himalaya | 878 | 10 | Gehrels et al., 2008 |
| Tethys Himalaya | 878 | 16 | Gehrels et al., 2008 |
| Tethys Himalaya | 879 | 25 | Gehrels et al., 2008 |
| Tethys Himalaya | 879 | 8  | Gehrels et al., 2008 |
| Tethys Himalaya | 880 | 12 | Gehrels et al., 2008 |
| Tethys Himalaya | 881 | 14 | Gehrels et al., 2008 |
| Tethys Himalaya | 882 | 12 | Gehrels et al., 2008 |
| Tethys Himalaya | 882 | 16 | Gehrels et al., 2008 |
| Tethys Himalaya | 886 | 82 | Gehrels et al., 2008 |
| Tethys Himalaya | 887 | 8  | Gehrels et al., 2008 |
| Tethys Himalaya | 889 | 58 | Gehrels et al., 2008 |
| Tethys Himalaya | 889 | 11 | Gehrels et al., 2008 |
| Tethys Himalaya | 889 | 3  | Gehrels et al., 2008 |
| Tethys Himalaya | 890 | 21 | Gehrels et al., 2008 |
| Tethys Himalaya | 890 | 22 | Gehrels et al., 2008 |
| Tethys Himalaya | 890 | 25 | Gehrels et al., 2008 |
| Tethys Himalaya | 893 | 11 | Gehrels et al., 2008 |
| Tethys Himalaya | 894 | 12 | Gehrels et al., 2008 |
| Tethys Himalaya | 894 | 6  | Gehrels et al., 2008 |
| Tethys Himalaya | 895 | 6  | Gehrels et al., 2008 |
| Tethys Himalaya | 897 | 5  | Gehrels et al., 2008 |
| Tethys Himalaya | 898 | 15 | Gehrels et al., 2008 |
| Tethys Himalaya | 900 | 21 | Gehrels et al., 2008 |
| Tethys Himalaya | 901 | 13 | Gehrels et al., 2008 |
| Tethys Himalaya | 902 | 16 | Gehrels et al., 2008 |
| Tethys Himalaya | 904 | 10 | Gehrels et al., 2008 |
| Tethys Himalaya | 905 | 22 | Gehrels et al., 2008 |
| Tethys Himalaya | 905 | 27 | Gehrels et al., 2008 |
| Tethys Himalaya | 907 | 23 | Gehrels et al., 2008 |
| Tethys Himalaya | 907 | 17 | Gehrels et al., 2008 |
| Tethys Himalaya | 908 | 33 | Gehrels et al., 2008 |
| Tethys Himalaya | 908 | 35 | Gehrels et al., 2008 |
| Tethys Himalaya | 908 | 4  | Gehrels et al., 2008 |
| Tethys Himalaya | 910 | 13 | Gehrels et al., 2008 |
| Tethys Himalaya | 914 | 7  | Gehrels et al., 2008 |
| Tethys Himalaya | 916 | 51 | Gehrels et al., 2008 |
| Tethys Himalaya | 917 | 20 | Gehrels et al., 2008 |
| Tethys Himalaya | 917 | 34 | Gehrels et al., 2008 |
| Tethys Himalaya | 917 | 6  | Gehrels et al., 2008 |
| Tethys Himalaya | 917 | 16 | Gehrels et al., 2008 |
| Tethys Himalaya | 918 | 23 | Gehrels et al., 2008 |
| Tethys Himalaya | 918 | 7  | Gehrels et al., 2008 |
| Tethys Himalaya | 918 | 7  | Gehrels et al., 2008 |
| Tethys Himalaya | 919 | 9  | Gehrels et al., 2008 |
| Tethys Himalaya | 920 | 12 | Gehrels et al., 2008 |
| Tethys Himalaya | 921 | 6  | Gehrels et al., 2008 |
| Tethys Himalaya | 921 | 6  | Gehrels et al., 2008 |
| Tethys Himalaya | 924 | 13 | Gehrels et al., 2008 |
| Tethys Himalaya | 924 | 15 | Gehrels et al., 2008 |
| Tethys Himalaya | 925 | 11 | Gehrels et al., 2008 |
| Tethys Himalaya | 929 | 28 | Gehrels et al., 2008 |
| Tethys Himalaya | 930 | 14 | Gehrels et al., 2008 |
| Tethys Himalaya | 930 | 24 | Gehrels et al., 2008 |
| Tethys Himalaya | 932 | 12 | Gehrels et al., 2008 |
| Tethys Himalaya | 932 | 4  | Gehrels et al., 2008 |
| Tethys Himalaya | 932 | 5  | Gehrels et al., 2008 |
| Tethys Himalaya | 935 | 12 | Gehrels et al., 2008 |
| Tethys Himalaya | 935 | 11 | Gehrels et al., 2008 |
| Tethys Himalaya | 935 | 9  | Gehrels et al., 2008 |
| Tethys Himalaya | 937 | 37 | Gehrels et al., 2008 |
| Tethys Himalaya | 937 | 14 | Gehrels et al., 2008 |

|                 |      |    |                      |
|-----------------|------|----|----------------------|
| Tethys Himalaya | 939  | 18 | Gehrels et al., 2008 |
| Tethys Himalaya | 939  | 8  | Gehrels et al., 2008 |
| Tethys Himalaya | 940  | 21 | Gehrels et al., 2008 |
| Tethys Himalaya | 940  | 22 | Gehrels et al., 2008 |
| Tethys Himalaya | 940  | 22 | Gehrels et al., 2008 |
| Tethys Himalaya | 943  | 21 | Gehrels et al., 2008 |
| Tethys Himalaya | 943  | 13 | Gehrels et al., 2008 |
| Tethys Himalaya | 944  | 14 | Gehrels et al., 2008 |
| Tethys Himalaya | 945  | 11 | Gehrels et al., 2008 |
| Tethys Himalaya | 947  | 8  | Gehrels et al., 2008 |
| Tethys Himalaya | 949  | 14 | Gehrels et al., 2008 |
| Tethys Himalaya | 950  | 6  | Gehrels et al., 2008 |
| Tethys Himalaya | 951  | 11 | Gehrels et al., 2008 |
| Tethys Himalaya | 952  | 12 | Gehrels et al., 2008 |
| Tethys Himalaya | 953  | 8  | Gehrels et al., 2008 |
| Tethys Himalaya | 954  | 20 | Gehrels et al., 2008 |
| Tethys Himalaya | 955  | 10 | Gehrels et al., 2008 |
| Tethys Himalaya | 956  | 8  | Gehrels et al., 2008 |
| Tethys Himalaya | 961  | 31 | Gehrels et al., 2008 |
| Tethys Himalaya | 963  | 22 | Gehrels et al., 2008 |
| Tethys Himalaya | 965  | 23 | Gehrels et al., 2008 |
| Tethys Himalaya | 965  | 21 | Gehrels et al., 2008 |
| Tethys Himalaya | 967  | 9  | Gehrels et al., 2008 |
| Tethys Himalaya | 968  | 12 | Gehrels et al., 2008 |
| Tethys Himalaya | 968  | 14 | Gehrels et al., 2008 |
| Tethys Himalaya | 969  | 19 | Gehrels et al., 2008 |
| Tethys Himalaya | 972  | 22 | Gehrels et al., 2008 |
| Tethys Himalaya | 972  | 44 | Gehrels et al., 2008 |
| Tethys Himalaya | 973  | 13 | Gehrels et al., 2008 |
| Tethys Himalaya | 975  | 17 | Gehrels et al., 2008 |
| Tethys Himalaya | 976  | 14 | Gehrels et al., 2008 |
| Tethys Himalaya | 978  | 6  | Gehrels et al., 2008 |
| Tethys Himalaya | 979  | 12 | Gehrels et al., 2008 |
| Tethys Himalaya | 983  | 22 | Gehrels et al., 2008 |
| Tethys Himalaya | 983  | 44 | Gehrels et al., 2008 |
| Tethys Himalaya | 983  | 16 | Gehrels et al., 2008 |
| Tethys Himalaya | 985  | 9  | Gehrels et al., 2008 |
| Tethys Himalaya | 985  | 16 | Gehrels et al., 2008 |
| Tethys Himalaya | 986  | 26 | Gehrels et al., 2008 |
| Tethys Himalaya | 989  | 49 | Gehrels et al., 2008 |
| Tethys Himalaya | 998  | 5  | Gehrels et al., 2008 |
| Tethys Himalaya | 1002 | 31 | Gehrels et al., 2008 |
| Tethys Himalaya | 1003 | 29 | Gehrels et al., 2008 |
| Tethys Himalaya | 1004 | 9  | Gehrels et al., 2008 |
| Tethys Himalaya | 1005 | 14 | Gehrels et al., 2008 |
| Tethys Himalaya | 1005 | 52 | Gehrels et al., 2008 |
| Tethys Himalaya | 1009 | 27 | Gehrels et al., 2008 |
| Tethys Himalaya | 1010 | 16 | Gehrels et al., 2008 |
| Tethys Himalaya | 1010 | 20 | Gehrels et al., 2008 |
| Tethys Himalaya | 1015 | 38 | Gehrels et al., 2008 |
| Tethys Himalaya | 1017 | 22 | Gehrels et al., 2008 |
| Tethys Himalaya | 1020 | 12 | Gehrels et al., 2008 |
| Tethys Himalaya | 1022 | 21 | Gehrels et al., 2008 |
| Tethys Himalaya | 1024 | 63 | Gehrels et al., 2008 |
| Tethys Himalaya | 1025 | 33 | Gehrels et al., 2008 |
| Tethys Himalaya | 1027 | 33 | Gehrels et al., 2008 |
| Tethys Himalaya | 1027 | 36 | Gehrels et al., 2008 |
| Tethys Himalaya | 1027 | 5  | Gehrels et al., 2008 |
| Tethys Himalaya | 1030 | 21 | Gehrels et al., 2008 |
| Tethys Himalaya | 1030 | 88 | Gehrels et al., 2008 |
| Tethys Himalaya | 1031 | 4  | Gehrels et al., 2008 |
| Tethys Himalaya | 1031 | 6  | Gehrels et al., 2008 |
| Tethys Himalaya | 1034 | 22 | Gehrels et al., 2008 |
| Tethys Himalaya | 1037 | 31 | Gehrels et al., 2008 |
| Tethys Himalaya | 1039 | 4  | Gehrels et al., 2008 |
| Tethys Himalaya | 1040 | 48 | Gehrels et al., 2008 |
| Tethys Himalaya | 1042 | 8  | Gehrels et al., 2008 |
| Tethys Himalaya | 1042 | 10 | Gehrels et al., 2008 |
| Tethys Himalaya | 1045 | 5  | Gehrels et al., 2008 |
| Tethys Himalaya | 1050 | 47 | Gehrels et al., 2008 |
| Tethys Himalaya | 1052 | 8  | Gehrels et al., 2008 |

|                 |      |    |                      |
|-----------------|------|----|----------------------|
| Tethys Himalaya | 1052 | 18 | Gehrels et al., 2008 |
| Tethys Himalaya | 1053 | 25 | Gehrels et al., 2008 |
| Tethys Himalaya | 1053 | 12 | Gehrels et al., 2008 |
| Tethys Himalaya | 1056 | 23 | Gehrels et al., 2008 |
| Tethys Himalaya | 1056 | 28 | Gehrels et al., 2008 |
| Tethys Himalaya | 1056 | 86 | Gehrels et al., 2008 |
| Tethys Himalaya | 1058 | 40 | Gehrels et al., 2008 |
| Tethys Himalaya | 1058 | 26 | Gehrels et al., 2008 |
| Tethys Himalaya | 1060 | 5  | Gehrels et al., 2008 |
| Tethys Himalaya | 1061 | 4  | Gehrels et al., 2008 |
| Tethys Himalaya | 1062 | 21 | Gehrels et al., 2008 |
| Tethys Himalaya | 1062 | 32 | Gehrels et al., 2008 |
| Tethys Himalaya | 1063 | 24 | Gehrels et al., 2008 |
| Tethys Himalaya | 1063 | 7  | Gehrels et al., 2008 |
| Tethys Himalaya | 1064 | 25 | Gehrels et al., 2008 |
| Tethys Himalaya | 1065 | 21 | Gehrels et al., 2008 |
| Tethys Himalaya | 1065 | 30 | Gehrels et al., 2008 |
| Tethys Himalaya | 1065 | 4  | Gehrels et al., 2008 |
| Tethys Himalaya | 1066 | 21 | Gehrels et al., 2008 |
| Tethys Himalaya | 1066 | 24 | Gehrels et al., 2008 |
| Tethys Himalaya | 1070 | 12 | Gehrels et al., 2008 |
| Tethys Himalaya | 1070 | 6  | Gehrels et al., 2008 |
| Tethys Himalaya | 1070 | 11 | Gehrels et al., 2008 |
| Tethys Himalaya | 1071 | 21 | Gehrels et al., 2008 |
| Tethys Himalaya | 1071 | 7  | Gehrels et al., 2008 |
| Tethys Himalaya | 1071 | 10 | Gehrels et al., 2008 |
| Tethys Himalaya | 1072 | 63 | Gehrels et al., 2008 |
| Tethys Himalaya | 1073 | 20 | Gehrels et al., 2008 |
| Tethys Himalaya | 1074 | 25 | Gehrels et al., 2008 |
| Tethys Himalaya | 1074 | 19 | Gehrels et al., 2008 |
| Tethys Himalaya | 1075 | 16 | Gehrels et al., 2008 |
| Tethys Himalaya | 1076 | 54 | Gehrels et al., 2008 |
| Tethys Himalaya | 1077 | 5  | Gehrels et al., 2008 |
| Tethys Himalaya | 1078 | 67 | Gehrels et al., 2008 |
| Tethys Himalaya | 1078 | 4  | Gehrels et al., 2008 |
| Tethys Himalaya | 1079 | 21 | Gehrels et al., 2008 |
| Tethys Himalaya | 1079 | 29 | Gehrels et al., 2008 |
| Tethys Himalaya | 1079 | 4  | Gehrels et al., 2008 |
| Tethys Himalaya | 1079 | 4  | Gehrels et al., 2008 |
| Tethys Himalaya | 1079 | 4  | Gehrels et al., 2008 |
| Tethys Himalaya | 1082 | 35 | Gehrels et al., 2008 |
| Tethys Himalaya | 1087 | 33 | Gehrels et al., 2008 |
| Tethys Himalaya | 1087 | 20 | Gehrels et al., 2008 |
| Tethys Himalaya | 1087 | 6  | Gehrels et al., 2008 |
| Tethys Himalaya | 1088 | 30 | Gehrels et al., 2008 |
| Tethys Himalaya | 1088 | 35 | Gehrels et al., 2008 |
| Tethys Himalaya | 1088 | 12 | Gehrels et al., 2008 |
| Tethys Himalaya | 1089 | 22 | Gehrels et al., 2008 |
| Tethys Himalaya | 1090 | 35 | Gehrels et al., 2008 |
| Tethys Himalaya | 1090 | 24 | Gehrels et al., 2008 |
| Tethys Himalaya | 1090 | 6  | Gehrels et al., 2008 |
| Tethys Himalaya | 1090 | 19 | Gehrels et al., 2008 |
| Tethys Himalaya | 1092 | 20 | Gehrels et al., 2008 |
| Tethys Himalaya | 1094 | 23 | Gehrels et al., 2008 |
| Tethys Himalaya | 1094 | 26 | Gehrels et al., 2008 |
| Tethys Himalaya | 1094 | 12 | Gehrels et al., 2008 |
| Tethys Himalaya | 1095 | 68 | Gehrels et al., 2008 |
| Tethys Himalaya | 1096 | 20 | Gehrels et al., 2008 |
| Tethys Himalaya | 1096 | 20 | Gehrels et al., 2008 |
| Tethys Himalaya | 1097 | 21 | Gehrels et al., 2008 |
| Tethys Himalaya | 1097 | 77 | Gehrels et al., 2008 |
| Tethys Himalaya | 1101 | 23 | Gehrels et al., 2008 |
| Tethys Himalaya | 1101 | 13 | Gehrels et al., 2008 |
| Tethys Himalaya | 1102 | 38 | Gehrels et al., 2008 |
| Tethys Himalaya | 1104 | 38 | Gehrels et al., 2008 |
| Tethys Himalaya | 1105 | 34 | Gehrels et al., 2008 |
| Tethys Himalaya | 1107 | 22 | Gehrels et al., 2008 |
| Tethys Himalaya | 1108 | 37 | Gehrels et al., 2008 |
| Tethys Himalaya | 1108 | 43 | Gehrels et al., 2008 |
| Tethys Himalaya | 1109 | 13 | Gehrels et al., 2008 |
| Tethys Himalaya | 1110 | 11 | Gehrels et al., 2008 |
| Tethys Himalaya | 1111 | 5  | Gehrels et al., 2008 |

|                 |      |    |                      |
|-----------------|------|----|----------------------|
| Tethys Himalaya | 1112 | 6  | Gehrels et al., 2008 |
| Tethys Himalaya | 1112 | 7  | Gehrels et al., 2008 |
| Tethys Himalaya | 1114 | 13 | Gehrels et al., 2008 |
| Tethys Himalaya | 1116 | 17 | Gehrels et al., 2008 |
| Tethys Himalaya | 1117 | 45 | Gehrels et al., 2008 |
| Tethys Himalaya | 1117 | 9  | Gehrels et al., 2008 |
| Tethys Himalaya | 1118 | 20 | Gehrels et al., 2008 |
| Tethys Himalaya | 1120 | 23 | Gehrels et al., 2008 |
| Tethys Himalaya | 1120 | 6  | Gehrels et al., 2008 |
| Tethys Himalaya | 1121 | 8  | Gehrels et al., 2008 |
| Tethys Himalaya | 1124 | 32 | Gehrels et al., 2008 |
| Tethys Himalaya | 1125 | 8  | Gehrels et al., 2008 |
| Tethys Himalaya | 1127 | 10 | Gehrels et al., 2008 |
| Tethys Himalaya | 1127 | 7  | Gehrels et al., 2008 |
| Tethys Himalaya | 1128 | 34 | Gehrels et al., 2008 |
| Tethys Himalaya | 1129 | 20 | Gehrels et al., 2008 |
| Tethys Himalaya | 1129 | 22 | Gehrels et al., 2008 |
| Tethys Himalaya | 1129 | 30 | Gehrels et al., 2008 |
| Tethys Himalaya | 1132 | 34 | Gehrels et al., 2008 |
| Tethys Himalaya | 1134 | 28 | Gehrels et al., 2008 |
| Tethys Himalaya | 1136 | 32 | Gehrels et al., 2008 |
| Tethys Himalaya | 1138 | 22 | Gehrels et al., 2008 |
| Tethys Himalaya | 1140 | 16 | Gehrels et al., 2008 |
| Tethys Himalaya | 1140 | 46 | Gehrels et al., 2008 |
| Tethys Himalaya | 1142 | 20 | Gehrels et al., 2008 |
| Tethys Himalaya | 1144 | 30 | Gehrels et al., 2008 |
| Tethys Himalaya | 1145 | 24 | Gehrels et al., 2008 |
| Tethys Himalaya | 1147 | 55 | Gehrels et al., 2008 |
| Tethys Himalaya | 1148 | 21 | Gehrels et al., 2008 |
| Tethys Himalaya | 1148 | 32 | Gehrels et al., 2008 |
| Tethys Himalaya | 1148 | 8  | Gehrels et al., 2008 |
| Tethys Himalaya | 1149 | 22 | Gehrels et al., 2008 |
| Tethys Himalaya | 1150 | 24 | Gehrels et al., 2008 |
| Tethys Himalaya | 1152 | 4  | Gehrels et al., 2008 |
| Tethys Himalaya | 1153 | 16 | Gehrels et al., 2008 |
| Tethys Himalaya | 1154 | 95 | Gehrels et al., 2008 |
| Tethys Himalaya | 1155 | 22 | Gehrels et al., 2008 |
| Tethys Himalaya | 1156 | 32 | Gehrels et al., 2008 |
| Tethys Himalaya | 1158 | 69 | Gehrels et al., 2008 |
| Tethys Himalaya | 1159 | 16 | Gehrels et al., 2008 |
| Tethys Himalaya | 1160 | 90 | Gehrels et al., 2008 |
| Tethys Himalaya | 1160 | 6  | Gehrels et al., 2008 |
| Tethys Himalaya | 1161 | 20 | Gehrels et al., 2008 |
| Tethys Himalaya | 1161 | 5  | Gehrels et al., 2008 |
| Tethys Himalaya | 1163 | 20 | Gehrels et al., 2008 |
| Tethys Himalaya | 1164 | 20 | Gehrels et al., 2008 |
| Tethys Himalaya | 1167 | 36 | Gehrels et al., 2008 |
| Tethys Himalaya | 1168 | 3  | Gehrels et al., 2008 |
| Tethys Himalaya | 1169 | 3  | Gehrels et al., 2008 |
| Tethys Himalaya | 1170 | 13 | Gehrels et al., 2008 |
| Tethys Himalaya | 1172 | 34 | Gehrels et al., 2008 |
| Tethys Himalaya | 1172 | 19 | Gehrels et al., 2008 |
| Tethys Himalaya | 1174 | 5  | Gehrels et al., 2008 |
| Tethys Himalaya | 1174 | 7  | Gehrels et al., 2008 |
| Tethys Himalaya | 1176 | 12 | Gehrels et al., 2008 |
| Tethys Himalaya | 1176 | 8  | Gehrels et al., 2008 |
| Tethys Himalaya | 1178 | 7  | Gehrels et al., 2008 |
| Tethys Himalaya | 1178 | 4  | Gehrels et al., 2008 |
| Tethys Himalaya | 1179 | 26 | Gehrels et al., 2008 |
| Tethys Himalaya | 1181 | 23 | Gehrels et al., 2008 |
| Tethys Himalaya | 1181 | 24 | Gehrels et al., 2008 |
| Tethys Himalaya | 1182 | 6  | Gehrels et al., 2008 |
| Tethys Himalaya | 1184 | 14 | Gehrels et al., 2008 |
| Tethys Himalaya | 1185 | 10 | Gehrels et al., 2008 |
| Tethys Himalaya | 1186 | 40 | Gehrels et al., 2008 |
| Tethys Himalaya | 1188 | 51 | Gehrels et al., 2008 |
| Tethys Himalaya | 1188 | 26 | Gehrels et al., 2008 |
| Tethys Himalaya | 1189 | 33 | Gehrels et al., 2008 |
| Tethys Himalaya | 1190 | 21 | Gehrels et al., 2008 |
| Tethys Himalaya | 1194 | 20 | Gehrels et al., 2008 |
| Tethys Himalaya | 1194 | 24 | Gehrels et al., 2008 |

|                 |      |    |                      |
|-----------------|------|----|----------------------|
| Tethys Himalaya | 1196 | 32 | Gehrels et al., 2008 |
| Tethys Himalaya | 1197 | 32 | Gehrels et al., 2008 |
| Tethys Himalaya | 1198 | 18 | Gehrels et al., 2008 |
| Tethys Himalaya | 1200 | 30 | Gehrels et al., 2008 |
| Tethys Himalaya | 1200 | 6  | Gehrels et al., 2008 |
| Tethys Himalaya | 1203 | 7  | Gehrels et al., 2008 |
| Tethys Himalaya | 1203 | 7  | Gehrels et al., 2008 |
| Tethys Himalaya | 1204 | 23 | Gehrels et al., 2008 |
| Tethys Himalaya | 1205 | 27 | Gehrels et al., 2008 |
| Tethys Himalaya | 1205 | 39 | Gehrels et al., 2008 |
| Tethys Himalaya | 1205 | 8  | Gehrels et al., 2008 |
| Tethys Himalaya | 1208 | 34 | Gehrels et al., 2008 |
| Tethys Himalaya | 1209 | 20 | Gehrels et al., 2008 |
| Tethys Himalaya | 1213 | 34 | Gehrels et al., 2008 |
| Tethys Himalaya | 1213 | 28 | Gehrels et al., 2008 |
| Tethys Himalaya | 1214 | 5  | Gehrels et al., 2008 |
| Tethys Himalaya | 1215 | 7  | Gehrels et al., 2008 |
| Tethys Himalaya | 1216 | 36 | Gehrels et al., 2008 |
| Tethys Himalaya | 1217 | 21 | Gehrels et al., 2008 |
| Tethys Himalaya | 1219 | 29 | Gehrels et al., 2008 |
| Tethys Himalaya | 1223 | 19 | Gehrels et al., 2008 |
| Tethys Himalaya | 1223 | 3  | Gehrels et al., 2008 |
| Tethys Himalaya | 1224 | 31 | Gehrels et al., 2008 |
| Tethys Himalaya | 1225 | 20 | Gehrels et al., 2008 |
| Tethys Himalaya | 1225 | 41 | Gehrels et al., 2008 |
| Tethys Himalaya | 1225 | 26 | Gehrels et al., 2008 |
| Tethys Himalaya | 1225 | 20 | Gehrels et al., 2008 |
| Tethys Himalaya | 1226 | 20 | Gehrels et al., 2008 |
| Tethys Himalaya | 1227 | 59 | Gehrels et al., 2008 |
| Tethys Himalaya | 1228 | 24 | Gehrels et al., 2008 |
| Tethys Himalaya | 1229 | 32 | Gehrels et al., 2008 |
| Tethys Himalaya | 1231 | 33 | Gehrels et al., 2008 |
| Tethys Himalaya | 1234 | 33 | Gehrels et al., 2008 |
| Tethys Himalaya | 1234 | 19 | Gehrels et al., 2008 |
| Tethys Himalaya | 1235 | 8  | Gehrels et al., 2008 |
| Tethys Himalaya | 1236 | 30 | Gehrels et al., 2008 |
| Tethys Himalaya | 1236 | 34 | Gehrels et al., 2008 |
| Tethys Himalaya | 1237 | 20 | Gehrels et al., 2008 |
| Tethys Himalaya | 1239 | 20 | Gehrels et al., 2008 |
| Tethys Himalaya | 1239 | 90 | Gehrels et al., 2008 |
| Tethys Himalaya | 1240 | 29 | Gehrels et al., 2008 |
| Tethys Himalaya | 1246 | 21 | Gehrels et al., 2008 |
| Tethys Himalaya | 1246 | 25 | Gehrels et al., 2008 |
| Tethys Himalaya | 1246 | 8  | Gehrels et al., 2008 |
| Tethys Himalaya | 1247 | 28 | Gehrels et al., 2008 |
| Tethys Himalaya | 1247 | 23 | Gehrels et al., 2008 |
| Tethys Himalaya | 1251 | 10 | Gehrels et al., 2008 |
| Tethys Himalaya | 1256 | 7  | Gehrels et al., 2008 |
| Tethys Himalaya | 1257 | 20 | Gehrels et al., 2008 |
| Tethys Himalaya | 1259 | 17 | Gehrels et al., 2008 |
| Tethys Himalaya | 1265 | 20 | Gehrels et al., 2008 |
| Tethys Himalaya | 1267 | 20 | Gehrels et al., 2008 |
| Tethys Himalaya | 1267 | 32 | Gehrels et al., 2008 |
| Tethys Himalaya | 1272 | 16 | Gehrels et al., 2008 |
| Tethys Himalaya | 1274 | 20 | Gehrels et al., 2008 |
| Tethys Himalaya | 1274 | 22 | Gehrels et al., 2008 |
| Tethys Himalaya | 1274 | 16 | Gehrels et al., 2008 |
| Tethys Himalaya | 1275 | 27 | Gehrels et al., 2008 |
| Tethys Himalaya | 1285 | 11 | Gehrels et al., 2008 |
| Tethys Himalaya | 1287 | 8  | Gehrels et al., 2008 |
| Tethys Himalaya | 1288 | 12 | Gehrels et al., 2008 |
| Tethys Himalaya | 1291 | 12 | Gehrels et al., 2008 |
| Tethys Himalaya | 1295 | 10 | Gehrels et al., 2008 |
| Tethys Himalaya | 1297 | 6  | Gehrels et al., 2008 |
| Tethys Himalaya | 1305 | 32 | Gehrels et al., 2008 |
| Tethys Himalaya | 1312 | 23 | Gehrels et al., 2008 |
| Tethys Himalaya | 1312 | 27 | Gehrels et al., 2008 |
| Tethys Himalaya | 1319 | 21 | Gehrels et al., 2008 |
| Tethys Himalaya | 1320 | 38 | Gehrels et al., 2008 |
| Tethys Himalaya | 1322 | 34 | Gehrels et al., 2008 |
| Tethys Himalaya | 1325 | 26 | Gehrels et al., 2008 |

|                 |      |    |                      |
|-----------------|------|----|----------------------|
| Tethys Himalaya | 1327 | 9  | Gehrels et al., 2008 |
| Tethys Himalaya | 1330 | 35 | Gehrels et al., 2008 |
| Tethys Himalaya | 1332 | 19 | Gehrels et al., 2008 |
| Tethys Himalaya | 1332 | 21 | Gehrels et al., 2008 |
| Tethys Himalaya | 1333 | 16 | Gehrels et al., 2008 |
| Tethys Himalaya | 1335 | 20 | Gehrels et al., 2008 |
| Tethys Himalaya | 1338 | 26 | Gehrels et al., 2008 |
| Tethys Himalaya | 1341 | 33 | Gehrels et al., 2008 |
| Tethys Himalaya | 1346 | 12 | Gehrels et al., 2008 |
| Tethys Himalaya | 1349 | 29 | Gehrels et al., 2008 |
| Tethys Himalaya | 1352 | 5  | Gehrels et al., 2008 |
| Tethys Himalaya | 1356 | 25 | Gehrels et al., 2008 |
| Tethys Himalaya | 1360 | 35 | Gehrels et al., 2008 |
| Tethys Himalaya | 1364 | 19 | Gehrels et al., 2008 |
| Tethys Himalaya | 1365 | 18 | Gehrels et al., 2008 |
| Tethys Himalaya | 1368 | 17 | Gehrels et al., 2008 |
| Tethys Himalaya | 1370 | 20 | Gehrels et al., 2008 |
| Tethys Himalaya | 1372 | 21 | Gehrels et al., 2008 |
| Tethys Himalaya | 1376 | 8  | Gehrels et al., 2008 |
| Tethys Himalaya | 1376 | 20 | Gehrels et al., 2008 |
| Tethys Himalaya | 1380 | 22 | Gehrels et al., 2008 |
| Tethys Himalaya | 1381 | 20 | Gehrels et al., 2008 |
| Tethys Himalaya | 1388 | 19 | Gehrels et al., 2008 |
| Tethys Himalaya | 1390 | 21 | Gehrels et al., 2008 |
| Tethys Himalaya | 1392 | 26 | Gehrels et al., 2008 |
| Tethys Himalaya | 1398 | 20 | Gehrels et al., 2008 |
| Tethys Himalaya | 1400 | 12 | Gehrels et al., 2008 |
| Tethys Himalaya | 1418 | 19 | Gehrels et al., 2008 |
| Tethys Himalaya | 1423 | 12 | Gehrels et al., 2008 |
| Tethys Himalaya | 1433 | 25 | Gehrels et al., 2008 |
| Tethys Himalaya | 1439 | 6  | Gehrels et al., 2008 |
| Tethys Himalaya | 1445 | 62 | Gehrels et al., 2008 |
| Tethys Himalaya | 1447 | 8  | Gehrels et al., 2008 |
| Tethys Himalaya | 1454 | 19 | Gehrels et al., 2008 |
| Tethys Himalaya | 1459 | 14 | Gehrels et al., 2008 |
| Tethys Himalaya | 1474 | 5  | Gehrels et al., 2008 |
| Tethys Himalaya | 1490 | 19 | Gehrels et al., 2008 |
| Tethys Himalaya | 1496 | 20 | Gehrels et al., 2008 |
| Tethys Himalaya | 1515 | 19 | Gehrels et al., 2008 |
| Tethys Himalaya | 1519 | 37 | Gehrels et al., 2008 |
| Tethys Himalaya | 1521 | 19 | Gehrels et al., 2008 |
| Tethys Himalaya | 1534 | 20 | Gehrels et al., 2008 |
| Tethys Himalaya | 1537 | 23 | Gehrels et al., 2008 |
| Tethys Himalaya | 1539 | 27 | Gehrels et al., 2008 |
| Tethys Himalaya | 1553 | 6  | Gehrels et al., 2008 |
| Tethys Himalaya | 1562 | 5  | Gehrels et al., 2008 |
| Tethys Himalaya | 1581 | 12 | Gehrels et al., 2008 |
| Tethys Himalaya | 1591 | 3  | Gehrels et al., 2008 |
| Tethys Himalaya | 1593 | 4  | Gehrels et al., 2008 |
| Tethys Himalaya | 1611 | 5  | Gehrels et al., 2008 |
| Tethys Himalaya | 1612 | 6  | Gehrels et al., 2008 |
| Tethys Himalaya | 1615 | 29 | Gehrels et al., 2008 |
| Tethys Himalaya | 1618 | 11 | Gehrels et al., 2008 |
| Tethys Himalaya | 1628 | 19 | Gehrels et al., 2008 |
| Tethys Himalaya | 1628 | 19 | Gehrels et al., 2008 |
| Tethys Himalaya | 1629 | 23 | Gehrels et al., 2008 |
| Tethys Himalaya | 1631 | 7  | Gehrels et al., 2008 |
| Tethys Himalaya | 1636 | 48 | Gehrels et al., 2008 |
| Tethys Himalaya | 1638 | 19 | Gehrels et al., 2008 |
| Tethys Himalaya | 1644 | 4  | Gehrels et al., 2008 |
| Tethys Himalaya | 1646 | 21 | Gehrels et al., 2008 |
| Tethys Himalaya | 1664 | 12 | Gehrels et al., 2008 |
| Tethys Himalaya | 1671 | 3  | Gehrels et al., 2008 |
| Tethys Himalaya | 1672 | 6  | Gehrels et al., 2008 |
| Tethys Himalaya | 1681 | 58 | Gehrels et al., 2008 |
| Tethys Himalaya | 1685 | 47 | Gehrels et al., 2008 |
| Tethys Himalaya | 1693 | 4  | Gehrels et al., 2008 |
| Tethys Himalaya | 1700 | 10 | Gehrels et al., 2008 |
| Tethys Himalaya | 1706 | 12 | Gehrels et al., 2008 |
| Tethys Himalaya | 1708 | 5  | Gehrels et al., 2008 |
| Tethys Himalaya | 1714 | 5  | Gehrels et al., 2008 |

|                 |      |    |                      |
|-----------------|------|----|----------------------|
| Tethys Himalaya | 1720 | 19 | Gehrels et al., 2008 |
| Tethys Himalaya | 1723 | 6  | Gehrels et al., 2008 |
| Tethys Himalaya | 1730 | 27 | Gehrels et al., 2008 |
| Tethys Himalaya | 1731 | 23 | Gehrels et al., 2008 |
| Tethys Himalaya | 1731 | 7  | Gehrels et al., 2008 |
| Tethys Himalaya | 1732 | 18 | Gehrels et al., 2008 |
| Tethys Himalaya | 1734 | 22 | Gehrels et al., 2008 |
| Tethys Himalaya | 1734 | 20 | Gehrels et al., 2008 |
| Tethys Himalaya | 1735 | 19 | Gehrels et al., 2008 |
| Tethys Himalaya | 1735 | 20 | Gehrels et al., 2008 |
| Tethys Himalaya | 1735 | 26 | Gehrels et al., 2008 |
| Tethys Himalaya | 1743 | 27 | Gehrels et al., 2008 |
| Tethys Himalaya | 1744 | 18 | Gehrels et al., 2008 |
| Tethys Himalaya | 1748 | 27 | Gehrels et al., 2008 |
| Tethys Himalaya | 1751 | 11 | Gehrels et al., 2008 |
| Tethys Himalaya | 1756 | 10 | Gehrels et al., 2008 |
| Tethys Himalaya | 1757 | 24 | Gehrels et al., 2008 |
| Tethys Himalaya | 1757 | 4  | Gehrels et al., 2008 |
| Tethys Himalaya | 1762 | 32 | Gehrels et al., 2008 |
| Tethys Himalaya | 1763 | 41 | Gehrels et al., 2008 |
| Tethys Himalaya | 1768 | 19 | Gehrels et al., 2008 |
| Tethys Himalaya | 1771 | 18 | Gehrels et al., 2008 |
| Tethys Himalaya | 1771 | 18 | Gehrels et al., 2008 |
| Tethys Himalaya | 1775 | 8  | Gehrels et al., 2008 |
| Tethys Himalaya | 1776 | 9  | Gehrels et al., 2008 |
| Tethys Himalaya | 1783 | 20 | Gehrels et al., 2008 |
| Tethys Himalaya | 1783 | 8  | Gehrels et al., 2008 |
| Tethys Himalaya | 1784 | 21 | Gehrels et al., 2008 |
| Tethys Himalaya | 1785 | 28 | Gehrels et al., 2008 |
| Tethys Himalaya | 1787 | 5  | Gehrels et al., 2008 |
| Tethys Himalaya | 1791 | 28 | Gehrels et al., 2008 |
| Tethys Himalaya | 1796 | 23 | Gehrels et al., 2008 |
| Tethys Himalaya | 1798 | 6  | Gehrels et al., 2008 |
| Tethys Himalaya | 1800 | 31 | Gehrels et al., 2008 |
| Tethys Himalaya | 1800 | 19 | Gehrels et al., 2008 |
| Tethys Himalaya | 1801 | 25 | Gehrels et al., 2008 |
| Tethys Himalaya | 1802 | 39 | Gehrels et al., 2008 |
| Tethys Himalaya | 1813 | 27 | Gehrels et al., 2008 |
| Tethys Himalaya | 1824 | 8  | Gehrels et al., 2008 |
| Tethys Himalaya | 1835 | 16 | Gehrels et al., 2008 |
| Tethys Himalaya | 1850 | 30 | Gehrels et al., 2008 |
| Tethys Himalaya | 1862 | 33 | Gehrels et al., 2008 |
| Tethys Himalaya | 1862 | 4  | Gehrels et al., 2008 |
| Tethys Himalaya | 1867 | 19 | Gehrels et al., 2008 |
| Tethys Himalaya | 1878 | 9  | Gehrels et al., 2008 |
| Tethys Himalaya | 1895 | 15 | Gehrels et al., 2008 |
| Tethys Himalaya | 1908 | 30 | Gehrels et al., 2008 |
| Tethys Himalaya | 1912 | 19 | Gehrels et al., 2008 |
| Tethys Himalaya | 1913 | 26 | Gehrels et al., 2008 |
| Tethys Himalaya | 1919 | 35 | Gehrels et al., 2008 |
| Tethys Himalaya | 1920 | 5  | Gehrels et al., 2008 |
| Tethys Himalaya | 1948 | 4  | Gehrels et al., 2008 |
| Tethys Himalaya | 1963 | 18 | Gehrels et al., 2008 |
| Tethys Himalaya | 1964 | 27 | Gehrels et al., 2008 |
| Tethys Himalaya | 1969 | 18 | Gehrels et al., 2008 |
| Tethys Himalaya | 1980 | 14 | Gehrels et al., 2008 |
| Tethys Himalaya | 1981 | 6  | Gehrels et al., 2008 |
| Tethys Himalaya | 2005 | 42 | Gehrels et al., 2008 |
| Tethys Himalaya | 2006 | 32 | Gehrels et al., 2008 |
| Tethys Himalaya | 2013 | 9  | Gehrels et al., 2008 |
| Tethys Himalaya | 2019 | 9  | Gehrels et al., 2008 |
| Tethys Himalaya | 2082 | 28 | Gehrels et al., 2008 |
| Tethys Himalaya | 2084 | 18 | Gehrels et al., 2008 |
| Tethys Himalaya | 2093 | 20 | Gehrels et al., 2008 |
| Tethys Himalaya | 2096 | 39 | Gehrels et al., 2008 |
| Tethys Himalaya | 2104 | 9  | Gehrels et al., 2008 |
| Tethys Himalaya | 2105 | 18 | Gehrels et al., 2008 |
| Tethys Himalaya | 2116 | 22 | Gehrels et al., 2008 |
| Tethys Himalaya | 2134 | 5  | Gehrels et al., 2008 |
| Tethys Himalaya | 2141 | 6  | Gehrels et al., 2008 |
| Tethys Himalaya | 2171 | 18 | Gehrels et al., 2008 |

|                 |      |    |                      |
|-----------------|------|----|----------------------|
| Tethys Himalaya | 2217 | 3  | Gehrels et al., 2008 |
| Tethys Himalaya | 2226 | 10 | Gehrels et al., 2008 |
| Tethys Himalaya | 2252 | 5  | Gehrels et al., 2008 |
| Tethys Himalaya | 2270 | 18 | Gehrels et al., 2008 |
| Tethys Himalaya | 2299 | 26 | Gehrels et al., 2008 |
| Tethys Himalaya | 2333 | 26 | Gehrels et al., 2008 |
| Tethys Himalaya | 2345 | 18 | Gehrels et al., 2008 |
| Tethys Himalaya | 2362 | 19 | Gehrels et al., 2008 |
| Tethys Himalaya | 2377 | 12 | Gehrels et al., 2008 |
| Tethys Himalaya | 2390 | 4  | Gehrels et al., 2008 |
| Tethys Himalaya | 2410 | 53 | Gehrels et al., 2008 |
| Tethys Himalaya | 2413 | 24 | Gehrels et al., 2008 |
| Tethys Himalaya | 2420 | 19 | Gehrels et al., 2008 |
| Tethys Himalaya | 2429 | 12 | Gehrels et al., 2008 |
| Tethys Himalaya | 2453 | 17 | Gehrels et al., 2008 |
| Tethys Himalaya | 2454 | 17 | Gehrels et al., 2008 |
| Tethys Himalaya | 2454 | 5  | Gehrels et al., 2008 |
| Tethys Himalaya | 2457 | 24 | Gehrels et al., 2008 |
| Tethys Himalaya | 2458 | 19 | Gehrels et al., 2008 |
| Tethys Himalaya | 2461 | 17 | Gehrels et al., 2008 |
| Tethys Himalaya | 2462 | 3  | Gehrels et al., 2008 |
| Tethys Himalaya | 2463 | 29 | Gehrels et al., 2008 |
| Tethys Himalaya | 2465 | 8  | Gehrels et al., 2008 |
| Tethys Himalaya | 2466 | 18 | Gehrels et al., 2008 |
| Tethys Himalaya | 2466 | 23 | Gehrels et al., 2008 |
| Tethys Himalaya | 2467 | 17 | Gehrels et al., 2008 |
| Tethys Himalaya | 2470 | 23 | Gehrels et al., 2008 |
| Tethys Himalaya | 2476 | 21 | Gehrels et al., 2008 |
| Tethys Himalaya | 2477 | 17 | Gehrels et al., 2008 |
| Tethys Himalaya | 2477 | 44 | Gehrels et al., 2008 |
| Tethys Himalaya | 2478 | 14 | Gehrels et al., 2008 |
| Tethys Himalaya | 2479 | 18 | Gehrels et al., 2008 |
| Tethys Himalaya | 2480 | 17 | Gehrels et al., 2008 |
| Tethys Himalaya | 2481 | 4  | Gehrels et al., 2008 |
| Tethys Himalaya | 2484 | 17 | Gehrels et al., 2008 |
| Tethys Himalaya | 2487 | 17 | Gehrels et al., 2008 |
| Tethys Himalaya | 2491 | 29 | Gehrels et al., 2008 |
| Tethys Himalaya | 2497 | 17 | Gehrels et al., 2008 |
| Tethys Himalaya | 2499 | 27 | Gehrels et al., 2008 |
| Tethys Himalaya | 2501 | 17 | Gehrels et al., 2008 |
| Tethys Himalaya | 2502 | 18 | Gehrels et al., 2008 |
| Tethys Himalaya | 2503 | 6  | Gehrels et al., 2008 |
| Tethys Himalaya | 2504 | 20 | Gehrels et al., 2008 |
| Tethys Himalaya | 2506 | 17 | Gehrels et al., 2008 |
| Tethys Himalaya | 2506 | 7  | Gehrels et al., 2008 |
| Tethys Himalaya | 2507 | 17 | Gehrels et al., 2008 |
| Tethys Himalaya | 2508 | 30 | Gehrels et al., 2008 |
| Tethys Himalaya | 2509 | 17 | Gehrels et al., 2008 |
| Tethys Himalaya | 2510 | 5  | Gehrels et al., 2008 |
| Tethys Himalaya | 2511 | 23 | Gehrels et al., 2008 |
| Tethys Himalaya | 2511 | 5  | Gehrels et al., 2008 |
| Tethys Himalaya | 2511 | 8  | Gehrels et al., 2008 |
| Tethys Himalaya | 2512 | 17 | Gehrels et al., 2008 |
| Tethys Himalaya | 2513 | 6  | Gehrels et al., 2008 |
| Tethys Himalaya | 2515 | 11 | Gehrels et al., 2008 |
| Tethys Himalaya | 2517 | 17 | Gehrels et al., 2008 |
| Tethys Himalaya | 2519 | 5  | Gehrels et al., 2008 |
| Tethys Himalaya | 2520 | 17 | Gehrels et al., 2008 |
| Tethys Himalaya | 2522 | 18 | Gehrels et al., 2008 |
| Tethys Himalaya | 2522 | 4  | Gehrels et al., 2008 |
| Tethys Himalaya | 2523 | 17 | Gehrels et al., 2008 |
| Tethys Himalaya | 2530 | 18 | Gehrels et al., 2008 |
| Tethys Himalaya | 2534 | 23 | Gehrels et al., 2008 |
| Tethys Himalaya | 2534 | 17 | Gehrels et al., 2008 |
| Tethys Himalaya | 2535 | 3  | Gehrels et al., 2008 |
| Tethys Himalaya | 2543 | 17 | Gehrels et al., 2008 |
| Tethys Himalaya | 2543 | 5  | Gehrels et al., 2008 |
| Tethys Himalaya | 2544 | 17 | Gehrels et al., 2008 |
| Tethys Himalaya | 2545 | 24 | Gehrels et al., 2008 |
| Tethys Himalaya | 2558 | 4  | Gehrels et al., 2008 |
| Tethys Himalaya | 2562 | 5  | Gehrels et al., 2008 |



|                 |      |    |                      |
|-----------------|------|----|----------------------|
| Tethys Himalaya | 2563 | 6  | Gehrels et al., 2008 |
| Tethys Himalaya | 2569 | 8  | Gehrels et al., 2008 |
| Tethys Himalaya | 2570 | 3  | Gehrels et al., 2008 |
| Tethys Himalaya | 2570 | 5  | Gehrels et al., 2008 |
| Tethys Himalaya | 2572 | 30 | Gehrels et al., 2008 |
| Tethys Himalaya | 2572 | 5  | Gehrels et al., 2008 |
| Tethys Himalaya | 2574 | 5  | Gehrels et al., 2008 |
| Tethys Himalaya | 2574 | 2  | Gehrels et al., 2008 |
| Tethys Himalaya | 2575 | 6  | Gehrels et al., 2008 |
| Tethys Himalaya | 2576 | 6  | Gehrels et al., 2008 |
| Tethys Himalaya | 2582 | 6  | Gehrels et al., 2008 |
| Tethys Himalaya | 2585 | 8  | Gehrels et al., 2008 |
| Tethys Himalaya | 2587 | 8  | Gehrels et al., 2008 |
| Tethys Himalaya | 2587 | 5  | Gehrels et al., 2008 |
| Tethys Himalaya | 2588 | 5  | Gehrels et al., 2008 |
| Tethys Himalaya | 2592 | 4  | Gehrels et al., 2008 |
| Tethys Himalaya | 2593 | 5  | Gehrels et al., 2008 |
| Tethys Himalaya | 2596 | 4  | Gehrels et al., 2008 |
| Tethys Himalaya | 2597 | 17 | Gehrels et al., 2008 |
| Tethys Himalaya | 2597 | 4  | Gehrels et al., 2008 |
| Tethys Himalaya | 2599 | 6  | Gehrels et al., 2008 |
| Tethys Himalaya | 2601 | 24 | Gehrels et al., 2008 |
| Tethys Himalaya | 2601 | 5  | Gehrels et al., 2008 |
| Tethys Himalaya | 2606 | 30 | Gehrels et al., 2008 |
| Tethys Himalaya | 2606 | 27 | Gehrels et al., 2008 |
| Tethys Himalaya | 2607 | 7  | Gehrels et al., 2008 |
| Tethys Himalaya | 2607 | 14 | Gehrels et al., 2008 |
| Tethys Himalaya | 2607 | 5  | Gehrels et al., 2008 |
| Tethys Himalaya | 2615 | 5  | Gehrels et al., 2008 |
| Tethys Himalaya | 2625 | 8  | Gehrels et al., 2008 |
| Tethys Himalaya | 2625 | 22 | Gehrels et al., 2008 |
| Tethys Himalaya | 2626 | 17 | Gehrels et al., 2008 |
| Tethys Himalaya | 2627 | 6  | Gehrels et al., 2008 |
| Tethys Himalaya | 2632 | 29 | Gehrels et al., 2008 |
| Tethys Himalaya | 2632 | 5  | Gehrels et al., 2008 |
| Tethys Himalaya | 2632 | 3  | Gehrels et al., 2008 |
| Tethys Himalaya | 2641 | 24 | Gehrels et al., 2008 |
| Tethys Himalaya | 2644 | 7  | Gehrels et al., 2008 |
| Tethys Himalaya | 2648 | 62 | Gehrels et al., 2008 |
| Tethys Himalaya | 2649 | 3  | Gehrels et al., 2008 |
| Tethys Himalaya | 2652 | 17 | Gehrels et al., 2008 |
| Tethys Himalaya | 2653 | 7  | Gehrels et al., 2008 |
| Tethys Himalaya | 2654 | 24 | Gehrels et al., 2008 |
| Tethys Himalaya | 2654 | 14 | Gehrels et al., 2008 |
| Tethys Himalaya | 2655 | 29 | Gehrels et al., 2008 |
| Tethys Himalaya | 2655 | 5  | Gehrels et al., 2008 |
| Tethys Himalaya | 2659 | 25 | Gehrels et al., 2008 |
| Tethys Himalaya | 2668 | 6  | Gehrels et al., 2008 |
| Tethys Himalaya | 2668 | 6  | Gehrels et al., 2008 |
| Tethys Himalaya | 2680 | 17 | Gehrels et al., 2008 |
| Tethys Himalaya | 2681 | 5  | Gehrels et al., 2008 |
| Tethys Himalaya | 2685 | 4  | Gehrels et al., 2008 |
| Tethys Himalaya | 2686 | 6  | Gehrels et al., 2008 |
| Tethys Himalaya | 2687 | 27 | Gehrels et al., 2008 |
| Tethys Himalaya | 2687 | 8  | Gehrels et al., 2008 |
| Tethys Himalaya | 2696 | 5  | Gehrels et al., 2008 |
| Tethys Himalaya | 2698 | 6  | Gehrels et al., 2008 |
| Tethys Himalaya | 2699 | 19 | Gehrels et al., 2008 |
| Tethys Himalaya | 2703 | 1  | Gehrels et al., 2008 |
| Tethys Himalaya | 2706 | 7  | Gehrels et al., 2008 |
| Tethys Himalaya | 2710 | 17 | Gehrels et al., 2008 |
| Tethys Himalaya | 2725 | 16 | Gehrels et al., 2008 |
| Tethys Himalaya | 2731 | 6  | Gehrels et al., 2008 |
| Tethys Himalaya | 2737 | 17 | Gehrels et al., 2008 |
| Tethys Himalaya | 2741 | 5  | Gehrels et al., 2008 |
| Tethys Himalaya | 2746 | 5  | Gehrels et al., 2008 |
| Tethys Himalaya | 2760 | 6  | Gehrels et al., 2008 |
| Tethys Himalaya | 2760 | 5  | Gehrels et al., 2008 |
| Tethys Himalaya | 2769 | 9  | Gehrels et al., 2008 |
| Tethys Himalaya | 2772 | 6  | Gehrels et al., 2008 |
| Tethys Himalaya | 2790 | 6  | Gehrels et al., 2008 |

|                 |      |    |                      |
|-----------------|------|----|----------------------|
| Tethys Himalaya | 2801 | 18 | Gehrels et al., 2008 |
| Tethys Himalaya | 2805 | 23 | Gehrels et al., 2008 |
| Tethys Himalaya | 2812 | 6  | Gehrels et al., 2008 |
| Tethys Himalaya | 2828 | 37 | Gehrels et al., 2008 |
| Tethys Himalaya | 2830 | 16 | Gehrels et al., 2008 |
| Tethys Himalaya | 2836 | 17 | Gehrels et al., 2008 |
| Tethys Himalaya | 2839 | 28 | Gehrels et al., 2008 |
| Tethys Himalaya | 2841 | 16 | Gehrels et al., 2008 |
| Tethys Himalaya | 2842 | 3  | Gehrels et al., 2008 |
| Tethys Himalaya | 2843 | 18 | Gehrels et al., 2008 |
| Tethys Himalaya | 2853 | 11 | Gehrels et al., 2008 |
| Tethys Himalaya | 2860 | 16 | Gehrels et al., 2008 |
| Tethys Himalaya | 2875 | 5  | Gehrels et al., 2008 |
| Tethys Himalaya | 2877 | 16 | Gehrels et al., 2008 |
| Tethys Himalaya | 2889 | 22 | Gehrels et al., 2008 |
| Tethys Himalaya | 2916 | 5  | Gehrels et al., 2008 |
| Tethys Himalaya | 2944 | 5  | Gehrels et al., 2008 |
| Tethys Himalaya | 2953 | 16 | Gehrels et al., 2008 |
| Tethys Himalaya | 2955 | 16 | Gehrels et al., 2008 |
| Tethys Himalaya | 2970 | 5  | Gehrels et al., 2008 |
| Tethys Himalaya | 3043 | 29 | Gehrels et al., 2008 |
| Tethys Himalaya | 3083 | 16 | Gehrels et al., 2008 |
| Tethys Himalaya | 3103 | 19 | Gehrels et al., 2008 |
| Tethys Himalaya | 3119 | 16 | Gehrels et al., 2008 |
| Tethys Himalaya | 3137 | 16 | Gehrels et al., 2008 |
| Tethys Himalaya | 3145 | 3  | Gehrels et al., 2008 |
| Tethys Himalaya | 3156 | 16 | Gehrels et al., 2008 |
| Tethys Himalaya | 3257 | 30 | Gehrels et al., 2008 |
| Tethys Himalaya | 3264 | 33 | Gehrels et al., 2008 |
| Tethys Himalaya | 3280 | 4  | Gehrels et al., 2008 |
| Tethys Himalaya | 3291 | 23 | Gehrels et al., 2008 |
| Tethys Himalaya | 3310 | 7  | Gehrels et al., 2008 |
| Tethys Himalaya | 3311 | 16 | Gehrels et al., 2008 |
| Tethys Himalaya | 3318 | 43 | Gehrels et al., 2008 |
| Tethys Himalaya | 3320 | 4  | Gehrels et al., 2008 |
| Tethys Himalaya | 3372 | 6  | Gehrels et al., 2008 |
| Tethys Himalaya | 3446 | 19 | Gehrels et al., 2008 |
| Tethys Himalaya | 3452 | 18 | Gehrels et al., 2008 |
| Tethys Himalaya | 3457 | 16 | Gehrels et al., 2008 |
| Tethys Himalaya | 3533 | 2  | Gehrels et al., 2008 |
| Tethys Himalaya | 3538 | 16 | Gehrels et al., 2008 |
| Tethys Himalaya | 3755 | 5  | Gehrels et al., 2008 |
| Tethys Himalaya | 3785 | 15 | Gehrels et al., 2008 |
| Tethys Himalaya | 4042 | 6  | Gehrels et al., 2008 |
| Tethys Himalaya | 4082 | 6  | Gehrels et al., 2008 |

---

- 
- Chu, M.-F., Chung, S.-L., Song, B., Liu, D., O'Reilly, S. Y., Pearson, N. J., Ji, J., and Wen, D.-J., 2006, Zircon U-Pb and Hf isotope constraints on the Mesozoic tectonics and crustal evolution of southern Tibet: *Geology*, v. 34, no. 9, p. 745-748, doi: 10.1130/G22725.1.
- Gehrels, G. E., Valencia, V. A., and Ruiz, J., 2008, Enhanced precision, accuracy, efficiency, and spatial resolution of U-Pb ages by laser ablation-multicollector-inductively coupled plasma-mass spectrometry: *Geochemistry, Geophysics, Geosystems*, v. 9, no. 3, doi: 10.1029/2007GC001805.
- Ji, W.-Q., Wu, F.-Y., Chung, S.-L., Li, J.-X., and Liu, C.-Z., 2009, Zircon U-Pb geochronology and Hf isotopic constraints on petrogenesis of the Gangdese batholith, southern Tibet: *Chemical Geology*, v. 262, no. 3, p. 229-245, doi: 10.1016/j.chemgeo.2009.01.020.
- Lee, H., Chung, S., Wang, Y., Zhu, D., Yan, J., Song, B., and Liu, D., 2007, Age, Petrogenesis and Geological Significance of the Linzizong Volcanic Successions in the Linzhou Basin, Southern Tibet: Evidence from Zircon U-Pb Dates and Hf Isotopes, Volume 23, *Acta Petrologica Sinica*, p. 493-500.
- Zhang, R., Xu, W., Guo, J., Zong, K., Cai, H., and Yuan, H., 2007, Zircon U-Pb and Hf isotopic composition of deformed granite in the southern margin of the Gangdese belt, Tibet: Evidence for Early Jurassic subduction of Neo-Tethyan oceanic slab: *Acta Petrologica Sinica*, v. 23, no. 6, p. 1347-1353, doi: 10.1016/j.chemgeo.2009.09.008.
- Zhu, D.-C., Mo, X.-X., Niu, Y., Zhao, Z.-D., Wang, L.-Q., Liu, Y.-S., and Wu, F.-Y., 2009, Geochemical investigation of Early Cretaceous igneous rocks along an east-west traverse throughout the central Lhasa Terrane, Tibet: *Chemical Geology*, v. 268, no. 3, p. 298-312.
- Zhu, D.-C., Zhao, Z.-D., Niu, Y., Mo, X.-X., Chung, S.-L., Hou, Z.-Q., Wang, L.-Q., and Wu, F.-Y., 2011, The Lhasa Terrane: record of a microcontinent and its histories of drift and growth: *Earth and Planetary Science Letters*, v. 301, no. 1, p. 241-255, doi: 10.1016/j.epsl.2010.11.005.

## **DR2: ANALYTICAL AND NUMERICAL METHODS**

### **DR2a: Zircon U-Pb dating methods**

Six medium-grained sandstones were selected at regular intervals throughout the Dungsam Chu section of Siwalik sedimentary rocks (SJ1b, SJ2, SJ4, SJ6b, SJ9 and SJ12) and analyzed at CRPG, Nancy (France). Two further samples of similar grain size were selected once the change in provenance had been detected, within the relevant gap (i.e. between samples SJ6b and SJ9, where the change in provenance is observed). These samples were analyzed at NIGL, Keyworth (UK).

Prior to analysis, samples were dried and sieved to extract the <500- $\mu\text{m}$  fraction at Lancaster University. Heavy minerals were extracted at NIGL, BGS Keyworth (UK) by wet separation on a Haultain superpanner, and di-iodomethane heavy liquid (with a density of 3.3). Magnetic separation was kept to a minimum to avoid biasing mineral populations. Zircon grains were handpicked, taking special care to select all grain types with respect to morphology, color and grain size, within a particular fraction of the separate. The zircons were mounted in epoxy, polished and photographed to help identify the analyzed grains. They were also imaged by cathodo-luminescence using an FEI Scanning Electron Microscope to ensure suitable areas were targeted during analysis. Each analysis corresponds to a different zircon grain.

The zircons mounts of samples SJ1b, SJ2, SJ4, SJ6b, SJ9 and SJ12, were subsequently gold-plated at CRPG, Nancy (France). U-Pb zircon dating for these samples was performed using the CAMECA IMS 1270 E7 ion microprobe facility at CRPG. The analyzed masses were: 203.5 (background noise, measured for 4 sec),  $\text{Zr}_2\text{O}$  (4 sec),  $^{204}\text{Pb}$  (8 sec),  $^{206}\text{Pb}$  (4 sec),  $^{207}\text{Pb}$  (16 sec),  $^{208}\text{Pb}$  (4 sec),  $^{238}\text{U}$  (4 sec),  $^{238}\text{U}^{16}\text{O}$  (3 sec) and  $^{238}\text{U}^{16}\text{O}_2$  (3 sec). Counting was performed in mono-collection using an electron multiplier. Each analysis consists of 12 or 16 iterative cycles over each mass. The mass resolution was about 6000, which is sufficient to separate the molecular interferences. The primary current was ca. 5 nA using the duoplasmatron (oxygen source). The  $\text{O}^{2-}$  primary beam is a projected beam of about 20  $\mu\text{m}$  in diameter (corresponding to the projection of a diaphragm of 200  $\mu\text{m}$ ). Before each measurement, there is a 120-second pre-sputtering with a 10  $\mu\text{m}$  x 10  $\mu\text{m}$  raster, a centering of the secondary beam within the field aperture, the contrast aperture and the energy slit and a centering of the mass on  $\text{Zr}_2\text{O}$ .

The zircon reference material 91500, with an age of 1064 Ma (Wiedenbeck et al., 1995), was analyzed at regular intervals and was used for determination of the correlation line between  $^{206}\text{Pb}/^{238}\text{U}$  and  $\text{UO}/\text{U}$  in order to correct data for instrumental fractionation. The age calculations were based on the isotope ratios corrected for background noise and common lead (using  $^{204}\text{Pb}$ ). The U and Pb abundances are

calculated on the basis of the Zr<sub>2</sub>O and UO correlation for the standard, and the isotope ratio  $^{238}\text{U}/^{206}\text{Pb}$ . The  $^{207}\text{Pb}/^{206}\text{Pb}$  ratio is directly derived from each spot analysis.

U-Pb dating of zircons from samples SJ7 and SJ8 was performed using a Nu Instruments AttoM single-collector inductively coupled plasma mass spectrometer (SC-ICP-MS). The instrument was tuned such that oxides of U and Th represented less than 0.4% of the signal obtained from the metal ion peaks. The Nu AttoM SC-ICP-MS was used in peak-jumping mode with measurement on a MassCom secondary electron multiplier. The analyzed masses in each sweep were:  $^{202}\text{Hg}$ ,  $^{204}\text{Pb}+\text{Hg}$ ,  $^{206}\text{Pb}$ ,  $^{207}\text{Pb}$ , and  $^{235}\text{U}$ . Each data integration records 100 sweeps of the measured masses, which roughly equates to 0.22 seconds. Dwell times on each mass are 400  $\mu\text{s}$  on  $^{207}\text{Pb}$  and  $^{235}\text{U}$ , and 200  $\mu\text{s}$  on all other masses; the switching between masses takes 40  $\mu\text{s}$ .  $^{238}\text{U}$  is calculated using  $^{238}\text{U}/^{235}\text{U} = 137.818$ . Laser ablation was performed with a NewWave UP193SS solid-state laser ablation system. Ablation parameters were optimized to suit the Pb and U contents of the material and parameters adopted were a frequency of 10 Hz, with a fluence of 1.8 to 2.5 J/cm<sup>2</sup>, a 30 second ablation time, and a 25- $\mu\text{m}$  spot size. Three zircon reference materials (91500, GJ-1 and Plesovice; Jackson et al., 2004; Sláma et al., 2008; Wiedenbeck et al., 1995) were analyzed at regular intervals in order to correct data for instrumental fractionation. The average bias of the  $^{207}\text{Pb}/^{206}\text{Pb}$  and  $^{206}\text{Pb}/^{238}\text{U}$  ratios from preferred values derived by TIMS analysis are used for normalization.  $^{206}\text{Pb}/^{238}\text{U}$  and  $^{207}\text{Pb}/^{206}\text{Pb}$  uncertainties were propagated in the manner advocated by Horstwood (2008), utilizing the measurement uncertainty and the reproducibility of the ablation reference material used.

For the two sets of samples, respective in-house Excel spreadsheets were used for data reduction and error propagation, and Density Plotter (Vermeesch, 2012) was used for data presentation. Data reduction was undertaken with the age filters summarized in the following screening procedure table.

*Table: Data screening procedure*

|   |                                                                               |                                            |
|---|-------------------------------------------------------------------------------|--------------------------------------------|
| 1 | Failed                                                                        | Discarded                                  |
| 2 | $^{206}\text{Pb}/^{238}\text{U}$ age > 100 Ma, uncertainty >10%               | Discarded                                  |
| 3 | > 10% discordant                                                              | Discarded                                  |
| 4 | $^{206}\text{Pb}/^{238}\text{U}$ age 100 – 1200 Ma, >5% discordant            | Discarded                                  |
| 5 | Young grain - $^{206}\text{Pb}/^{238}\text{U}$ age < 100 Ma, < 10% discordant | $^{206}\text{Pb}/^{238}\text{U}$ age used  |
| 6 | $^{206}\text{Pb}/^{238}\text{U}$ age 100 – 1200 Ma, < 5% discordant           | $^{206}\text{Pb}/^{238}\text{U}$ age used  |
| 7 | $^{206}\text{Pb}/^{238}\text{U}$ age > 1200 Ma, < 10% discordant              | $^{207}\text{Pb}/^{206}\text{Pb}$ age used |

Concordant ages within the limits defined in this table were accepted. It is important to consider that young zircon grains contain low levels of radiogenic Pb, which means that even low levels of common

Pb may lead to discordance. Many of the young analyzed grains in this study have been discarded in order for robustness of the ages to prevail. Data are presented in DR 3-6. Concordia diagrams for each sample are presented in Figure DR2a-1, below.

### **Dr2b: Rutile U-Pb dating method**

Prior to analysis, the sample was dried, sieved (fraction < 500 µm) and washed with tap water at Lancaster University. Heavy minerals were extracted by wet separation on a Haultain superpanner, standard di-iodomethane heavy liquid (density of 3.3), and magnetic separation, which was kept to a minimum to avoid biasing mineral populations, at the NERC Isotope Geosciences Laboratory, Keyworth, UK (NIGL). Rutile grains were hand-picked, taking special care to select all grain types with respect to morphology, colour and grain size, within a particular fraction of the separate.

The rutiles were mounted in epoxy, polished, and photographed to help identify the analysed grains. U-Pb rutile dating was performed using a Nu Instruments AttoM single-collector inductively coupled plasma mass spectrometer (SC-ICP-MS) at NIGL. The instrument was tuned to ensure that ThO and UO were less than 0.4%. The Nu AttoM SC-ICP-MS was used in peak-jumping mode with measurement on a MassCom secondary electron multiplier. The analysed masses in each sweep were:  $^{202}\text{Hg}$ ,  $^{204}\text{Pb}+\text{Hg}$ ,  $^{206}\text{Pb}$ ,  $^{207}\text{Pb}$ , and  $^{235}\text{U}$ . Each data integration records 100 sweeps of the measured masses, which roughly equates to 0.22 seconds. Dwell times on each mass are 400 µs on  $^{207}\text{Pb}$  and  $^{235}\text{U}$ , and 200 µs on all other masses; the switching between masses takes 40 µs.  $^{238}\text{U}$  is calculated using  $^{238}\text{U}/^{235}\text{U} = 137.818$ .

Laser ablation was performed using a New Wave Research UP193SS laser ablation system, with a low-volume cell (Horstwood et al., 2003). This cell has a washout to less than 1% of the peak signal in less than one second. Ablation parameters were optimized to suit the Pb and U contents with a frequency of 5Hz, a fluence of 1.5 to 3.0 J/cm<sup>2</sup>, a 30 second ablation time, and a 30 to 35 µm spot size.

Four rutile reference materials, Sugluk-4, PCA-S207 (Bracciali et al., 2013) and R10 (Luvizotto et al., 2009) were analysed at regular intervals in order to correct data for instrumental fractionation. The average bias of the  $^{207}\text{Pb}/^{206}\text{Pb}$  and  $^{206}\text{Pb}/^{238}\text{U}$  ratios from preferred values derived by TIMS analysis are used for normalization.  $^{206}\text{Pb}/^{238}\text{U}$  and  $^{207}\text{Pb}/^{206}\text{Pb}$  uncertainties were propagated in the manner advocated by Horstwood (2008), utilising the measurement uncertainty and the reproducibility of the ablation reference material used.

Rutile commonly incorporates a significant amount of common Pb during crystallisation, and as a result is typically discordant in the U-Pb isotope system. Following the approach of Chew et al. (2011),

a  $^{207}\text{Pb}$ -based correction was employed, using an iterative approach to obtain a  $^{207}\text{Pb}/^{206}\text{Pb}$  intercept value based on a starting estimate generated from the terrestrial Pb evolution model of Stacey and Kramers (1975). This was used to calculate rutile  $^{207}\text{Pb}$ -corrected  $^{206}\text{Pb}/^{238}\text{U}$  ages.

Data reduction of rutile measurements was undertaken with the age filters summarised in the following screening procedure table.

*Table: U-Pb rutile data screening procedure*

|                                                            |           |
|------------------------------------------------------------|-----------|
| Failed                                                     | Discarded |
| $^{207}\text{Pb}$ -corr. age > 100 Ma, uncertainty > 10 %  | Discarded |
| $^{207}\text{Pb}$ -corr. age 10-100 Ma, uncertainty > 20 % | Discarded |
| $^{207}\text{Pb}$ -corr. age < 10 Ma, uncertainty > 25 %   | Discarded |
| All other ages                                             | Accepted  |

The analytical results are presented in Data Repository 7 and the accepted ages are plotted in figure DR2b-1 below.

## References cited

- Bracciali, L., Parrish, R. R., Horstwood, M. S., Condon, D. J., and Najman, Y., 2013, U Pb LA-(MC)-ICP-MS dating of rutile: New reference materials and applications to sedimentary provenance: *Chemical Geology*, v. 347, p. 82-101.
- Chew, D. M., Sylvester, P. J., and Tubrett, M. N., 2011, U–Pb and Th–Pb dating of apatite by LA-ICPMS: *Chemical Geology*, v. 280, no. 1, p. 200-216.
- Horstwood, M., 2008, Data reduction strategies, uncertainty assessment and resolution of LA-(MC)-ICP-MD isotope data, *Mineralogical Association of Canada*, v. 40.
- Horstwood, M. S., Foster, G. L., Parrish, R. R., Noble, S. R., and Nowell, G. M., 2003, Common-Pb corrected in situ U–Pb accessory mineral geochronology by LA-MC-ICP-MS: *Journal of Analytical Atomic Spectrometry*, v. 18, no. 8, p. 837-846.
- Luvizotto, G., Zack, T., Meyer, H., Ludwig, T., Triebold, S., Kronz, A., Münker, C., Stockli, D., Prowatke, S., and Klemme, S., 2009, Rutile crystals as potential trace element and isotope mineral standards for microanalysis: *Chemical Geology*, v. 261, no. 3, p. 346-369.
- Stacey, J. t., and Kramers, J., 1975, Approximation of terrestrial lead isotope evolution by a two-stage model: *Earth and planetary science letters*, v. 26, no. 2, p. 207-221.
- Vermeesch, P., 2012, On the visualisation of detrital age distributions: *Chemical Geology*, v. 312, p. 190-194.

## DR2C: Stress calculation

Here we summarize the steps Copley et al. (2011) used to calculate the distribution of stress in the Indian lithosphere. Earthquakes and active faults have been observed where the Indian lithosphere bends beneath the Himalaya, and also further south within the Indian shield. Copley et al. (2011) therefore assumed that the stress within the lithosphere is limited to what can be supported by the faults before they break in earthquakes. Two independent estimates of the force balance were then used to estimate the stress distribution within the Indian plate: the locations, mechanisms, and stress drops of earthquakes within the Indian lithosphere (which give an increase in differential stress with depth of  $\sim 5 \text{ MPa km}^{-1}$ ), and the net force transmitted through the Indian plate (estimated from the motion of the plate and the forces exerted between India and Tibet;  $5.5 \pm 1.5 \text{ TN m}^{-1}$  along-strike).

If the stress drops in the earthquakes are summed over the seismogenic layer, the total force supported by the faults can be estimated to be approximately the same as the independent estimate of the total force transmitted through the Indian plate. This result has two implications: (1) the majority of the force transmitted through the Indian plate is supported by stresses on faults, and (2) the stress drops in the earthquakes represent close to the total pre-earthquake shear stresses on the faults. Point (2) means that the variation of stress drop with depth gives an estimate of the total stress distribution within the Indian plate, south of the region of bending beneath the Ganges foreland basin.

Beneath the Ganges foreland basin, the far-field tectonic compression is still present, but there are additional stresses related to the bending of the Indian plate beneath the Himalaya. This results in shallow normal faulting, and deeper thrust faulting. The depth of the transition from normal- to thrust-faulting is at  $25 \pm 5 \text{ km}$ . Copley et al. (2011) used this transition depth, along with the constraint that the net force transmitted through the lithosphere should match the far-field tectonic driving stresses, to calculate the variation of stress with depth within the Indian lithosphere underlying the foreland basin. They found that, in order to match the depth of transition from normal faulting to thrust faulting, and to also obtain the correct net force transmitted through the lithosphere, the faults underlying the foreland basin must have similar coefficients of friction to those further south within the Indian shield. In this foreland region, faults that cut through the entire seismogenic layer (e.g. the Oldham Fault on the northern margin of the Shillong Plateau that ruptured in a M8 earthquake in 1897) have resolved stresses that result in thrust motion. Faults that only cut the upper part of the seismogenic layer slip in a normal sense, and those that cut only the lower part slip as thrusts (see focal mechanisms in Figure DR2C(a)).

The variation of stress with depth suggests that differential stresses at the brittle-ductile transition are  $\sim 1.5$  times higher in the foreland basin than further south within the Indian shield. These estimates therefore provide a picture of the changes in stress distribution as an area of the Indian Plate moves



northwards towards the Tibetan Plateau, and becomes affected by the stresses related to bending beneath the Himalaya.

In models of dislocation creep, the relationship between stress and strain-rate is of the form  $\dot{\epsilon} \propto \sigma^3$  where  $\dot{\epsilon}$  is strain rate, and  $\sigma$  is stress. For rate-dependent fault creep, a change in shear stress would result in a change in sliding velocity by a factor of  $\exp(\Delta\sigma/aN)$ , where  $\Delta\sigma$  is the change in stress,  $a$  is the rate-dependent frictional parameter, and  $N$  is the effective normal stress. In either of these rheological laws, a change in the driving stress by a factor of 1.5 would result in a change in the fault-loading rate by a factor of 2 or more.

In these calculations we neglect local effects relating to erosion, deposition, isostatic balance, and strain accumulation in the hangingwalls and footwalls of the faults. As displacement accumulates on a thrust fault, the difference in gravitational potential energy across the fault increases, which acts to inhibit motion. This effect can be decreased if material is eroded from the hangingwall and deposited in the footwall, and if vertical motions occur to maintain isostatic equilibrium. Our inference that the slip rates on the faults on the margins of the Shillong Plateau has through time, rather than decreased, implies that these local effects on faulting are small compared to the imposed far-field compressive and bending stresses.

#### **References cited:**

- Copley, A., Avouac, J. P., Hollingsworth, J., and Leprince, S., 2011, The 2001 Mw 7.6 Bhuj earthquake, low fault friction, and the crustal support of plate driving forces in India: *Journal of Geophysical Research: Solid Earth*, v. 116, no. B8, doi: 10.1029/2010JB008137.
- Förste, C., Bruinsma, S., Flechtner, F., Marty, J., Lemoine, J., Dahle, C., Abrikosov, O., Neumayer, H., Biancale, R., and Barthelmes, F., A preliminary update of the Direct approach GOCE Processing and a new release of EIGEN-6C, *in* *Proceedings AGU Fall Meeting Abstracts 2012*, Volume 1, p. 0923.
- Horstwood, M., 2008, Data reduction strategies, uncertainty assessment and resolution of LA-(MC-) ICP-MS isotope data, *Mineralogical Association of Canada*, v. 40.
- Jackson, S. E., Pearson, N. J., Griffin, W. L., and Belousova, E. A., 2004, The application of laser ablation-inductively coupled plasma-mass spectrometry to in situ U–Pb zircon geochronology: *Chemical Geology*, v. 211, no. 1, p. 47-69, doi: 10.1016/j.chemgeo.2004.06.017.
- Ludwig, K. R., 2003, User's manual for Isoplot 3.00: a geochronological toolkit for Microsoft Excel, *Kenneth R. Ludwig*, v. 4.

- Sláma, J., Košler, J., Condon, D. J., Crowley, J. L., Gerdes, A., Hanchar, J. M., Horstwood, M. S., Morris, G. A., Nasdala, L., and Norberg, N., 2008, Plešovice zircon—a new natural reference material for U–Pb and Hf isotopic microanalysis: *Chemical Geology*, v. 249, no. 1, p. 1-35, doi: 10.1016/j.chemgeo.2007.11.005.
- Vermeesch, P., 2012, On the visualisation of detrital age distributions: *Chemical Geology*, v. 312, p. 190-194, doi: 10.1016/j.chemgeo.2012.04.021.
- Wiedenbeck, M., Alle, P., Corfu, F., Griffin, W., Meier, M., Oberli, F., Quadt, A. v., Roddick, J., and Spiegel, W., 1995, Three natural zircon standards for U-Th-Pb, Lu-Hf, trace element and REE analyses: *Geostandards newsletter*, v. 19, no. 1, p. 1-23.

### Supplementary figure captions:

**Fig. DR2a-1:** Zircon U-Pb concordia diagrams of samples from the Dungsam Chu section. Data are plotted as Wetherill concordia diagrams, using the Isoplot v. 4.14 add-in for Microsoft Excel (Ludwig, 2003), after data screening. The dotted dark blue line is the concordia curve where ages are indicated in Ma. Data point ellipses are at the  $2\sigma$  level.

**Fig. DR2b-1:** Detrital rutile U-Pb ages for the sample SJ8 from the Dungsam Chu section, plotted as adaptive Kernel density plots (Vermeesch, 2012) with overlying histograms; n=number of dated grains. Inset: rutile U-Pb data from modern rivers draining the Himalayan syntaxis (solid line, n=138) and Himalaya outwith the syntaxis (dashed line, n=282). Note the uniquely short lag time for syntaxial rivers (from Bracciali et al 2016 and refs therein).

**Fig. DR2C:** (a) Topography and focal mechanisms for the India-Tibet region. Black focal mechanisms are thrust and normal earthquakes within the Indian lithosphere, labeled with their centroid depth in km and moment magnitude (see Copley et al. (2011) for details). Thrust faulting occurs throughout the seismogenic layer in central India. Beneath the foreland basin, shallow normal faulting is underlain by deeper thrust faulting. The red focal mechanism corresponds to the Bhuj earthquake (case study of Copley et al., 2011). SP, Shillong Plateau; RK, Rann of Kachchh. (b) Free-air gravity anomaly in the same region as shown in (a), from the EIGEN-6C gravity model (Förste et al., 2012). The contour interval is 50 mGal. The yellow dashed line shows the southern edge of the negative anomaly representing the foreland basin in the central and western part of the Himalayan arc. The Shillong Plateau is the positive anomaly marked 'SP'. (c) and (e) show profiles of differential stress against depth from locations in central India, and in the foreland basin, as shown schematically in (d) (calculations from Copley et al., 2011).

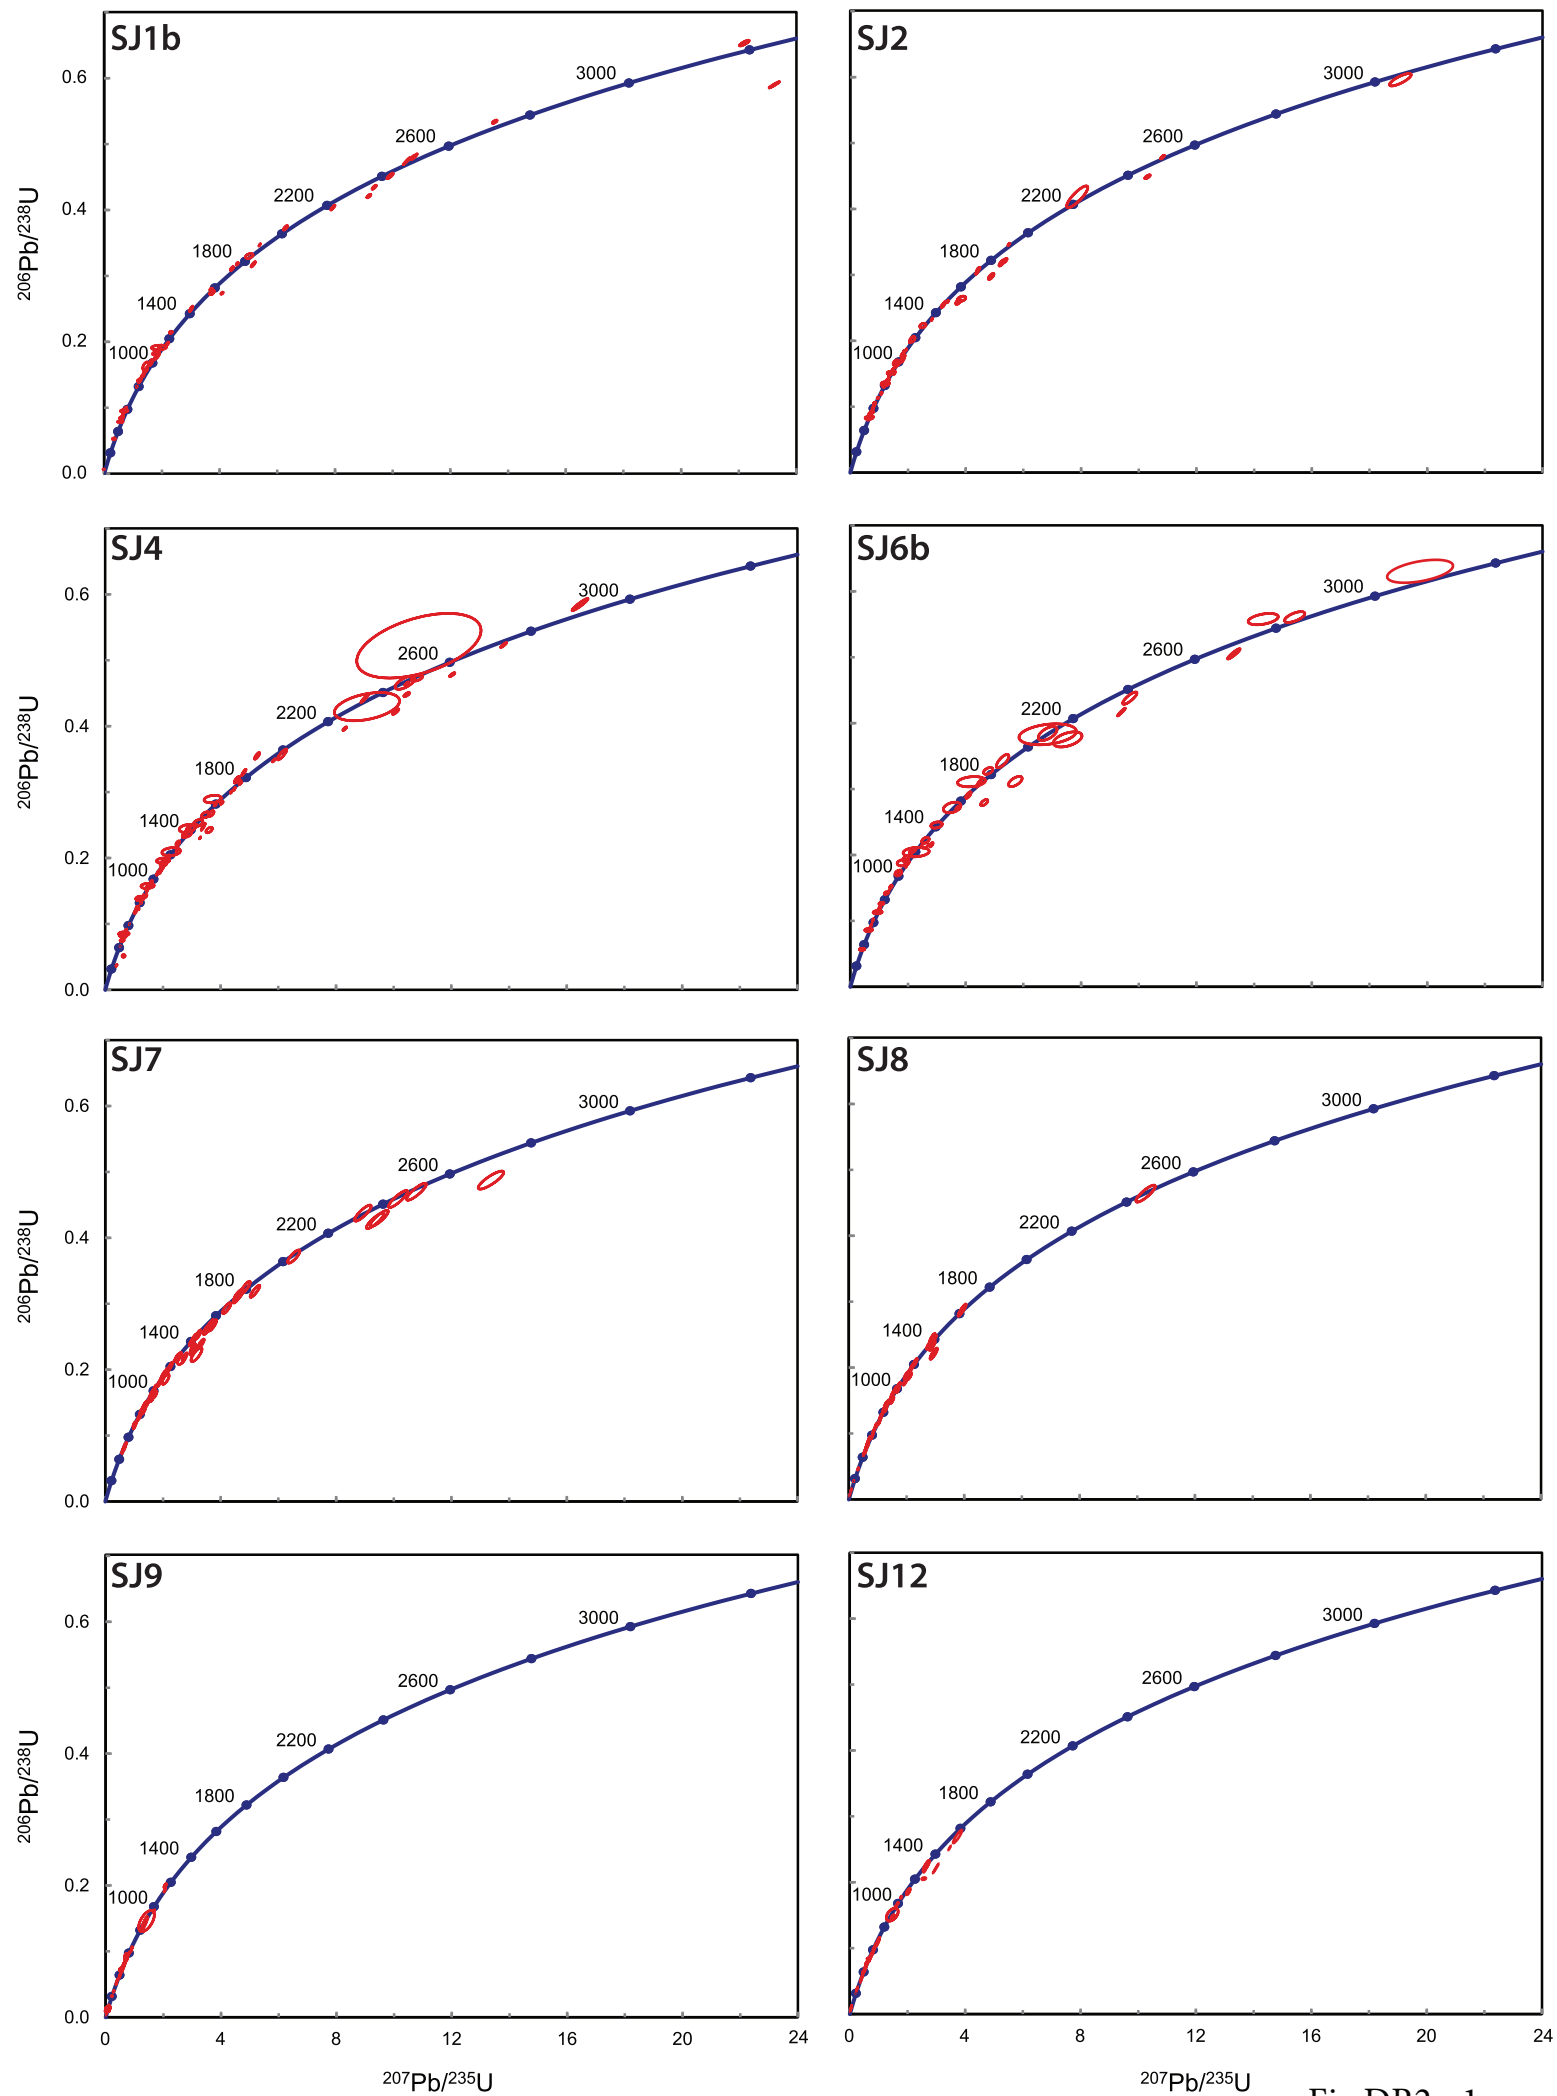

Fig DR2a-1

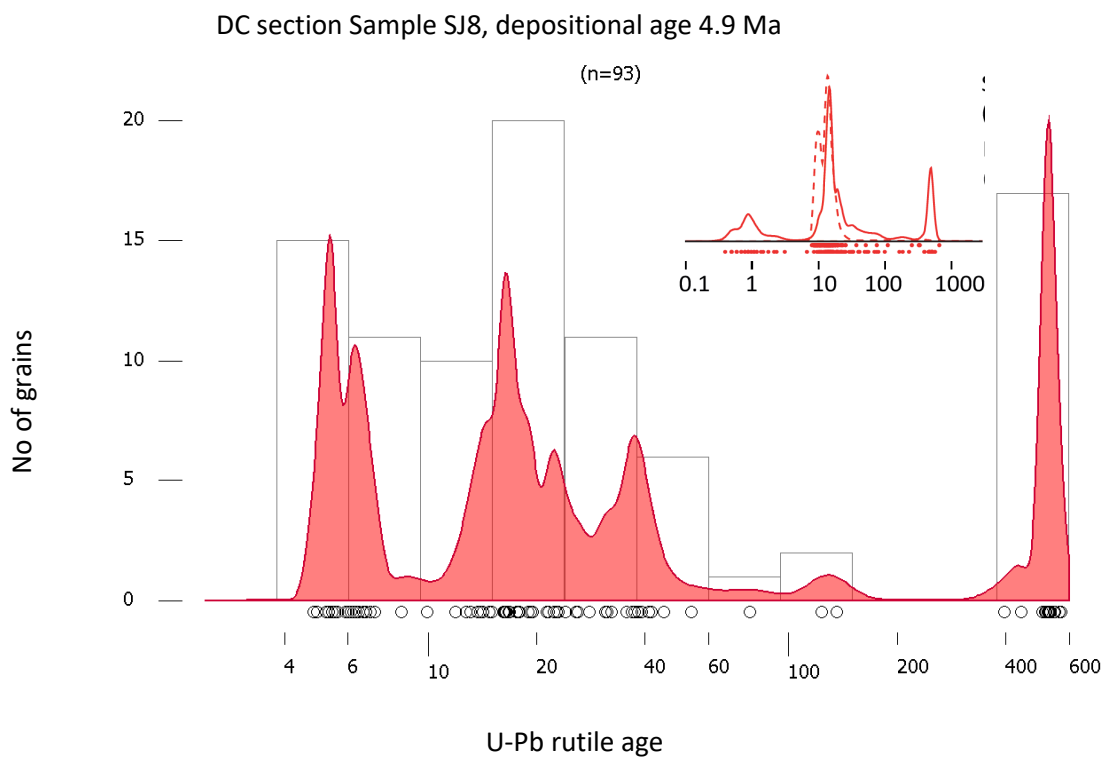

Fig DR2b-1

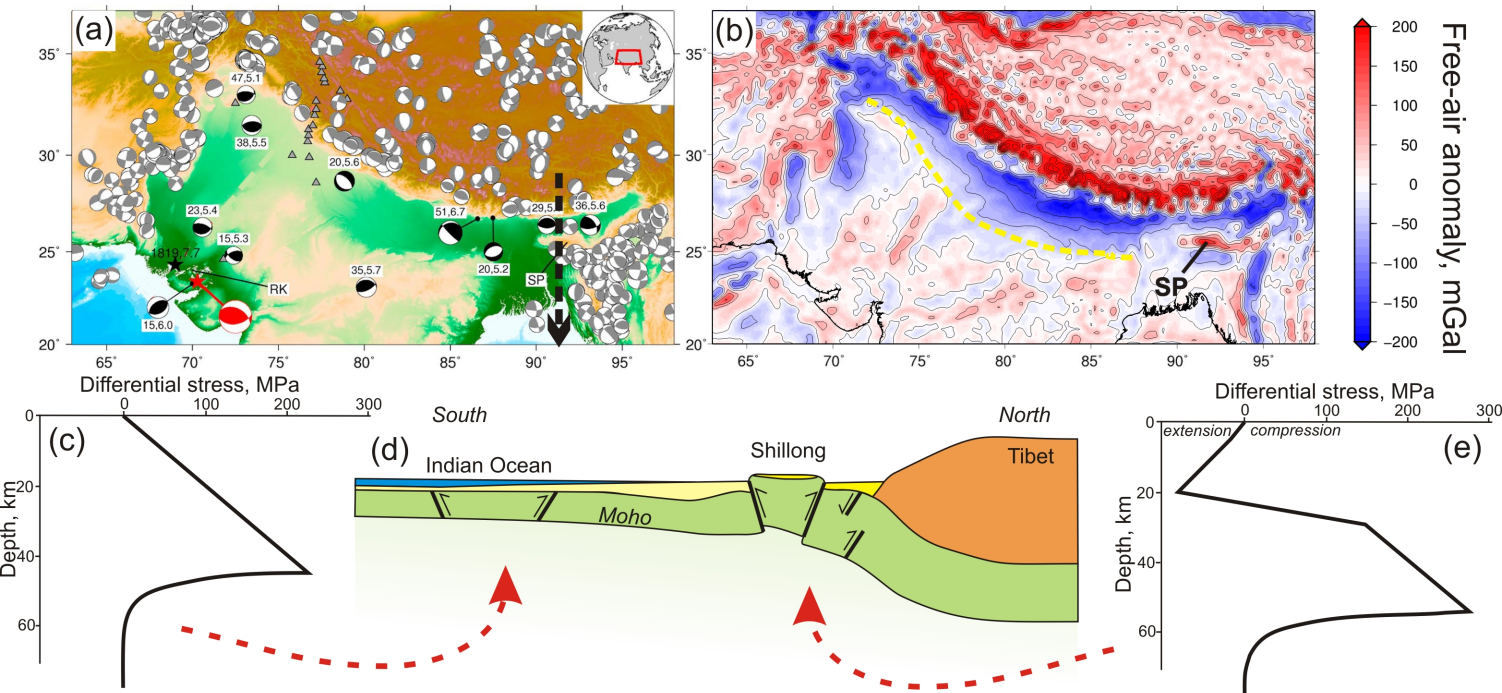

Fig DR2c







|     |    |       |       |       |     |      |     |        |       |       |       |       |       |       |       |      |       |     |       |     |       |      |       |      |       |  |
|-----|----|-------|-------|-------|-----|------|-----|--------|-------|-------|-------|-------|-------|-------|-------|------|-------|-----|-------|-----|-------|------|-------|------|-------|--|
| S_9 | 1  | 0.062 | 0.000 | 0.019 | 125 | 1497 | 80  | 10.288 | 2.3   | 0.062 | 0.0   | 0.028 | 2.3   | 0.097 | 2.3   | 1.00 | 697   | 10  | 598   | 26  | 613   | 22   | 24    | 598  | 26    |  |
| S_9 | 20 | 0.093 | 0.000 | 0.085 | 29  | 238  | 84  | 9.891  | 2.0   | 0.094 | 0.0   | 0.382 | 2.3   | 0.053 | 2.9   | 0.83 | 745   | 22  | 534   | 24  | 331   | 24   | 534   | 24   |       |  |
| S_9 | 14 | 0.064 | 0.000 | 0.053 | 75  | 815  | 116 | 8.988  | 0.5   | 0.063 | 0.0   | 0.822 | 0.5   | 0.106 | 0.5   | 0.89 | 704   | 10  | 652   | 6   | 683   | 6    | 684   | 6    |       |  |
| S_9 | 21 | 0.074 | 0.000 | 0.116 | 18  | 149  | 4   | 9.368  | 0.4   | 0.069 | 0.0   | 1.365 | 4.9   | 0.144 | 4.4   | 0.89 | 898   | 90  | 864   | 70  | 874   | 57   | 1.1   | 864  | 70    |  |
| S_9 | 20 | 0.093 | 0.000 | 0.093 | 38  | 285  | 947 | 1.3    | 1.070 | 0.1   | 0.347 | 0.699 | 1.3   | 0.152 | 0.1   | 0.89 | 722   | 10  | 687   | 22  | 1.1   | 807  | 22    |      |       |  |
| S_9 | 81 | 0.090 | 0.001 | 0.114 | 24  | 193  | 40  | 6.831  | 7.2   | 0.071 | 0.1   | 1.430 | 12.5  | 0.148 | 7.2   | 0.58 | 953   | 390 | 881   | 118 | 902   | 144  | 23    | 881  | 118   |  |
| S_9 | 18 | 0.093 | 0.000 | 0.163 | 14  | 110  | 206 | 0.8    | 0.076 | 0.0   | 0.3   | 0.161 | 0.0   | 0.068 | 0.0   | 0.89 | 704   | 10  | 652   | 6   | 683   | 6    | 684   | 6    |       |  |
| S_9 | 38 | 0.078 | 0.000 | 0.046 | 127 | 767  | 112 | 5.777  | 0.1   | 0.071 | 0.0   | 2.053 | 0.1   | 0.193 | 0.9   | 0.97 | 1133  | 9   | 1138  | 19  | 1037  | 13   | -0.2  | 1138 | 19    |  |
| S_9 | 69 | 0.093 | 0.000 | 0.136 | 89  | 154  | 174 | 5.001  | 1.0   | 0.071 | 0.0   | 1.020 | 1.0   | 0.207 | 1.0   | 0.97 | 1133  | 9   | 1138  | 19  | 1037  | 13   | -0.2  | 1138 | 19    |  |
| S_9 | 1  | 0.097 | 0.000 | 0.129 | 184 | 881  | 1   | 380    | 4     | 0.097 | 0.0   | 3.250 | 0.8   | 0.243 | 0.7   | 0.95 | 1564  | 9   | 1405  | 18  | 1469  | 12   | 44    | 1564 | 9     |  |
| S_9 | 63 | 0.087 | 0.002 | 0.275 | 15  | 218  | 148 | 12.013 | 1.5   | 0.052 | 0.1   | 0.558 | 9.8   | 0.079 | 1.5   | 0.15 | 283   | 416 | 492   | 14  | 457   | 71   | -7.7  | ND   | N.D   |  |
| S_9 | 61 | 0.103 | 0.460 | 0.139 | 125 | 163  | 2   | 1.39   | 1.2   | 0.072 | 0.1   | 7.2   | 0.19  | 0.1   | 7.2   | 0.19 | 0.1   | 7.2 | 0.19  | 0.1 | 7.2   | 0.19 | 0.1   | 7.2  | 0.19  |  |
| S_9 | 83 | 0.067 | 0.001 | 0.133 | 26  | 823  | 159 | 30.429 | 10.4  | 0.056 | 0.1   | 0.263 | 12.5  | 0.033 | 10.4  | 0.83 | 448   | 296 | 208   | 43  | 229   | 51   | 9.1   | ND   | N.D   |  |
| S_9 | 77 | 0.064 | 0.001 | 0.095 | 27  | 612  | 107 | 19.408 | 4.5   | 0.057 | 0.0   | 0.452 | 4.7   | 0.051 | 4.5   | 0.94 | 476   | 69  | 324   | 29  | 343   | 27   | 5.6   | ND   | N.D   |  |
| S_9 | 65 | 0.082 | 0.008 | 0.056 | 54  | 986  | 544 | 3.9    | 0.054 | 0.1   | 0.154 | 0.1   | 0.021 | 0.1   | 0.021 | 0.1  | 0.021 | 0.1 | 0.021 | 0.1 | 0.021 | 0.1  | 0.021 | 0.1  | 0.021 |  |
| S_9 | 39 | 0.070 | 0.001 | 0.048 | 50  | 1987 | 29  | 33.901 | 9.7   | 0.054 | 0.1   | 0.219 | 11.4  | 0.029 | 9.7   | 0.86 | 360   | 256 | 187   | 36  | 201   | 41   | 6.6   | ND   | N.D   |  |
| S_9 | 84 | 0.062 | 0.000 | 0.038 | 53  | 896  | 41  | 14.983 | 0.4   | 0.059 | 0.0   | 0.780 | 4.2   | 0.069 | 4.0   | 0.96 | 570   | 52  | 428   | 33  | 451   | 30   | 5.1   | ND   | N.D   |  |
| S_9 | 70 | 0.059 | 0.000 | 0.048 | 50  | 180  | 324 | 10.009 | 4.0   | 0.059 | 0.0   | 0.420 | 46.6  | 0.04  | 4.0   | 0.96 | 570   | 52  | 428   | 33  | 451   | 30   | 5.1   | ND   | N.D   |  |
| S_9 | 21 | 0.060 | 0.000 | 0.054 | 58  | 1385 | 129 | 20.576 | 7.5   | 0.057 | 0.0   | 0.780 | 2.7   | 0.049 | 2.5   | 0.92 | 484   | 46  | 306   | 16  | 327   | 16   | 6.4   | ND   | N.D   |  |
| S_9 | 39 | 0.070 | 0.000 | 0.048 | 50  | 180  | 324 | 10.009 | 4.0   | 0.059 | 0.0   | 0.420 | 46.6  | 0.04  | 4.0   | 0.96 | 570   | 52  | 428   | 33  | 451   | 30   | 5.1   | ND   | N.D   |  |
| S_9 | 84 | 0.062 | 0.000 | 0.038 | 53  | 896  | 41  | 14.983 | 0.4   | 0.059 | 0.0   | 0.780 | 4.2   | 0.069 | 4.0   | 0.96 | 570   | 52  | 428   | 33  | 451   | 30   | 5.1   | ND   | N.D   |  |
| S_9 | 70 | 0.059 | 0.000 | 0.048 | 50  | 180  | 324 | 10.009 | 4.0   | 0.059 | 0.0   | 0.420 | 46.6  | 0.04  | 4.0   | 0.96 | 570   | 52  | 428   | 33  | 451   | 30   | 5.1   | ND   | N.D   |  |
| S_9 | 21 | 0.060 | 0.000 | 0.054 | 58  | 1385 | 129 | 20.576 | 7.5   | 0.057 | 0.0   | 0.780 | 2.7   | 0.049 | 2.5   | 0.92 | 484   | 46  | 306   | 16  | 327   | 16   | 6.4   | ND   | N.D   |  |
| S_9 | 39 | 0.070 | 0.000 | 0.048 | 50  | 180  | 324 | 10.009 | 4.0   | 0.059 | 0.0   | 0.420 | 46.6  | 0.04  | 4.0   | 0.96 | 570   | 52  | 428   | 33  | 451   | 30   | 5.1   | ND   | N.D   |  |
| S_9 | 84 | 0.062 | 0.000 | 0.038 | 53  | 896  | 41  | 14.983 | 0.4   | 0.059 | 0.0   | 0.780 | 4.2   | 0.069 | 4.0   | 0.96 | 570   | 52  | 428   | 33  | 451   | 30   | 5.1   | ND   | N.D   |  |
| S_9 | 70 | 0.059 | 0.000 | 0.048 | 50  | 180  | 324 | 10.009 | 4.0   | 0.059 | 0.0   | 0.420 | 46.6  | 0.04  | 4.0   | 0.96 | 570   | 52  | 428   | 33  | 451   | 30   | 5.1   | ND   | N.D   |  |
| S_9 | 21 | 0.060 | 0.000 | 0.054 | 58  | 1385 | 129 | 20.576 | 7.5   | 0.057 | 0.0   | 0.780 | 2.7   | 0.049 | 2.5   | 0.92 | 484   | 46  | 306   | 16  | 327   | 16   | 6.4   | ND   | N.D   |  |
| S_9 | 39 | 0.070 | 0.000 | 0.048 | 50  | 180  | 324 | 10.009 | 4.0   | 0.059 | 0.0   | 0.420 | 46.6  | 0.04  | 4.0   | 0.96 | 570   | 52  | 428   | 33  | 451   | 30   | 5.1   | ND   | N.D   |  |
| S_9 | 84 | 0.062 | 0.000 | 0.038 | 53  | 896  | 41  | 14.983 | 0.4   | 0.059 | 0.0   | 0.780 | 4.2   | 0.069 | 4.0   | 0.96 | 570   | 52  | 428   | 33  | 451   | 30   | 5.1   | ND   | N.D   |  |
| S_9 | 70 | 0.059 | 0.000 | 0.048 | 50  | 180  | 324 | 10.009 | 4.0   | 0.059 | 0.0   | 0.420 | 46.6  | 0.04  | 4.0   | 0.96 | 570   | 52  | 428   | 33  | 451   | 30   | 5.1   | ND   | N.D   |  |
| S_9 | 21 | 0.060 | 0.000 | 0.054 | 58  | 1385 | 129 | 20.576 | 7.5   | 0.057 | 0.0   | 0.780 | 2.7   | 0.049 | 2.5   | 0.92 | 484   | 46  | 306   | 16  | 327   | 16   | 6.4   | ND   | N.D   |  |
| S_9 | 39 | 0.070 | 0.000 | 0.048 | 50  | 180  | 324 | 10.009 | 4.0   | 0.059 | 0.0   | 0.420 | 46.6  | 0.04  | 4.0   | 0.96 | 570   | 52  | 428   | 33  | 451   | 30   | 5.1   | ND   | N.D   |  |
| S_9 | 84 | 0.062 | 0.000 | 0.038 | 53  | 896  | 41  | 14.983 | 0.4   | 0.059 | 0.0   | 0.780 | 4.2   | 0.069 | 4.0   | 0.96 | 570   | 52  | 428   | 33  | 451   | 30   | 5.1   | ND   | N.D   |  |
| S_9 | 70 | 0.059 | 0.000 | 0.048 | 50  | 180  | 324 | 10.009 | 4.0   | 0.059 | 0.0   | 0.420 | 46.6  | 0.04  | 4.0   | 0.96 | 570   | 52  | 428   | 33  | 451   | 30   | 5.1   | ND   | N.D   |  |
| S_9 | 21 | 0.060 | 0.000 | 0.054 | 58  | 1385 | 129 | 20.576 | 7.5   | 0.057 | 0.0   | 0.780 | 2.7   | 0.049 | 2.5   | 0.92 | 484   | 46  | 306   | 16  | 327   | 16   | 6.4   | ND   | N.D   |  |
| S_9 | 39 | 0.070 | 0.000 | 0.048 | 50  | 180  | 324 | 10.009 | 4.0   | 0.059 | 0.0   | 0.420 | 46.6  | 0.04  | 4.0   | 0.96 | 570   | 52  | 428   | 33  | 451   | 30   | 5.1   | ND   | N.D   |  |
| S_9 | 84 | 0.062 | 0.000 | 0.038 | 53  | 896  | 41  | 14.983 | 0.4   | 0.059 | 0.0   | 0.780 | 4.2   | 0.069 | 4.0   | 0.96 | 570   | 52  | 428   | 33  | 451   | 30   | 5.1   | ND   | N.D   |  |
| S_9 | 70 | 0.059 | 0.000 | 0.048 | 50  | 180  | 324 | 10.009 | 4.0   | 0.059 | 0.0   | 0.420 | 46.6  | 0.04  | 4.0   | 0.96 | 570   | 52  | 428   | 33  | 451   | 30   | 5.1   | ND   | N.D   |  |
| S_9 | 21 | 0.060 | 0.000 | 0.054 | 58  | 1385 | 129 | 20.576 | 7.5   | 0.057 | 0.0   | 0.780 | 2.7   | 0.049 | 2.5   | 0.92 | 484   | 46  | 306   | 16  | 327   | 16   | 6.4   | ND   | N.D   |  |
| S_9 | 39 | 0.070 | 0.000 | 0.048 | 50  | 180  | 324 | 10.009 | 4.0   | 0.059 | 0.0   | 0.420 | 46.6  | 0.04  | 4.0   | 0.96 | 570   | 52  | 428   | 33  | 451   | 30   | 5.1   | ND   | N.D   |  |
| S_9 | 84 | 0.062 | 0.000 | 0.038 | 53  | 896  | 41  | 14.983 | 0.4   | 0.059 | 0.0   | 0.780 | 4.2   | 0.069 | 4.0   | 0.96 | 570   | 52  | 428   | 33  | 451   | 30   | 5.1   | ND   | N.D   |  |
| S_9 | 70 | 0.059 | 0.000 | 0.048 | 50  | 180  | 324 | 10.009 | 4.0   | 0.059 | 0.0   | 0.420 | 46.6  | 0.04  | 4.0   | 0.96 | 570   | 52  | 428   | 33  | 451   | 30   | 5.1   | ND   | N.D   |  |
| S_9 | 21 | 0.060 | 0.000 | 0.054 | 58  | 1385 | 129 | 20.576 | 7.5   | 0.057 | 0.0   | 0.780 | 2.7   | 0.049 | 2.5   | 0.92 | 484   | 46  | 306   | 16  | 327   | 16   | 6.4   | ND   | N.D   |  |
| S_9 | 39 | 0.070 | 0.000 | 0.048 | 50  | 180  | 324 | 10.009 | 4.0   | 0.059 | 0.0   | 0.420 | 46.6  | 0.04  | 4.0   | 0.96 | 570   | 52  | 428   | 33  | 451   | 30   | 5.1   | ND   | N.D   |  |
| S_9 | 84 | 0.062 | 0.000 | 0.038 | 53  | 896  | 41  | 14.983 | 0.4   | 0.059 | 0.0   | 0.780 | 4.2   | 0.069 | 4.0   | 0.96 | 570   | 52  | 428   | 33  | 451   | 30   | 5.1   | ND   | N.D   |  |
| S_9 | 70 | 0.059 | 0.000 | 0.048 | 50  | 180  | 324 | 10.009 | 4.0   | 0.059 | 0.0   | 0.420 | 46.6  | 0.04  | 4.0   | 0.96 | 570   | 52  | 428   | 33  | 451   | 30   | 5.1   | ND   | N.D   |  |
| S_9 | 21 | 0.060 | 0.000 | 0.054 | 58  | 1385 | 129 | 20.576 | 7.5   | 0.057 | 0.0   | 0.780 | 2.7   | 0.049 | 2.5   | 0.92 | 484   | 46  | 306   | 16  | 327   | 16   | 6.4   | ND   | N.D   |  |
| S_9 | 39 | 0.070 | 0.000 | 0.048 | 50  | 180  | 324 | 10.009 | 4.0   | 0.059 | 0.0   | 0.420 | 46.6  | 0.04  | 4.0   | 0.96 | 570   | 52  | 428   | 33  | 451   | 30   | 5.1   | ND   | N.D   |  |
| S_9 | 84 | 0.062 | 0.000 | 0.038 | 53  | 896  | 41  | 14.983 | 0.4   | 0.059 | 0.0   | 0.780 | 4.2   | 0.069 | 4.0   | 0.96 | 570   | 52  | 428   | 33  | 451   | 30   | 5.1   | ND   | N.D   |  |
| S_9 | 70 | 0.059 | 0.000 | 0.048 | 50  | 180  | 324 | 10.009 | 4.0   | 0.059 | 0.0   | 0.420 | 46.6  | 0.04  | 4.0   | 0.96 | 570   | 52  | 428   | 33  | 451   | 30   | 5.1   | ND   | N.D   |  |
| S_9 | 21 | 0.060 | 0.000 | 0.054 | 58  | 1385 | 129 | 20.576 | 7.5   | 0.057 | 0.0   | 0.780 | 2.7   | 0.049 | 2.5   | 0.92 | 484   | 46  | 306   | 16  | 327   | 16   | 6.4   | ND   | N.D   |  |
| S_9 | 39 | 0.070 | 0.000 | 0.048 | 50  | 180  | 324 | 10.009 | 4.0   | 0.059 | 0.0   | 0.420 | 46.6  | 0.04  | 4.0   | 0.96 | 570   | 52  | 428   | 33  | 451   | 30   | 5.1   | ND   | N.D   |  |
| S_9 | 84 | 0.062 | 0.000 | 0.038 | 53  | 896  | 41  | 14.983 | 0.4   | 0.059 | 0.0   | 0.780 | 4.2   | 0.069 | 4.0   | 0.96 | 570   | 52  | 428   | 33  | 451   | 30   | 5.1   | ND   | N.D   |  |
| S_9 | 70 | 0.059 | 0.000 | 0.048 | 50  | 180  | 324 | 10.009 | 4.0   | 0.059 | 0.0   | 0.420 | 46.6  | 0.04  | 4.0   | 0.96 | 570   | 52  | 428   | 33  | 451   | 30   | 5.1   | ND   | N.D   |  |
| S_9 | 21 | 0.060 | 0.000 | 0.054 | 58  | 1385 | 129 | 20.576 | 7.5   | 0.057 | 0.0   | 0.780 | 2.7   | 0.049 | 2.5   | 0.92 | 484   | 46  | 306   | 16  | 327   | 16   | 6.4   | ND   | N.D   |  |
| S_9 | 39 | 0.070 | 0.000 | 0.048 | 50  | 180  | 324 | 10.009 | 4.0   | 0.059 | 0.0   | 0.420 | 46.6  | 0.04  | 4.0   | 0.96 | 570   | 52  | 428   | 33  | 451   | 30   | 5.1   | ND   | N.D   |  |
| S_9 | 84 | 0.062 | 0.000 | 0.038 | 53  | 896  | 41  | 14.983 | 0.4   | 0.059 | 0.0   | 0.780 | 4.2   | 0.069 |       |      |       |     |       |     |       |      |       |      |       |  |



TABLE S4-10N PROBE ZIRCON LUPIN STANDARD

| Analysis # |    | Contents (ppm) |    | Data for Tera-Wasserburg plot       |                                     |                                     |       |                                     |       |                                     |       | Data for Normal - Wetherill plot    |      |        |                                     |       |                                     |       |        | Ages (Ma)                           |       |                                     |       |        |                                     |       |                                     |       |        |                                     |       |                                     |      |
|------------|----|----------------|----|-------------------------------------|-------------------------------------|-------------------------------------|-------|-------------------------------------|-------|-------------------------------------|-------|-------------------------------------|------|--------|-------------------------------------|-------|-------------------------------------|-------|--------|-------------------------------------|-------|-------------------------------------|-------|--------|-------------------------------------|-------|-------------------------------------|-------|--------|-------------------------------------|-------|-------------------------------------|------|
|            |    | Pb             | Th | <sup>206</sup> Pb/ <sup>238</sup> U | <sup>207</sup> Pb/ <sup>235</sup> U | <sup>206</sup> Pb/ <sup>238</sup> U | to %  | <sup>207</sup> Pb/ <sup>235</sup> U | to %  | <sup>206</sup> Pb/ <sup>238</sup> U | to %  | <sup>207</sup> Pb/ <sup>235</sup> U | to % | $\rho$ | <sup>206</sup> Pb/ <sup>238</sup> U | to %  | <sup>207</sup> Pb/ <sup>235</sup> U | to %  | $\rho$ | <sup>206</sup> Pb/ <sup>238</sup> U | to %  | <sup>207</sup> Pb/ <sup>235</sup> U | to %  | $\rho$ | <sup>206</sup> Pb/ <sup>238</sup> U | to %  | <sup>207</sup> Pb/ <sup>235</sup> U | to %  | $\rho$ | <sup>206</sup> Pb/ <sup>238</sup> U | to %  | <sup>207</sup> Pb/ <sup>235</sup> U | to % |
| 95000001   | 12 | 80             | 28 | 0.001                               | 5.982                               | 1.0                                 | 0.075 | 1.3                                 | 1.849 | 2.0                                 | 0.18  | 0.08                                | 0.28 | 1994   | 7.0                                 | 1.0   | 1.094                               | 7.0   | 1.0    | 1.094                               | 7.0   | 1.0                                 | 1.094 | 7.0    | 1.0                                 | 1.094 | 7.0                                 | 1.0   | 1.094  | 7.0                                 | 1.0   | 1.094                               | 7.0  |
| 95000010   | 15 | 95             | 34 | 0.002                               | 5.436                               | 1.3                                 | 0.078 | 3.7                                 | 1.885 | 3.9                                 | 0.184 | 1.3                                 | 0.32 | 1154   | 144                                 | 1.089 | 25                                  | 11.0  | 1.089  | 25                                  | 11.0  | 1.089                               | 25    | 11.0   | 1.089                               | 25    | 11.0                                | 1.089 | 25     | 11.0                                | 1.089 | 25                                  |      |
| 95000011   | 15 | 92             | 34 | 0.002                               | 5.525                               | 1.7                                 | 0.077 | 8.7                                 | 1.871 | 8.7                                 | 0.182 | 1.3                                 | 0.32 | 1154   | 144                                 | 1.089 | 25                                  | 11.0  | 1.089  | 25                                  | 11.0  | 1.089                               | 25    | 11.0   | 1.089                               | 25    | 11.0                                | 1.089 | 25     | 11.0                                | 1.089 | 25                                  |      |
| 95000012   | 13 | 82             | 29 | 0.001                               | 5.547                               | 0.7                                 | 0.077 | 3.7                                 | 1.885 | 2.7                                 | 0.182 | 0.9                                 | 0.35 | 1038   | 99                                  | 1.066 | 35                                  | 10.6  | 1.066  | 35                                  | 10.6  | 1.066                               | 35    | 10.6   | 1.066                               | 35    | 10.6                                | 1.066 | 35     | 10.6                                | 1.066 | 35                                  |      |
| 95000014   | 13 | 80             | 28 | 0.001                               | 5.447                               | 1.0                                 | 0.075 | 8.2                                 | 1.880 | 8.3                                 | 0.184 | 1.0                                 | 0.24 | 1099   | 164                                 | 1.087 | 20                                  | 10.78 | 1.087  | 20                                  | 10.78 | 1.087                               | 20    | 10.78  | 1.087                               | 20    | 10.78                               | 1.087 | 20     | 10.78                               | 1.087 | 20                                  |      |
| 95000015   | 13 | 81             | 29 | 0.001                               | 5.560                               | 0.7                                 | 0.072 | 3.9                                 | 1.879 | 3.9                                 | 0.180 | 0.7                                 | 0.16 | 999    | 154                                 | 1.066 | 35                                  | 10.64 | 1.066  | 35                                  | 10.64 | 1.066                               | 35    | 10.64  | 1.066                               | 35    | 10.64                               | 1.066 | 35     | 10.64                               | 1.066 | 35                                  |      |
| 95000016   | 13 | 81             | 28 | 0.001                               | 5.550                               | 0.6                                 | 0.068 | 8.2                                 | 1.868 | 8.4                                 | 0.180 | 0.7                                 | 0.16 | 999    | 154                                 | 1.066 | 35                                  | 10.64 | 1.066  | 35                                  | 10.64 | 1.066                               | 35    | 10.64  | 1.066                               | 35    | 10.64                               | 1.066 | 35     | 10.64                               | 1.066 | 35                                  |      |
| 95000017   | 14 | 92             | 32 | 0.001                               | 5.522                               | 1.3                                 | 0.072 | 4.3                                 | 1.799 | 4.5                                 | 0.181 | 1.3                                 | 0.29 | 987    | 172                                 | 1.073 | 26                                  | 10.45 | 1.073  | 26                                  | 10.45 | 1.073                               | 26    | 10.45  | 1.073                               | 26    | 10.45                               | 1.073 | 26     | 10.45                               | 1.073 | 26                                  |      |
| 95000018   | 17 | 80             | 28 | 0.001                               | 5.554                               | 0.2                                 | 0.066 | 7.5                                 | 1.866 | 7.6                                 | 0.182 | 0.9                                 | 0.23 | 1056   | 147                                 | 1.083 | 18                                  | 10.74 | 1.083  | 18                                  | 10.74 | 1.083                               | 18    | 10.74  | 1.083                               | 18    | 10.74                               | 1.083 | 18     | 10.74                               | 1.083 | 18                                  |      |
| 95000019   | 13 | 84             | 29 | 0.001                               | 5.508                               | 1.2                                 | 0.072 | 5.0                                 | 1.813 | 5.1                                 | 0.182 | 1.2                                 | 0.24 | 997    | 196                                 | 1.075 | 24                                  | 10.50 | 1.075  | 24                                  | 10.50 | 1.075                               | 24    | 10.50  | 1.075                               | 24    | 10.50                               | 1.075 | 24     | 10.50                               | 1.075 | 24                                  |      |
| 95000020   | 12 | 76             | 28 | 0.000                               | 5.564                               | 0.9                                 | 0.075 | 1.3                                 | 1.864 | 1.6                                 | 0.180 | 0.9                                 | 0.51 | 1074   | 52                                  | 1.086 | 18                                  | 10.68 | 1.086  | 18                                  | 10.68 | 1.086                               | 18    | 10.68  | 1.086                               | 18    | 10.68                               | 1.086 | 18     | 10.68                               | 1.086 | 18                                  |      |
| 95000021   | 14 | 90             | 31 | 0.002                               | 5.547                               | 1.6                                 | 0.080 | 10.5                                | 1.879 | 10.6                                | 0.180 | 1.6                                 | 0.15 | 1187   | 388                                 | 1.088 | 22                                  | 11.08 | 1.088  | 22                                  | 11.08 | 1.088                               | 22    | 11.08  | 1.088                               | 22    | 11.08                               | 1.088 | 22     | 11.08                               | 1.088 | 22                                  |      |
| 95000022   | 12 | 76             | 27 | 0.001                               | 5.513                               | 0.4                                 | 0.073 | 1.6                                 | 1.856 | 1.8                                 | 0.181 | 0.3                                 | 0.30 | 1047   | 103                                 | 1.075 | 24                                  | 10.50 | 1.075  | 24                                  | 10.50 | 1.075                               | 24    | 10.50  | 1.075                               | 24    | 10.50                               | 1.075 | 24     | 10.50                               | 1.075 | 24                                  |      |
| 95000033   | 12 | 77             | 27 | 0.000                               | 5.623                               | 1.2                                 | 0.074 | 1.6                                 | 1.826 | 2.0                                 | 0.178 | 1.2                                 | 0.58 | 1055   | 66                                  | 1.055 | 23                                  | 10.55 | 1.055  | 23                                  | 10.55 | 1.055                               | 23    | 10.55  | 1.055                               | 23    | 10.55                               | 1.055 | 23     | 10.55                               | 1.055 | 23                                  |      |
| 95000034   | 12 | 78             | 28 | 0.001                               | 5.542                               | 0.5                                 | 0.072 | 1.2                                 | 1.844 | 1.7                                 | 0.180 | 0.7                                 | 0.40 | 1078   | 102                                 | 1.080 | 12                                  | 10.73 | 1.080  | 12                                  | 10.73 | 1.080                               | 12    | 10.73  | 1.080                               | 12    | 10.73                               | 1.080 | 12     | 10.73                               | 1.080 | 12                                  |      |
| 95000035   | 12 | 79             | 28 | 0.001                               | 5.566                               | 0.9                                 | 0.078 | 4.6                                 | 1.868 | 4.7                                 | 0.177 | 0.9                                 | 0.20 | 1144   | 178                                 | 1.048 | 18                                  | 10.60 | 1.048  | 18                                  | 10.60 | 1.048                               | 18    | 10.60  | 1.048                               | 18    | 10.60                               | 1.048 | 18     | 10.60                               | 1.048 | 18                                  |      |
| 95000036   | 12 | 78             | 28 | 0.000                               | 5.548                               | 0.8                                 | 0.074 | 0.8                                 | 1.779 | 1.2                                 | 0.174 | 0.8                                 | 0.72 | 1040   | 33                                  | 1.034 | 16                                  | 10.36 | 1.034  | 16                                  | 10.36 | 1.034                               | 16    | 10.36  | 1.034                               | 16    | 10.36                               | 1.034 | 16     | 10.36                               | 1.034 | 16                                  |      |
| 95000038   | 15 | 92             | 34 | 0.000                               | 5.468                               | 0.9                                 | 0.073 | 2.8                                 | 1.800 | 2.8                                 | 0.183 | 0.9                                 | 0.33 | 1024   | 103                                 | 1.063 | 28                                  | 10.63 | 1.063  | 28                                  | 10.63 | 1.063                               | 28    | 10.63  | 1.063                               | 28    | 10.63                               | 1.063 | 28     | 10.63                               | 1.063 | 28                                  |      |
| 95000039   | 15 | 94             | 34 | 0.000                               | 5.469                               | 0.6                                 | 0.074 | 2.6                                 | 1.869 | 2.7                                 | 0.183 | 0.6                                 | 0.22 | 1045   | 104                                 | 1.082 | 12                                  | 10.70 | 1.082  | 12                                  | 10.70 | 1.082                               | 12    | 10.70  | 1.082                               | 12    | 10.70                               | 1.082 | 12     | 10.70                               | 1.082 | 12                                  |      |
| 95000040   | 15 | 86             | 30 | 0.000                               | 5.560                               | 0.7                                 | 0.076 | 2.3                                 | 1.878 | 2.4                                 | 0.178 | 0.7                                 | 0.28 | 1078   | 91                                  | 1.086 | 12                                  | 10.73 | 1.086  | 12                                  | 10.73 | 1.086                               | 12    | 10.73  | 1.086                               | 12    | 10.73                               | 1.086 | 12     | 10.73                               | 1.086 | 12                                  |      |
| 95000041   | 14 | 89             | 31 | 0.000                               | 5.523                               | 0.7                                 | 0.077 | 1.4                                 | 1.823 | 1.5                                 | 0.181 | 0.7                                 | 0.45 | 1122   | 54                                  | 1.073 | 14                                  | 10.69 | 1.073  | 14                                  | 10.69 | 1.073                               | 14    | 10.69  | 1.073                               | 14    | 10.69                               | 1.073 | 14     | 10.69                               | 1.073 | 14                                  |      |
| 95000042   | 13 | 82             | 29 | 0.001                               | 5.537                               | 0.7                                 | 0.077 | 3.4                                 | 1.867 | 3.7                                 | 0.181 | 0.7                                 | 0.20 | 1097   | 142                                 | 1.070 | 20                                  | 10.79 | 1.070  | 20                                  | 10.79 | 1.070                               | 20    | 10.79  | 1.070                               | 20    | 10.79                               | 1.070 | 20     | 10.79                               | 1.070 | 20                                  |      |
| 95000027   | 13 | 80             | 28 | 0.000                               | 5.400                               | 1.0                                 | 0.075 | 1.7                                 | 1.904 | 2.0                                 | 0.185 | 1.0                                 | 0.50 | 1057   | 69                                  | 1.095 | 20                                  | 10.83 | 1.095  | 20                                  | 10.83 | 1.095                               | 20    | 10.83  | 1.095                               | 20    | 10.83                               | 1.095 | 20     | 10.83                               | 1.095 | 20                                  |      |
| 95000028   | 12 | 80             | 29 | 0.000                               | 5.526                               | 0.6                                 | 0.073 | 2.5                                 | 1.820 | 2.6                                 | 0.181 | 0.6                                 | 0.16 | 1013   | 139                                 | 1.072 | 11                                  | 10.53 | 1.072  | 11                                  | 10.53 | 1.072                               | 11    | 10.53  | 1.072                               | 11    | 10.53                               | 1.072 | 11     | 10.53                               | 1.072 | 11                                  |      |
| 95000029   | 12 | 80             | 29 | 0.000                               | 5.536                               | 1.0                                 | 0.077 | 2.7                                 | 1.918 | 2.9                                 | 0.180 | 0.9                                 | 0.34 | 1122   | 109                                 | 1.087 | 18                                  | 10.87 | 1.087  | 18                                  | 10.87 | 1.087                               | 18    | 10.87  | 1.087                               | 18    | 10.87                               | 1.087 | 18     | 10.87                               | 1.087 | 18                                  |      |
| 95000030   | 12 | 81             | 29 | 0.000                               | 5.556                               | 0.9                                 | 0.076 | 2.8                                 | 1.880 | 3.3                                 | 0.180 | 0.9                                 | 0.29 | 1101   | 109                                 | 1.067 | 17                                  | 10.78 | 1.067  | 17                                  | 10.78 | 1.067                               | 17    | 10.78  | 1.067                               | 17    | 10.78                               | 1.067 | 17     | 10.78                               | 1.067 | 17                                  |      |
| 95000031   | 13 | 80             | 28 | 0.001                               | 5.465                               | 0.9                                 | 0.075 | 3.7                                 | 1.880 | 3.9                                 | 0.183 | 0.9                                 | 0.23 | 1056   | 147                                 | 1.083 | 18                                  | 10.74 | 1.083  | 18                                  | 10.74 | 1.083                               | 18    | 10.74  | 1.083                               | 18    | 10.74                               | 1.083 | 18     | 10.74                               | 1.083 | 18                                  |      |
| 95000032   | 13 | 80             | 29 | 0.001                               | 5.478                               | 1.3                                 | 0.070 | 6.0                                 | 1.773 | 6.1                                 | 0.183 | 1.3                                 | 0.21 | 942    | 235                                 | 1.081 | 25                                  | 10.36 | 1.081  | 25                                  | 10.36 | 1.081                               | 25    | 10.36  | 1.081                               | 25    | 10.36                               | 1.081 | 25     | 10.36                               | 1.081 | 25                                  |      |
| 95000033   | 13 | 81             | 29 | 0.001                               | 5.581                               | 0.7                                 | 0.074 | 4.9                                 | 1.844 | 4.9                                 | 0.179 | 0.7                                 | 0.44 | 1048   | 192                                 | 1.082 | 16                                  | 10.58 | 1.082  | 16                                  | 10.58 | 1.082                               | 16    | 10.58  | 1.082                               | 16    | 10.58                               | 1.082 | 16     | 10.58                               | 1.082 | 16                                  |      |
| 95000034   | 13 | 79             | 28 | 0.001                               | 5.406                               | 1.3                                 | 0.077 | 3.7                                 | 1.965 | 3.9                                 | 0.185 | 1.3                                 | 0.32 | 1123   | 145                                 | 1.094 | 25                                  | 11.04 | 1.094  | 25                                  | 11.04 | 1.094                               | 25    | 11.04  | 1.094                               | 25    | 11.04                               | 1.094 | 25     | 11.04                               | 1.094 | 25                                  |      |
| 95000037   | 13 | 78             | 27 | 0.000                               | 5.548                               | 0.9                                 | 0.077 | 2.8                                 | 1.874 | 3.0                                 | 0.180 | 0.9                                 | 0.31 | 1110   | 110                                 | 1.025 | 19                                  | 11.07 | 1.025  | 19                                  | 11.07 | 1.025                               | 19    | 11.07  | 1.025                               | 19    | 11.07                               | 1.025 | 19     | 11.07                               | 1.025 | 19                                  |      |
| 95000038   | 10 | 80             | 28 | 0.000                               | 5.462                               | 0.9                                 | 0.075 | 1.4                                 | 1.877 | 1.5                                 | 0.183 | 0.2                                 | 0.22 | 1021   | 177                                 | 1.081 | 11                                  | 10.63 | 1.081  | 11                                  | 10.63 | 1.081                               | 11    | 10.63  | 1.081                               | 11    | 10                                  |       |        |                                     |       |                                     |      |



LASER ABLATION ZIRCON U-Pb DATA

[illegible]

[illegible]

TABLE S6: LASER ABLATION ZIRCON U-Pb STANDARD

| Analysis # | 207Pb  |      | 207Pb |            | 207Pb   |             | 207Th |            | 208U  |            | Th/U |       | Contents (ppm) |       |             |       |             |      |             |    |             |    |             |    | Data for Tera-Wasserberg plot |      |             |    |             |    |             |    |             |    |             |    | Data for Normal - Wetherill plot |    |             |    |             |    |              |               |  |  |  |  | Ages (Ma) |  |  |  | Discordance (%) |  |  |  |
|------------|--------|------|-------|------------|---------|-------------|-------|------------|-------|------------|------|-------|----------------|-------|-------------|-------|-------------|------|-------------|----|-------------|----|-------------|----|-------------------------------|------|-------------|----|-------------|----|-------------|----|-------------|----|-------------|----|----------------------------------|----|-------------|----|-------------|----|--------------|---------------|--|--|--|--|-----------|--|--|--|-----------------|--|--|--|
|            | (cps)  |      | (cps) |            | (cps)   |             | (cps) |            | (cps) |            |      |       |                |       |             |       |             |      |             |    |             |    |             |    |                               |      |             |    |             |    |             |    |             |    |             |    |                                  |    |             |    |             |    |              |               |  |  |  |  |           |  |  |  |                 |  |  |  |
|            | Pb     | Th   | U     | 238U/206Pb | 1σ      | 207Pb/206Pb | 1σ    | 207Pb/238U | 1σ    | 207Pb/238U | 1σ   | ρ     | 207Pb/206Pb    | 1σ    | 207Pb/206Pb | 1σ    | 207Pb/206Pb | 1σ   | 207Pb/206Pb | 1σ | 207Pb/206Pb | 1σ | 207Pb/206Pb | 1σ | 207Pb/206Pb                   | 1σ   | 207Pb/206Pb | 1σ | 207Pb/206Pb | 1σ | 207Pb/206Pb | 1σ | 207Pb/206Pb | 1σ | 207Pb/206Pb | 1σ | 207Pb/206Pb                      | 1σ | 207Pb/206Pb | 1σ | 207Pb/206Pb | 1σ | 6-38/<br>7-6 | 6-38/<br>7-35 |  |  |  |  |           |  |  |  |                 |  |  |  |
| 91500      | 68500  | 5210 | 4800  | 99100      | 480000  | 0.42        | 79    | 31         | 15    | 5.473      | 2.0  | 0.075 | 1.2            | 1.889 | 2.2         | 0.183 | 2.0         | 0.89 | 1081        | 47 | 1084        | 38 | 1076        | 30 | -0.3                          | 0.7  |             |    |             |    |             |    |             |    |             |    |                                  |    |             |    |             |    |              |               |  |  |  |  |           |  |  |  |                 |  |  |  |
| Z 91500_1  | 70900  | 5364 | 5800  | 95300      | 503000  | 0.38        | 84    | 31         | 18    | 5.534      | 1.9  | 0.075 | 1.2            | 1.873 | 2.2         | 0.181 | 1.9         | 0.86 | 1065        | 50 | 1071        | 37 | 1072        | 29 | -0.6                          | -0.1 |             |    |             |    |             |    |             |    |             |    |                                  |    |             |    |             |    |              |               |  |  |  |  |           |  |  |  |                 |  |  |  |
| Z 91500_2  | 63600  | 4709 | 4000  | 76200      | 452000  | 0.35        | 76    | 27         | 13    | 5.519      | 1.9  | 0.073 | 1.2            | 1.842 | 2.2         | 0.181 | 1.9         | 0.84 | 1017        | 46 | 1073        | 37 | 1059        | 29 | -5.5                          | 1.3  |             |    |             |    |             |    |             |    |             |    |                                  |    |             |    |             |    |              |               |  |  |  |  |           |  |  |  |                 |  |  |  |
| Z 91500_3  | 68800  | 5240 | 6800  | 91200      | 505000  | 0.37        | 82    | 33         | 22    | 5.528      | 2.0  | 0.076 | 1.2            | 1.881 | 2.3         | 0.181 | 2.0         | 0.85 | 1080        | 49 | 1071        | 39 | 1073        | 31 | 0.8                           | -0.2 |             |    |             |    |             |    |             |    |             |    |                                  |    |             |    |             |    |              |               |  |  |  |  |           |  |  |  |                 |  |  |  |
| Z 91500_4  | 45940  | 3459 | 5300  | 50700      | 335300  | 0.32        | 80    | 31         | 18    | 5.552      | 2.0  | 0.074 | 1.2            | 1.828 | 2.3         | 0.180 | 2.0         | 0.87 | 1037        | 50 | 1067        | 39 | 1056        | 29 | -2.9                          | 1.0  |             |    |             |    |             |    |             |    |             |    |                                  |    |             |    |             |    |              |               |  |  |  |  |           |  |  |  |                 |  |  |  |
| Z 91500_5  | 43940  | 3276 | 2800  | 48500      | 314000  | 0.26        | 80    | 29         | 10    | 5.559      | 1.9  | 0.074 | 1.2            | 1.847 | 2.2         | 0.180 | 1.9         | 0.85 | 1037        | 49 | 1066        | 37 | 1061        | 29 | -2.8                          | 0.5  |             |    |             |    |             |    |             |    |             |    |                                  |    |             |    |             |    |              |               |  |  |  |  |           |  |  |  |                 |  |  |  |
| Z 91500_6  | 62200  | 4780 | 4100  | 85200      | 467000  | 0.45        | 84    | 42         | 16    | 5.714      | 1.9  | 0.076 | 1.1            | 1.836 | 2.2         | 0.175 | 1.9         | 0.85 | 1032        | 46 | 1039        | 36 | 1057        | 29 | 4.9                           | -1.7 |             |    |             |    |             |    |             |    |             |    |                                  |    |             |    |             |    |              |               |  |  |  |  |           |  |  |  |                 |  |  |  |
| Z 91500_7  | 44180  | 3419 | 3900  | 43300      | 322300  | 0.31        | 73    | 24         | 16    | 5.537      | 2.0  | 0.076 | 1.3            | 1.874 | 2.3         | 0.181 | 2.0         | 0.86 | 1089        | 50 | 1070        | 39 | 1070        | 30 | 1.7                           | 0.0  |             |    |             |    |             |    |             |    |             |    |                                  |    |             |    |             |    |              |               |  |  |  |  |           |  |  |  |                 |  |  |  |
| Z 91500_8  | 45440  | 3482 | 4300  | 51400      | 341000  | 0.35        | 83    | 32         | 17    | 5.699      | 2.0  | 0.076 | 1.3            | 1.824 | 2.3         | 0.176 | 2.0         | 0.86 | 1084        | 53 | 1047        | 38 | 1052        | 30 | 2.0                           | -0.5 |             |    |             |    |             |    |             |    |             |    |                                  |    |             |    |             |    |              |               |  |  |  |  |           |  |  |  |                 |  |  |  |
| Z 91500_9  | 37670  | 2907 | 2100  | 35600      | 283700  | 0.37        | 80    | 29         | 9     | 5.714      | 2.0  | 0.076 | 1.3            | 1.812 | 2.3         | 0.175 | 2.0         | 0.85 | 1087        | 50 | 1039        | 38 | 1052        | 30 | 4.4                           | -1.2 |             |    |             |    |             |    |             |    |             |    |                                  |    |             |    |             |    |              |               |  |  |  |  |           |  |  |  |                 |  |  |  |
| Z 91500_10 | 36530  | 2778 | 1500  | 41200      | 270100  | 0.36        | 79    | 34         | 7     | 5.559      | 2.0  | 0.075 | 1.4            | 1.856 | 2.4         | 0.180 | 2.0         | 0.84 | 1067        | 54 | 1066        | 40 | 1063        | 32 | 0.1                           | 0.3  |             |    |             |    |             |    |             |    |             |    |                                  |    |             |    |             |    |              |               |  |  |  |  |           |  |  |  |                 |  |  |  |
| Z 91500_11 | 39940  | 2705 | 2000  | 32000      | 268600  | 0.34        | 80    | 27         | 13    | 5.593      | 2.0  | 0.075 | 1.4            | 1.804 | 2.4         | 0.179 | 2.0         | 0.85 | 1079        | 54 | 1070        | 39 | 1052        | 31 | 0.8                           | 0.8  |             |    |             |    |             |    |             |    |             |    |                                  |    |             |    |             |    |              |               |  |  |  |  |           |  |  |  |                 |  |  |  |
| Z 91500_12 | 38460  | 2912 | 4100  | 37600      | 298300  | 0.32        | 80    | 30         | 17    | 5.774      | 1.9  | 0.074 | 1.3            | 1.771 | 2.3         | 0.173 | 1.9         | 0.86 | 1049        | 54 | 1029        | 37 | 1034        | 29 | 1.9                           | -0.5 |             |    |             |    |             |    |             |    |             |    |                                  |    |             |    |             |    |              |               |  |  |  |  |           |  |  |  |                 |  |  |  |
| Z 91500_13 | 37520  | 2822 | 7500  | 40500      | 286600  | 0.30        | 79    | 32         | 31    | 5.682      | 1.9  | 0.074 | 1.4            | 1.793 | 2.3         | 0.176 | 1.9         | 0.83 | 1033        | 55 | 1045        | 37 | 1045        | 30 | -1.2                          | 0.0  |             |    |             |    |             |    |             |    |             |    |                                  |    |             |    |             |    |              |               |  |  |  |  |           |  |  |  |                 |  |  |  |
| Z 91500_14 | 38010  | 2895 | 300   | 36100      | 292000  | 0.25        | 80    | 29         | 1     | 5.760      | 2.0  | 0.074 | 1.3            | 1.780 | 2.4         | 0.174 | 2.0         | 0.85 | 1077        | 54 | 1070        | 38 | 1037        | 31 | 1.5                           | 0.6  |             |    |             |    |             |    |             |    |             |    |                                  |    |             |    |             |    |              |               |  |  |  |  |           |  |  |  |                 |  |  |  |
| Z 91500_15 | 37540  | 2824 | 4500  | 51500      | 267500  | 0.42        | 80    | 30         | 17    | 5.444      | 2.0  | 0.075 | 1.5            | 1.913 | 2.4         | 0.184 | 2.0         | 0.85 | 1077        | 59 | 1087        | 40 | 1088        | 33 | -0.9                          | -0.1 |             |    |             |    |             |    |             |    |             |    |                                  |    |             |    |             |    |              |               |  |  |  |  |           |  |  |  |                 |  |  |  |
| Z 91500_16 | 36310  | 2732 | 3500  | 53000      | 260400  | 0.42        | 80    | 31         | 13    | 5.336      | 2.1  | 0.074 | 1.4            | 1.906 | 2.5         | 0.187 | 2.1         | 0.85 | 1031        | 56 | 1106        | 43 | 1080        | 33 | -7.3                          | 2.4  |             |    |             |    |             |    |             |    |             |    |                                  |    |             |    |             |    |              |               |  |  |  |  |           |  |  |  |                 |  |  |  |
| Z 91500_17 | 39760  | 2968 | 8900  | 50400      | 262000  | 0.43        | 80    | 29         | 4     | 5.459      | 2.1  | 0.076 | 1.3            | 1.919 | 2.4         | 0.183 | 2.1         | 0.86 | 1106        | 53 | 1083        | 42 | 1089        | 32 | 2.1                           | -0.6 |             |    |             |    |             |    |             |    |             |    |                                  |    |             |    |             |    |              |               |  |  |  |  |           |  |  |  |                 |  |  |  |
| Z 91500_18 | 39000  | 2968 | 4800  | 50000      | 289200  | 0.38        | 81    | 31         | 18    | 5.574      | 2.1  | 0.076 | 1.3            | 1.875 | 2.4         | 0.179 | 2.1         | 0.87 | 1078        | 53 | 1063        | 40 | 1070        | 32 | 1.4                           | -0.7 |             |    |             |    |             |    |             |    |             |    |                                  |    |             |    |             |    |              |               |  |  |  |  |           |  |  |  |                 |  |  |  |
| Z 91500_19 | 37480  | 2885 | 1900  | 47100      | 270100  | 0.35        | 79    | 30         | 7     | 5.453      | 1.9  | 0.077 | 1.3            | 1.925 | 2.3         | 0.183 | 1.9         | 0.85 | 1106        | 53 | 1088        | 37 | 1091        | 32 | 1.6                           | -0.3 |             |    |             |    |             |    |             |    |             |    |                                  |    |             |    |             |    |              |               |  |  |  |  |           |  |  |  |                 |  |  |  |
| Z 91500_20 | 38940  | 2973 | 1700  | 44800      | 274500  | 0.34        | 81    | 29         | 6     | 5.461      | 2.0  | 0.075 | 1.3            | 1.904 | 2.4         | 0.183 | 2.0         | 0.86 | 1089        | 55 | 1086        | 41 | 1084        | 33 | -1.6                          | 0.2  |             |    |             |    |             |    |             |    |             |    |                                  |    |             |    |             |    |              |               |  |  |  |  |           |  |  |  |                 |  |  |  |
| Z 91500_21 | 37900  | 2903 | 7900  | 51600      | 283700  | 0.34        | 80    | 30         | 31    | 5.708      | 2.0  | 0.076 | 1.4            | 1.837 | 2.4         | 0.175 | 2.0         | 0.86 | 1076        | 54 | 1040        | 39 | 1057        | 31 | 3.3                           | -1.6 |             |    |             |    |             |    |             |    |             |    |                                  |    |             |    |             |    |              |               |  |  |  |  |           |  |  |  |                 |  |  |  |
| Z 91500_22 | 36550  | 2768 | 6000  | 50300      | 270700  | 0.39        | 80    | 30         | 23    | 5.596      | 2.0  | 0.076 | 1.3            | 1.840 | 2.4         | 0.179 | 2.0         | 0.85 | 1087        | 52 | 1059        | 39 | 1060        | 30 | 2.6                           | -0.1 |             |    |             |    |             |    |             |    |             |    |                                  |    |             |    |             |    |              |               |  |  |  |  |           |  |  |  |                 |  |  |  |
| Z 91500_23 | 35950  | 2767 | 4400  | 49600      | 265500  | 0.38        | 80    | 30         | 17    | 5.912      | 2.0  | 0.075 | 1.4            | 1.848 | 2.4         | 0.178 | 2.0         | 0.85 | 1082        | 55 | 1057        | 39 | 1050        | 31 | 0.5                           | 0.3  |             |    |             |    |             |    |             |    |             |    |                                  |    |             |    |             |    |              |               |  |  |  |  |           |  |  |  |                 |  |  |  |
| Z 91500_24 | 38120  | 2921 | 3500  | 55100      | 285700  | 0.37        | 80    | 30         | 13    | 5.605      | 2.0  | 0.074 | 1.2            | 1.809 | 2.4         | 0.178 | 2.0         | 0.86 | 1044        | 51 | 1057        | 40 | 1049        | 32 | -1.2                          | 0.8  |             |    |             |    |             |    |             |    |             |    |                                  |    |             |    |             |    |              |               |  |  |  |  |           |  |  |  |                 |  |  |  |
| Z 91500_25 | 37620  | 2914 | 5700  | 56100      | 278800  | 0.39        | 80    | 31         | 22    | 5.593      | 2.0  | 0.076 | 1.4            | 1.862 | 2.4         | 0.179 | 2.0         | 0.84 | 1106        | 56 | 1060        | 39 | 1067        | 31 | 4.2                           | -0.7 |             |    |             |    |             |    |             |    |             |    |                                  |    |             |    |             |    |              |               |  |  |  |  |           |  |  |  |                 |  |  |  |
| Z 91500_26 | 38710  | 2871 | 200   | 50600      | 275100  | 0.35        | 80    | 29         | 1     | 5.526      | 2.0  | 0.075 | 1.4            | 1.844 | 2.4         | 0.181 | 2.0         | 0.83 | 1083        | 57 | 1072        | 39 | 1061        | 32 | -0.8                          | 1.0  |             |    |             |    |             |    |             |    |             |    |                                  |    |             |    |             |    |              |               |  |  |  |  |           |  |  |  |                 |  |  |  |
| Z 91500_27 | 35680  | 2737 | 4100  | 45100      | 271100  | 0.22        | 80    | 31         | 16    | 5.663      | 2.0  | 0.075 | 1.3            | 1.833 | 2.4         | 0.177 | 2.0         | 0.85 | 1066        | 52 | 1050        | 40 | 1055        | 31 | 1.5                           | -0.5 |             |    |             |    |             |    |             |    |             |    |                                  |    |             |    |             |    |              |               |  |  |  |  |           |  |  |  |                 |  |  |  |
| Z 91500_28 | 34240  | 2593 | 1900  | 49900      | 251700  | 0.31        | 80    | 34         | 8     | 5.634      | 2.1  | 0.075 | 1.3            | 1.829 | 2.4         | 0.178 | 2.1         | 0.88 | 1066        | 55 | 1052        | 41 | 1054        | 31 | 0.4                           | -0.2 |             |    |             |    |             |    |             |    |             |    |                                  |    |             |    |             |    |              |               |  |  |  |  |           |  |  |  |                 |  |  |  |
| Z 91500_29 | 33330  | 2519 | 400   | 37700      | 243300  | 0.27        | 80    | 25         | 4     | 5.621      | 2.0  | 0.076 | 1.2            | 1.858 | 2.4         | 0.178 | 2.0         | 0.87 | 1051        | 59 | 1058        | 39 | 1053        | 32 | 1.0                           | -0.2 |             |    |             |    |             |    |             |    |             |    |                                  |    |             |    |             |    |              |               |  |  |  |  |           |  |  |  |                 |  |  |  |
| Z 91500_30 | 65000  | 4990 | 7400  | 108900     | 468000  | 0.38        | 81    | 33         | 30    | 5.565      | 1.9  | 0.074 | 1.2            | 1.859 | 2.2         | 0.180 | 1.9         | 0.85 | 1051        | 50 | 1065        | 37 | 1065        | 30 | -1.3                          | 0.0  |             |    |             |    |             |    |             |    |             |    |                                  |    |             |    |             |    |              |               |  |  |  |  |           |  |  |  |                 |  |  |  |
| Z 91500_31 | 60900  | 4467 | 5200  | 100500     | 438000  | 0.39        | 79    | 30         | 21    | 5.504      | 2.0  | 0.074 | 1.2            | 1.867 | 2.3         | 0.182 | 2.0         | 0.86 | 1027        | 48 | 1076        | 39 | 1068        | 30 | -4.8                          | 0.7  |             |    |             |    |             |    |             |    |             |    |                                  |    |             |    |             |    |              |               |  |  |  |  |           |  |  |  |                 |  |  |  |
| Z 91500_32 | 59200  | 4480 | 2900  | 94300      | 433000  | 0.37        | 80    | 28         | 12    | 5.528      | 2.0  | 0.074 | 1.2            | 1.842 | 2.2         | 0.181 | 2.0         | 0.89 | 1035        | 48 | 1071        | 39 | 1059        | 29 | -3.5                          | 1.1  |             |    |             |    |             |    |             |    |             |    |                                  |    |             |    |             |    |              |               |  |  |  |  |           |  |  |  |                 |  |  |  |
| GJ1        |        |      |       |            |         |             |       |            |       |            |      |       |                |       |             |       |             |      |             |    |             |    |             |    |                               |      |             |    |             |    |             |    |             |    |             |    |                                  |    |             |    |             |    |              |               |  |  |  |  |           |  |  |  |                 |  |  |  |
| Z GJ1_0    | 121700 | 7380 | -170  | 29900      | 1596000 | 0.04        | 249   | 11         | N.D.  | 10.132     | 1.8  | 0.060 | 1.1            | 0.812 | 2.2         | 0.099 | 1.8         | 0.85 | 596         | 48 | 607         | 22 | 603         | 19 | -1.9                          | 0.7  |             |    |             |    |             |    |             |    |             |    |                                  |    |             |    |             |    |              |               |  |  |  |  |           |  |  |  |                 |  |  |  |
| Z GJ1_1    | 125700 | 7680 | -110  | 25300      | 1643000 | 0.03        | 248   | 10         | N.D.  | 10.070     | 1.8  | 0.061 | 1.2            | 0.824 | 2.1         | 0.099 | 1.8         | 0.85 | 619         | 49 | 610         | 21 | 610         | 19 | 1.4                           | 0.0  |             |    |             |    |             |    |             |    |             |    |                                  |    |             |    |             |    |              |               |  |  |  |  |           |  |  |  |                 |  |  |  |
| Z GJ1_2    | 129100 | 7890 | -70   | 22000      | 1699000 | 0.03        | 251   | 10         | N.D.  | 10.040     | 1.8  | 0.060 | 1.1            | 0.830 | 2.1         | 0.100 | 1.8         | 0.86 | 624         | 49 | 614         | 20 | 614         | 19 | 0.3                           | -0.3 |             |    |             |    |             |    |             |    |             |    |                                  |    |             |    |             |    |              |               |  |  |  |  |           |  |  |  |                 |  |  |  |
| Z GJ1_3    | 128700 | 7950 | 650   | 31200      | 1695000 | 0.03        | 245   | 13         | 2     | 11.062     | 1.8  | 0.061 | 1.1            | 0.829 | 2.1         | 0.099 | 1.8         | 0.86 | 624         | 47 | 611         | 21 | 612         | 19 | 2.1                           | -0.3 |             |    |             |    |             |    |             |    |             |    |                                  |    |             |    |             |    |              |               |  |  |  |  |           |  |  |  |                 |  |  |  |
| Z GJ1_4    | 128400 | 7790 | 860   | 28800      | 1722000 | 0.03        | 458   | 17         | 3     | 10.187     | 1.8  | 0.060 | 1.2            | 0.806 | 2.2         | 0.098 | 1.8         | 0.82 | 586         | 49 | 604         | 21 | 600         | 19 | -3.0                          | 0.6  |             |    |             |    |             |    |             |    |             |    |                                  |    |             |    |             |    |              |               |  |  |  |  |           |  |  |  |                 |  |  |  |
| Z GJ1_5    | 133000 | 8080 | 300   | 28500      | 1762000 | 0.03        | 467   | 17         | 5     | 10.152     | 1.8  | 0.060 | 1.2            | 0.818 | 2.1         | 0.099 | 1.8         | 0.83 | 609         | 50 | 606         | 21 | 607         | 19 | 0.6                           | -0.2 |             |    |             |    |             |    |             |    |             |    |                                  |    |             |    |             |    |              |               |  |  |  |  |           |  |  |  |                 |  |  |  |
| Z GJ1_6    | 125600 | 7700 | 5200  | 23500      | 1705000 | 0.03        | 418   | 23         | 21    | 10.384     | 1.8  | 0.061 | 1.2            | 0.805 | 2.2         | 0.096 | 1.8         | 0.84 | 628         | 51 | 603         | 21 | 600         | 20 | 5.6                           | -1.1 |             |    |             |    |             |    |             |    |             |    |                                  |    |             |    |             |    |              |               |  |  |  |  |           |  |  |  |                 |  |  |  |
| Z GJ1_7    | 126900 | 7770 | 2700  | 26800      | 1671000 | 0.03        | 433   | 22         | 11    | 10.267     | 1.8  | 0.060 | 1.2            | 0.803 | 2.1         | 0.097 | 1.8         | 0.85 | 589         | 50 | 599         | 21 | 598         | 19 | -1.7                          | 0.2  |             |    |             |    |             |    |             |    |             |    |                                  |    |             |    |             |    |              |               |  |  |  |  |           |  |  |  |                 |  |  |  |
| Z GJ1_8    | 129900 | 7850 | 2200  | 27700      | 1769000 | 0.03        | 436   | 26         | 9     | 10.267     | 1.8  | 0.060 | 1.2            | 0.802 | 2.1         | 0.097 | 1.8         | 0.87 | 588         | 51 | 599         | 21 | 599         | 20 | -1.9                          | 0.1  |             |    |             |    |             |    |             |    |             |    |                                  |    |             |    |             |    |              |               |  |  |  |  |           |  |  |  |                 |  |  |  |
| Z GJ1_9    | 129700 | 7870 | 100   | 28700      | 1684000 | 0.03        | 439   | 26         | 10    | 10.267     | 1.8  | 0.060 | 1.2            | 0.802 | 2.1         | 0.097 | 1.8         | 0.87 | 588         | 51 | 599         | 21 | 599         | 20 | -1.9                          | 0.1  |             |    |             |    |             |    |             |    |             |    |                                  |    |             |    |             |    |              |               |  |  |  |  |           |  |  |  |                 |  |  |  |
| Z GJ1_10   | 111200 | 6840 | 1     |            |         |             |       |            |       |            |      |       |                |       |             |       |             |      |             |    |             |    |             |    |                               |      |             |    |             |    |             |    |             |    |             |    |                                  |    |             |    |             |    |              |               |  |  |  |  |           |  |  |  |                 |  |  |  |
